# Supplementary material for: Effectiveness and limitation of the performance prediction of perovskite solar cells by process informatics
Source: Royal Society of Chemistry journal article supplement (doi:10.1039/d3ya00617d), 2024-01-01
Supplement: d3ya00617d2.xlsx [file d3ya00617d2.xlsx]

## Sheet: Table of Contents
Table of Contents
Table S1. Assignment of material and process information in our curated dataset
Table S2. Correspondence between abbreviations and chemical formulas in perovskite composition
Table S3. Hyperparameters used in random forest regression
Table S4. Comparison of all metrics of PCE regression by RF model using all columns of materials and processes
Table S5. Comparison of PCE regression by different combinations of data split and complements at the different train-test separation. The value is R2 of the test dataset
Table S6. Sorted mean SHAP value
Table S7. Sorted raw feature importance before aggregation
Table S8. Sorted feature importance after aggregation for the 248 columns

## Sheet: Table S1
Table S1. Assignment of material and process information in our curated dataset
columns	Functional layer	Materials or Process
Cell_area_total	Other	Proc.
Cell_area_measured	Other	Proc.
Cell_number_of_cells_per_substrate	Other	Proc.
Cell_architecture	Other	Proc.
Cell_flexible	Other	Proc.
Cell_flexible_min_bending_radius	Other	Proc.
Cell_semitransparent	Other	Proc.
Cell_semitransparent_AVT	Other	Proc.
Cell_semitransparent_wavelength_range	Other	Proc.
Cell_semitransparent_raw_data	Other	Proc.
Module	Other	Proc.
Module_number_of_cells_in_module	Other	Proc.
Module_area_total	Other	Proc.
Module_area_effective	Other	Proc.
Module_JV_data_recalculated_per_cell	Other	Proc.
Substrate_stack_sequence	Substrate	Mat.
Substrate_thickness	Substrate	Proc.
Substrate_area	Substrate	Proc.
Substrate_supplier	Substrate	Proc.
Substrate_brand_name	Substrate	Proc.
Substrate_deposition_procedure	Substrate	Proc.
Substrate_surface_roughness_rms	Substrate	Proc.
Substrate_etching_procedure	Substrate	Proc.
Substrate_cleaning_procedure	Substrate	Proc.
ETL_stack_sequence	ETL	Mat.
ETL_thickness	ETL	Proc.
ETL_additives_compounds	ETL	Proc.
ETL_additives_concentrations	ETL	Proc.
ETL_deposition_procedure	ETL	Proc.
ETL_deposition_aggregation_state_of_reactants	ETL	Proc.
ETL_deposition_synthesis_atmosphere	ETL	Proc.
ETL_deposition_synthesis_atmosphere_pressure_total	ETL	Proc.
ETL_deposition_synthesis_atmosphere_pressure_partial	ETL	Proc.
ETL_deposition_synthesis_atmosphere_relative_humidity	ETL	Proc.
ETL_deposition_solvents	ETL	Proc.
ETL_deposition_solvents_mixing_ratios	ETL	Proc.
ETL_deposition_solvents_supplier	ETL	Proc.
ETL_deposition_solvents_purity	ETL	Proc.
ETL_deposition_reaction_solutions_compounds	ETL	Proc.
ETL_deposition_reaction_solutions_compounds_supplier	ETL	Proc.
ETL_deposition_reaction_solutions_compounds_purity	ETL	Proc.
ETL_deposition_reaction_solutions_concentrations	ETL	Proc.
ETL_deposition_reaction_solutions_volumes	ETL	Proc.
ETL_deposition_reaction_solutions_age	ETL	Proc.
ETL_deposition_reaction_solutions_temperature	ETL	Proc.
ETL_deposition_substrate_temperature	ETL	Proc.
ETL_deposition_thermal_annealing_temperature	ETL	Proc.
ETL_deposition_thermal_annealing_time	ETL	Proc.
ETL_deposition_thermal_annealing_atmosphere	ETL	Proc.
ETL_storage_time_until_next_deposition_step	ETL	Proc.
ETL_storage_atmosphere	ETL	Proc.
ETL_storage_relative_humidity	ETL	Proc.
ETL_surface_treatment_before_next_deposition_step	ETL	Proc.
Perovskite_single_crystal	Perovskite	Proc.
Perovskite_dimension_0D	Perovskite	Proc.
Perovskite_dimension_2D	Perovskite	Proc.
Perovskite_dimension_2D3D_mixture	Perovskite	Proc.
Perovskite_dimension_3D	Perovskite	Proc.
Perovskite_dimension_3D_with_2D_capping_layer	Perovskite	Proc.
Perovskite_dimension_list_of_layers	Perovskite	Proc.
Perovskite_composition_perovskite_ABC3_structure	Perovskite	Mat.
Perovskite_composition_perovskite_inspired_structure	Perovskite	Mat.
Perovskite_composition_a_ions	Perovskite	Mat.
Perovskite_composition_a_ions_coefficients	Perovskite	Mat.
Perovskite_composition_b_ions	Perovskite	Mat.
Perovskite_composition_b_ions_coefficients	Perovskite	Mat.
Perovskite_composition_c_ions	Perovskite	Mat.
Perovskite_composition_c_ions_coefficients	Perovskite	Mat.
Perovskite_composition_none_stoichiometry_components_in_excess	Perovskite	Mat.
Perovskite_composition_short_form	Perovskite	Mat.
Perovskite_composition_long_form	Perovskite	Mat.
Perovskite_composition_assumption	Perovskite	Mat.
Perovskite_composition_inorganic	Perovskite	Mat.
Perovskite_composition_leadfree	Perovskite	Mat.
Perovskite_additives_compounds	Perovskite	Proc.
Perovskite_additives_concentrations	Perovskite	Proc.
Perovskite_thickness	Perovskite	Proc.
Perovskite_band_gap	Perovskite	Proc.
Perovskite_band_gap_graded	Perovskite	Proc.
Perovskite_band_gap_estimation_basis	Perovskite	Proc.
Perovskite_pl_max	Perovskite	Proc.
Perovskite_deposition_number_of_deposition_steps	Perovskite	Proc.
Perovskite_deposition_procedure	Perovskite	Proc.
Perovskite_deposition_aggregation_state_of_reactants	Perovskite	Proc.
Perovskite_deposition_synthesis_atmosphere	Perovskite	Proc.
Perovskite_deposition_synthesis_atmosphere_pressure_total	Perovskite	Proc.
Perovskite_deposition_synthesis_atmosphere_pressure_partial	Perovskite	Proc.
Perovskite_deposition_synthesis_atmosphere_relative_humidity	Perovskite	Proc.
Perovskite_deposition_solvents	Perovskite	Proc.
Perovskite_deposition_solvents_mixing_ratios	Perovskite	Proc.
Perovskite_deposition_solvents_supplier	Perovskite	Proc.
Perovskite_deposition_solvents_purity	Perovskite	Proc.
Perovskite_deposition_reaction_solutions_compounds	Perovskite	Proc.
Perovskite_deposition_reaction_solutions_compounds_supplier	Perovskite	Proc.
Perovskite_deposition_reaction_solutions_compounds_purity	Perovskite	Proc.
Perovskite_deposition_reaction_solutions_concentrations	Perovskite	Proc.
Perovskite_deposition_reaction_solutions_volumes	Perovskite	Proc.
Perovskite_deposition_reaction_solutions_age	Perovskite	Proc.
Perovskite_deposition_reaction_solutions_temperature	Perovskite	Proc.
Perovskite_deposition_substrate_temperature	Perovskite	Proc.
Perovskite_deposition_quenching_induced_crystallisation	Perovskite	Proc.
Perovskite_deposition_quenching_media	Perovskite	Proc.
Perovskite_deposition_quenching_media_mixing_ratios	Perovskite	Proc.
Perovskite_deposition_quenching_media_volume	Perovskite	Proc.
Perovskite_deposition_quenching_media_additives_compounds	Perovskite	Proc.
Perovskite_deposition_quenching_media_additives_concentrations	Perovskite	Proc.
Perovskite_deposition_thermal_annealing_temperature	Perovskite	Proc.
Perovskite_deposition_thermal_annealing_time	Perovskite	Proc.
Perovskite_deposition_thermal_annealing_atmosphere	Perovskite	Proc.
Perovskite_deposition_thermal_annealing_relative_humidity	Perovskite	Proc.
Perovskite_deposition_thermal_annealing_pressure	Perovskite	Proc.
Perovskite_deposition_solvent_annealing	Perovskite	Proc.
Perovskite_deposition_solvent_annealing_timing	Perovskite	Proc.
Perovskite_deposition_solvent_annealing_solvent_atmosphere	Perovskite	Proc.
Perovskite_deposition_solvent_annealing_time	Perovskite	Proc.
Perovskite_deposition_solvent_annealing_temperature	Perovskite	Proc.
Perovskite_deposition_after_treatment_of_formed_perovskite	Perovskite	Proc.
Perovskite_deposition_after_treatment_of_formed_perovskite_met	Perovskite	Proc.
Perovskite_storage_time_until_next_deposition_step	Perovskite	Proc.
Perovskite_storage_atmosphere	Perovskite	Proc.
Perovskite_storage_relative_humidity	Perovskite	Proc.
Perovskite_surface_treatment_before_next_deposition_step	Perovskite	Proc.
HTL_stack_sequence	HTL	Mat.
HTL_thickness_list	HTL	Proc.
HTL_additives_compounds	HTL	Proc.
HTL_additives_concentrations	HTL	Proc.
HTL_deposition_procedure	HTL	Proc.
HTL_deposition_aggregation_state_of_reactants	HTL	Proc.
HTL_deposition_synthesis_atmosphere	HTL	Proc.
HTL_deposition_synthesis_atmosphere_pressure_total	HTL	Proc.
HTL_deposition_synthesis_atmosphere_pressure_partial	HTL	Proc.
HTL_deposition_synthesis_atmosphere_relative_humidity	HTL	Proc.
HTL_deposition_solvents	HTL	Proc.
HTL_deposition_solvents_mixing_ratios	HTL	Proc.
HTL_deposition_solvents_supplier	HTL	Proc.
HTL_deposition_solvents_purity	HTL	Proc.
HTL_deposition_reaction_solutions_compounds	HTL	Proc.
HTL_deposition_reaction_solutions_compounds_supplier	HTL	Proc.
HTL_deposition_reaction_solutions_compounds_purity	HTL	Proc.
HTL_deposition_reaction_solutions_concentrations	HTL	Proc.
HTL_deposition_reaction_solutions_volumes	HTL	Proc.
HTL_deposition_reaction_solutions_age	HTL	Proc.
HTL_deposition_reaction_solutions_temperature	HTL	Proc.
HTL_deposition_substrate_temperature	HTL	Proc.
HTL_deposition_thermal_annealing_temperature	HTL	Proc.
HTL_deposition_thermal_annealing_time	HTL	Proc.
HTL_deposition_thermal_annealing_atmosphere	HTL	Proc.
HTL_storage_time_until_next_deposition_step	HTL	Proc.
HTL_storage_atmosphere	HTL	Proc.
HTL_storage_relative_humidity	HTL	Proc.
HTL_surface_treatment_before_next_deposition_step	HTL	Proc.
Backcontact_stack_sequence	Back contact	Mat.
Backcontact_thickness_list	Back contact	Proc.
Backcontact_additives_compounds	Back contact	Proc.
Backcontact_additives_concentrations	Back contact	Proc.
Backcontact_deposition_procedure	Back contact	Proc.
Backcontact_deposition_aggregation_state_of_reactants	Back contact	Proc.
Backcontact_deposition_synthesis_atmosphere	Back contact	Proc.
Backcontact_deposition_synthesis_atmosphere_pressure_total	Back contact	Proc.
Backcontact_deposition_synthesis_atmosphere_pressure_partial	Back contact	Proc.
Backcontact_deposition_synthesis_atmosphere_relative_humidity	Back contact	Proc.
Backcontact_deposition_solvents	Back contact	Proc.
Backcontact_deposition_solvents_mixing_ratios	Back contact	Proc.
Backcontact_deposition_solvents_supplier	Back contact	Proc.
Backcontact_deposition_solvents_purity	Back contact	Proc.
Backcontact_deposition_reaction_solutions_compounds	Back contact	Proc.
Backcontact_deposition_reaction_solutions_compounds_supplier	Back contact	Proc.
Backcontact_deposition_reaction_solutions_compounds_purity	Back contact	Proc.
Backcontact_deposition_reaction_solutions_concentrations	Back contact	Proc.
Backcontact_deposition_reaction_solutions_volumes	Back contact	Proc.
Backcontact_deposition_reaction_solutions_age	Back contact	Proc.
Backcontact_deposition_reaction_solutions_temperature	Back contact	Proc.
Backcontact_deposition_substrate_temperature	Back contact	Proc.
Backcontact_deposition_thermal_annealing_temperature	Back contact	Proc.
Backcontact_deposition_thermal_annealing_time	Back contact	Proc.
Backcontact_deposition_thermal_annealing_atmosphere	Back contact	Proc.
Backcontact_storage_time_until_next_deposition_step	Back contact	Proc.
Backcontact_storage_atmosphere	Back contact	Proc.
Backcontact_storage_relative_humidity	Back contact	Proc.
Backcontact_surface_treatment_before_next_deposition_step	Back contact	Proc.
Add_lay_front	Other	Mat.
Add_lay_front_function	Other	Proc.
Add_lay_front_stack_sequence	Other	Mat.
Add_lay_front_thickness_list	Other	Proc.
Add_lay_front_additives_compounds	Other	Proc.
Add_lay_front_additives_concentrations	Other	Proc.
Add_lay_front_deposition_procedure	Other	Proc.
Add_lay_front_deposition_aggregation_state_of_reactants	Other	Proc.
Add_lay_front_deposition_synthesis_atmosphere	Other	Proc.
Add_lay_front_deposition_synthesis_atmosphere_pressure_total	Other	Proc.
Add_lay_front_deposition_synthesis_atmosphere_pressure_partial	Other	Proc.
Add_lay_front_deposition_synthesis_atmosphere_relative_humidity	Other	Proc.
Add_lay_front_deposition_solvents	Other	Proc.
Add_lay_front_deposition_solvents_mixing_ratios	Other	Proc.
Add_lay_front_deposition_solvents_supplier	Other	Proc.
Add_lay_front_deposition_solvents_purity	Other	Proc.
Add_lay_front_deposition_reaction_solutions_compounds	Other	Proc.
Add_lay_front_deposition_reaction_solutions_compounds_supplier	Other	Proc.
Add_lay_front_deposition_reaction_solutions_compounds_purity	Other	Proc.
Add_lay_front_deposition_reaction_solutions_concentrations	Other	Proc.
Add_lay_front_deposition_reaction_solutions_volumes	Other	Proc.
Add_lay_front_deposition_reaction_solutions_age	Other	Proc.
Add_lay_front_deposition_reaction_solutions_temperature	Other	Proc.
Add_lay_front_deposition_substrate_temperature	Other	Proc.
Add_lay_front_deposition_thermal_annealing_temperature	Other	Proc.
Add_lay_front_deposition_thermal_annealing_time	Other	Proc.
Add_lay_front_deposition_thermal_annealing_atmosphere	Other	Proc.
Add_lay_front_storage_time_until_next_deposition_step	Other	Proc.
Add_lay_front_storage_atmosphere	Other	Proc.
Add_lay_front_storage_relative_humidity	Other	Proc.
Add_lay_front_surface_treatment_before_next_deposition_step	Other	Proc.
Add_lay_back	Other	Mat.
Add_lay_back_function	Other	Proc.
Add_lay_back_stack_sequence	Other	Mat.
Add_lay_back_thickness_list	Other	Proc.
Add_lay_back_additives_compounds	Other	Proc.
Add_lay_back_additives_concentrations	Other	Proc.
Add_lay_back_deposition_procedure	Other	Proc.
Add_lay_back_deposition_aggregation_state_of_reactants	Other	Proc.
Add_lay_back_deposition_synthesis_atmosphere	Other	Proc.
Add_lay_back_deposition_synthesis_atmosphere_pressure_total	Other	Proc.
Add_lay_back_deposition_synthesis_atmosphere_pressure_partial	Other	Proc.
Add_lay_back_deposition_synthesis_atmosphere_relative_humidity	Other	Proc.
Add_lay_back_deposition_solvents	Other	Proc.
Add_lay_back_deposition_solvents_mixing_ratios	Other	Proc.
Add_lay_back_deposition_solvents_supplier	Other	Proc.
Add_lay_back_deposition_solvents_purity	Other	Proc.
Add_lay_back_deposition_reaction_solutions_compounds	Other	Proc.
Add_lay_back_deposition_reaction_solutions_compounds_supplier	Other	Proc.
Add_lay_back_deposition_reaction_solutions_compounds_purity	Other	Proc.
Add_lay_back_deposition_reaction_solutions_concentrations	Other	Proc.
Add_lay_back_deposition_reaction_solutions_volumes	Other	Proc.
Add_lay_back_deposition_reaction_solutions_age	Other	Proc.
Add_lay_back_deposition_reaction_solutions_temperature	Other	Proc.
Add_lay_back_deposition_substrate_temperature	Other	Proc.
Add_lay_back_deposition_thermal_annealing_temperature	Other	Proc.
Add_lay_back_deposition_thermal_annealing_time	Other	Proc.
Add_lay_back_deposition_thermal_annealing_atmosphere	Other	Proc.
Add_lay_back_storage_time_until_next_deposition_step	Other	Proc.
Add_lay_back_storage_atmosphere	Other	Proc.
Add_lay_back_storage_relative_humidity	Other	Proc.
Add_lay_back_surface_treatment_before_next_deposition_step	Other	Proc.
Encapsulation	Other	Mat.
Encapsulation_stack_sequence	Other	Mat.
Encapsulation_edge_sealing_materials	Other	Mat.
Encapsulation_atmosphere_for_encapsulation	Other	Proc.
Encapsulation_water_vapour_transmission_rate	Other	Proc.
Encapsulation_oxygen_transmission_rate	Other	Proc.

## Sheet: Table S2
Table S2. Correspondence between abbreviations and chemical formulas in perovskite composition
Abbreviation	Chemical Formula
1.3-Pr(NH3)2	(C3H7(NH3)2)
n-C3H7NH3	(C3H7NH3)
pF1PEA	(FC6H4CH2CH2NH3)
oF1PEA	(FC6H4CH2CH2NH3)
N-EtPy	(C5H5NC2H5)
mF1PEA	(FC6H4CH2CH2NH3)
iso-BA	(C4H9NH3)
EU-pyP	(C20H12EuN4)
Cl-PEA	(ClC6H4CH2CH2NH3)
CH3ND3	(CH3NH3)
Br-PEA	(BrC6H4CH2CH2NH3)
5-AVAI	(COOH(CH2)4NH3)
PyrEA	(C5H5NC2H4NH3)
pFPEA	(FC6H4CH2CH2NH3)
oFPEA	(FC6H4CH2CH2NH3)
NMABr	(C10H7CH2NH3)
mFPEA	(FC6H4CH2CH2NH3)
H-PEA	(C6H5CH2CH2NH3)
f-PEA	(FC6H4CH2CH2NH3)
F-PEA	(FC6H4CH2CH2NH3)
F5PEA	(C6F5CH2CH2NH3)
APMim	(C7H14N3)
5-AVA	(COOH(CH2)4NH3)
4FPEA	(FC6H4CH2CH2NH3)
4APyH	(C5H6N2)
4ApyH	(C5H6N2)
4AMPY	(C6H7N2)
3AMPY	(C6H7N2)
ThMA	(SC4H3CH2NH3)
ThFA	(SC4H3CHNH2NH2)
TFEA	(CF3CH2NH2)
PyEA	(C5H5NC2H4NH3)
PPEA	(C6H5CNH3C2H3)
PDMA	(C6H4(CH2NH3)2)
MTEA	(CH3S(CH2)2NH3)
MIC3	((CH3)3C3HNS)
MIC2	((CH3)2C3H2NS)
MIC1	(CH3C3H3NS)
ImEA	(C3N2H4(CH2)2NH3)
HTAB	(C9H22N)
GABA	(COOH(CH2)3NH3)
F3EA	(CF3CH2NH3)
ClEA	(CH2ClCH2NH3)
CHMA	(C6H11CH2NH3)
CEPA	(ClC6H4C2H4NH3)
BzDA	(NH3CH2C6H4CH2NH3)
Anyl	(C6H5NH3)
FPEA	(FC6H4CH2CH2NH3)
4AMP	(C6H15N2)
3AMP	(C6H15N2)
TMA	((CH3)4N)
THM	(COOH(CH2)4NH3)
TEA	(SC4H3CH2CH2NH3)
TBA	((C4H9)4N)
PTA	(C6H5N(CH3)3)
PPA	(C6H5(CH2)3NH3)
PMA	(C6H5NH2CH3)
PGA	(HCCCH2NH3)
PEI	(C2H4NH)
Pei	(C2H4NH)
PDA	(C6H5N(CH3)3)
PBA	(C6H5(CH2)4NH3)
OdA	(NH3(CH2)8NH3)
NEA	(C10H7(CH2)2NH3)
iPA	(C3H5NH3)
IEA	(IC2H4NH3)
HEA	(OH(CH2)2NH3)
HdA	(NH3(CH2)6NH3)
HAD	(C6H12(NH3)2)
FEA	(CF3CH2NH3)
EPA	(C6H5(CH2)2NH3)
EDA	((CH2)2(NH2)2)
DPA	(C6H5NHCH3CH3)
DMA	((CH3)2NH2)
DAT	(NH3(CH2)8NH3)
DAP	((CH2)3(NH3)2)
BZA	(C7H7NH3)
BYA	(HCCCH2CNH3)
PEA	(C6H5(CH2)2NH3)
BIM	(C6H6N4)
BEA	(NH3(CH2)4NH3)
BdA	(NH3(CH2)4NH3)
BDA	(NH3C6H4NH3)
ALA	(C3H8N)
Ada	(C10H15)
Ace	(CH3C(NH2)2)
A43	((CF3)3CO(CH2)3NH3)
AVA	(COOH(CH2)4NH3)
TN	(C3H12N2)
TA	(C3H2NSNH3)
PR	(H3N(CH2)3NH3)
PN	(C3H10N2)
PA	(C3H5NH3)
OA	(C8H17NH3)
IA	(C3H5N2)
HA	(N2H5)
GU	((NH2)3C)
GA	(CH6N3)
FA	((NH2)2CH)
DI	((CH3)2NH2)
MA	(CH3NH3)
CA	(C3H8N)
BU	(H3N(CH2)4NH3)
IM	(C3N2H5)
BE	(C6H5CH2NH3)
DA	(C12H24NH3)
BA	(C4H9NH3)
AN	(C6H5NH3)
Aa	(CH3CNHNH3)
EA	(C2H5NH3)

## Sheet: Table S3
Table S3. Hyperparameters used in random forest regression
		min_samples_leaf	min_samples_split	n_estimators
w/o split	Dummy	2	3	240
1st split	Dummy	2	3	200
2nd split	Dummy	1	6	240
3rd split	Dummy	1	4	280
w/o split	Zero complement	2	6	230
1st split	Zero complement	1	3	270
2nd split	Zero complement	1	13	160
3rd split	Zero complement	1	4	300
w/o split	Median complement	1	3	220
1st split	Median complement	1	5	170
2nd split	Median complement	1	5	260
3rd split	Median complement	1	9	70

## Sheet: Table S4
Table S4. Comparison of all metrics of PCE regression by RF model using all columns of materials and processes
		R2_train	RMSE_train	MAE_train	R2_test	RMSE_test	MAE_test
w/o split	Dummy	0.861236	1.9203	1.32084	0.701863	2.78624	1.98139
1st split	Dummy	0.862445	1.91191	1.31455	0.702039	2.78541	1.98348
2nd split	Dummy	0.891289	1.69968	1.15726	0.703453	2.7788	1.95683
3rd split	Dummy	0.899693	1.63266	1.08846	0.705933	2.76715	1.94383
w/o split	Zero complement	0.857392	1.94672	1.34425	0.706142	2.76617	1.97787
1st split	Zero complement	0.908267	1.56133	1.02144	0.717656	2.71143	1.89408
2nd split	Zero complement	0.858899	1.9364	1.3848	0.698356	2.80257	2.00237
3rd split	Zero complement	0.89977	1.63203	1.08835	0.712648	2.73538	1.9196
w/o split	Median complement	0.907885	1.56458	1.02425	0.715331	2.72258	1.903
1st split	Median complement	0.897594	1.64966	1.1069	0.712458	2.73628	1.92049
2nd split	Median complement	0.896112	1.66155	1.11983	0.709856	2.74864	1.93319
3rd split	Median complement	0.873575	1.83293	1.27926	0.705981	2.76693	1.96468

## Sheet: Table S5
Table S5. Comparison of PCE regression by different combinations of data split and complements at the different train-test separation. The value is R2 of the test dataset
		random state = 1	random state = 2	random state = 3	random state = 4
w/o split	Dummy	0.696113	0.686544	0.699526	0.711631
1st split	Dummy	0.69837	0.689281	0.701181	0.713069
2nd split	Dummy	0.698939	0.688351	0.700903	0.715667
3rd split	Dummy	0.700958	0.69211	0.70206	0.718811
w/o split	Zero complement	0.69658	0.6841	0.701699	0.714002
1st split	Zero complement	0.710999	0.697416	0.709452	0.72277
2nd split	Zero complement	0.689094	0.680143	0.698154	0.707733
3rd split	Zero complement	0.705454	0.694117	0.707302	0.722545
w/o split	Median complement	0.705759	0.697377	0.706384	0.718089
1st split	Median complement	0.706388	0.695533	0.706614	0.715783
2nd split	Median complement	0.70384	0.691902	0.705467	0.719191
3rd split	Median complement	0.697711	0.685744	0.699191	0.714327

## Sheet: Table S6
Table S6. Sorted mean SHAP value
	Functional Layer	Materials or Process	weight_mean_shap
Perovskite_deposition_quenching_induced_crystallisation_True	Perovskite	Proc.	0.283242
HTL_stack_sequence_Spiro-MeOTAD	HTL	Mat.	0.0693442
Perovskite_deposition_solvents_DMF; DMSO	Perovskite	Proc.	0.0654061
HTL_stack_sequence_PTAA	HTL	Mat.	0.0497173
Perovskite_deposition_solvents_DMF; DMSO >> IPA	Perovskite	Proc.	0.048458
Perovskite_composition_a_ions_FA; MA	Perovskite	Mat.	0.040989
HTL_additives_compounds_Li-TFSI; TBP	HTL	Proc.	0.0354313
Substrate_stack_sequence_ ITO	Substrate	Mat.	0.0267352
ETL_deposition_procedure_ Spin-coating	ETL	Proc.	0.0221419
ETL_stack_sequence_PCBM-60	ETL	Mat.	0.0179112
Perovskite_deposition_solvents_mixing_ratios_4; 1	Perovskite	Proc.	0.0177276
Perovskite_deposition_procedure_Spin-coating >> Spin-coating	Perovskite	Proc.	0.0169863
Backcontact_deposition_procedure_Evaporation	Back contact	Proc.	0.0166527
Add_lay_back_deposition_aggregation_state_of_reactants_Unknown	Other	Proc.	0
Add_lay_back_deposition_procedure_Evaporation	Other	Proc.	9.06638e-07
Perovskite_deposition_procedure_Spin-coating	Perovskite	Proc.	0.014644
Backcontact_stack_sequence_Au	Back contact	Mat.	0.0128053
ETL_deposition_procedure_Spin-coating	ETL	Proc.	0.0101184
Substrate_stack_sequence_SLG	Substrate	Mat.	0.00982419
HTL_deposition_procedure_ Spin-coating	HTL	Proc.	0.00948178
HTL_additives_compounds_FK209; Li-TFSI; TBP	HTL	Proc.	0.00725435
HTL_deposition_procedure_Spin-coating	HTL	Proc.	0.00703002
HTL_deposition_procedure_Spin-coating	HTL	Proc.	0.00653292
ETL_deposition_procedure_Spray-pyrolys	ETL	Proc.	0.00591617
ETL_stack_sequence_SnO2-np	ETL	Mat.	0.00584609
Perovskite_deposition_thermal_annealing_temperature_Unknown >> 150.0	Perovskite	Proc.	0.00534256
ETL_stack_sequence_SnO2-c	ETL	Mat.	0.00514363
Perovskite_pl_max_770.0	Perovskite	Proc.	0.00496044
ETL_stack_sequence_ C60	ETL	Mat.	0.00464364
HTL_additives_compounds_Unknown	HTL	Proc.	0.00451604
ETL_stack_sequence_ C60	ETL	Mat.	0.00396646
Substrate_stack_sequence_ FTO	Substrate	Mat.	0.0037139
Perovskite_band_gap_1.6	Perovskite	Proc.	0.00370646
Perovskite_deposition_quenching_media_Diethyl ether	Perovskite	Proc.	0.00370076
Perovskite_composition_a_ions_Cs; FA; MA	Perovskite	Mat.	0.00300342
Perovskite_deposition_thermal_annealing_time_5.0	Perovskite	Proc.	0.00298976
ETL_deposition_procedure_CBD	ETL	Proc.	0.00297929
Perovskite_deposition_solvents_DMSO; GBL	Perovskite	Proc.	0.00288685
HTL_stack_sequence_ Spiro-MeOTAD	HTL	Mat.	0.00241319
Perovskite_composition_c_ions_Br; I	Perovskite	Mat.	0.00237817
Perovskite_deposition_solvents_mixing_ratios_9; 1 >> 1	Perovskite	Proc.	0.00213358
Perovskite_deposition_number_of_deposition_steps_1	Perovskite	Proc.	0.00207096
Perovskite_composition_c_ions_coefficients_1; 2	Perovskite	Mat.	0.00203561
Perovskite_deposition_aggregation_state_of_reactants_Liquid >> Liquid	Perovskite	Proc.	0.0020328
ETL_deposition_procedure_ Spin-coating	ETL	Proc.	0.00195298
Perovskite_deposition_thermal_annealing_time_40.0	Perovskite	Proc.	0.00167507
Add_lay_back_deposition_procedure_Unknown	Other	Proc.	0
Perovskite_pl_max_775.0	Perovskite	Proc.	0.00150301
Add_lay_back_deposition_reaction_solutions_age_Unknown	Other	Proc.	0
Backcontact_stack_sequence_ Ag	Back contact	Mat.	0.00142469
ETL_deposition_procedure_ Evaporation	ETL	Proc.	0.00139316
Perovskite_deposition_thermal_annealing_time_Unknown >> 10.0	Perovskite	Proc.	0.00139158
Perovskite_deposition_thermal_annealing_temperature_70.0	Perovskite	Proc.	0.00134833
ETL_stack_sequence_ [BMIM]BF4	ETL	Mat.	0.00132663
Perovskite_deposition_thermal_annealing_temperature_Unknown >> 150	Perovskite	Proc.	0.00127519
Perovskite_deposition_quenching_media_Chlorobenzene	Perovskite	Proc.	0.00122326
Perovskite_pl_max_780.0	Perovskite	Proc.	0.00120858
Perovskite_deposition_synthesis_atmosphere_Dry air >> Dry air	Perovskite	Proc.	0.00119883
Backcontact_stack_sequence_Cu	Back contact	Mat.	0.00117531
ETL_stack_sequence_C60	ETL	Mat.	0.00116723
Perovskite_composition_short_form_CsFAMAPbBrI	Perovskite	Mat.	0.00113901
HTL_additives_compounds_F4-TCNQ	HTL	Proc.	0.00111068
ETL_deposition_procedure_Evaporation	ETL	Proc.	0.00110729
Perovskite_deposition_solvent_annealing_True	Perovskite	Proc.	0.00110614
Backcontact_stack_sequence_MoO3	Back contact	Mat.	0.00103468
Add_lay_back_deposition_reaction_solutions_compounds_purity_Unknown	Other	Proc.	0
ETL_stack_sequence_ BCP	ETL	Mat.	0.0010191
ETL_stack_sequence_SnO2-c	ETL	Mat.	0.00101699
Perovskite_composition_short_form_MAPbBrI	Perovskite	Mat.	0.0010076
ETL_additives_compounds_Unknown	ETL	Proc.	0.000998186
ETL_stack_sequence_ZnO-np	ETL	Mat.	0.000997343
Add_lay_back_deposition_reaction_solutions_compounds_supplier_Unknown	Other	Proc.	0
Perovskite_deposition_procedure_Spin-coating >> Recrystallization	Perovskite	Proc.	0.000957967
Perovskite_deposition_thermal_annealing_temperature_95.0	Perovskite	Proc.	0.000933466
Backcontact_stack_sequence_Ag	Back contact	Mat.	0.000899197
HTL_additives_compounds_Cu(TFSI)2	HTL	Proc.	0.000877683
HTL_stack_sequence_PTAA	HTL	Mat.	0.000836238
Add_lay_back_deposition_reaction_solutions_temperature_Unknown	Other	Proc.	0
Perovskite_composition_c_ions_coefficients_0.45; 2.55	Perovskite	Mat.	0.0008039
Add_lay_back_deposition_reaction_solutions_volumes_Unknown	Other	Proc.	0
Add_lay_back_deposition_solvents_purity_Unknown	Other	Proc.	0
Perovskite_composition_b_ions_Sn	Perovskite	Mat.	0.000752378
Backcontact_deposition_solvents_Unknown	Back contact	Proc.	0.000731256
Perovskite_deposition_thermal_annealing_time_Unknown >> 20.0	Perovskite	Proc.	0.000720906
Perovskite_deposition_thermal_annealing_time_Unknown >> 8.0	Perovskite	Proc.	0.000700229
Add_lay_back_deposition_solvents_supplier_Unknown	Other	Proc.	0
Backcontact_stack_sequence_ Au	Back contact	Mat.	0.00068118
Perovskite_deposition_quenching_media_Anisole	Perovskite	Proc.	0.000645991
Perovskite_deposition_thermal_annealing_time_5.0; 10.0	Perovskite	Proc.	0.00064431
Add_lay_back_deposition_solvents_Unknown	Other	Proc.	0
Perovskite_band_gap_1.63	Perovskite	Proc.	0.000610677
ETL_stack_sequence_ SnO2-np	ETL	Mat.	0.000608441
Perovskite_deposition_thermal_annealing_temperature_120.0 >> 100.0	Perovskite	Proc.	0.000606206
Perovskite_composition_b_ions_ Pb	Perovskite	Mat.	0.000600294
Perovskite_additives_compounds_HI	Perovskite	Proc.	0.000580109
HTL_deposition_reaction_solutions_compounds_Li-TFSI; Spiro-MeOTAD; TBP	HTL	Proc.	0.000577248
Perovskite_deposition_solvents_DMSO	Perovskite	Proc.	0.000568017
ETL_deposition_thermal_annealing_temperature_Unknown	ETL	Proc.	0.000550189
Backcontact_deposition_procedure_Doctor blading	Back contact	Proc.	0.000549466
Perovskite_composition_short_form_FAMAPbBrI	Perovskite	Mat.	0.000548362
Add_lay_back_deposition_synthesis_atmosphere_Unknown	Other	Proc.	0
Perovskite_deposition_thermal_annealing_time_15.0 >> Unknown	Perovskite	Proc.	0.000528314
Perovskite_deposition_thermal_annealing_temperature_100.0 >> Unknown	Perovskite	Proc.	0.000523214
ETL_deposition_thermal_annealing_temperature_ 500	ETL	Proc.	0.000521095
HTL_deposition_reaction_solutions_compounds_purity_Unknown	HTL	Proc.	0.000511847
ETL_stack_sequence_PCBM-60; F8TBT	ETL	Mat.	0.000509309
HTL_deposition_procedure_ Evaporation	HTL	Proc.	0.00050363
Perovskite_deposition_thermal_annealing_temperature_110.0 >> 105.0	Perovskite	Proc.	0.000499377
Add_lay_back_deposition_thermal_annealing_atmosphere_Unknown	Other	Proc.	0
ETL_stack_sequence_ TiO2-mp	ETL	Mat.	0.000494572
Perovskite_additives_compounds_Acetate; Cl	Perovskite	Proc.	0.000483092
Perovskite_composition_b_ions_Pb	Perovskite	Mat.	0.000475686
Perovskite_composition_perovskite_ABC3_structure_True	Perovskite	Mat.	0.000467261
ETL_stack_sequence_ PCBSD	ETL	Mat.	0.000466299
ETL_deposition_procedure_ALD	ETL	Proc.	0.000465083
Perovskite_deposition_aggregation_state_of_reactants_Liquid >> Gas	Perovskite	Proc.	0.000464909
HTL_additives_concentrations_23 uL(90.9mg/mLACN); 39 uL	HTL	Proc.	0.000464894
HTL_deposition_procedure_Evaporation	HTL	Proc.	0.00045612
HTL_deposition_thermal_annealing_temperature_Unknown	HTL	Proc.	0.000437223
ETL_stack_sequence_ TiO2-c	ETL	Mat.	0.000417946
Perovskite_deposition_thermal_annealing_time_5.0 >> 5.0	Perovskite	Proc.	0.000412538
Add_lay_back_deposition_thermal_annealing_temperature_Unknown	Other	Proc.	0
HTL_stack_sequence_NiO-c	HTL	Mat.	0.000394286
Add_lay_back_deposition_thermal_annealing_time_Unknown	Other	Proc.	0
Add_lay_back_False	Other	Mat.	0
HTL_additives_compounds_F4-TCNQ	HTL	Proc.	0.000351397
HTL_stack_sequence_TPA-BPFN-TPA	HTL	Mat.	0.000347562
Perovskite_deposition_solvent_annealing_time_Unknown	Perovskite	Proc.	0.000340255
HTL_deposition_aggregation_state_of_reactants_Unknown	HTL	Proc.	0.00033011
Perovskite_band_gap_1.526	Perovskite	Proc.	0.000328851
Perovskite_deposition_quenching_media_Methyl acetate	Perovskite	Proc.	0.000328722
ETL_deposition_thermal_annealing_temperature_ 100	ETL	Proc.	0.000328253
Perovskite_deposition_solvents_acetonitrile	Perovskite	Proc.	0.000327847
Perovskite_composition_b_ions_coefficients_ 1	Perovskite	Mat.	0.000318303
Perovskite_composition_c_ions_ I	Perovskite	Mat.	0.000318049
Perovskite_composition_short_form_MAPbI	Perovskite	Mat.	0.000316362
ETL_deposition_solvents_ Water	ETL	Proc.	0.000313132
Perovskite_deposition_thermal_annealing_temperature_130.0	Perovskite	Proc.	0.000308302
Add_lay_back_function_Antireflection	Other	Proc.	-5.51601e-09
Add_lay_back_function_Dielectric mirror	Other	Proc.	3.20252e-07
Add_lay_back_function_Upconversion	Other	Proc.	6.32355e-07
Perovskite_additives_compounds_NH4SCN	Perovskite	Proc.	0.000300286
Perovskite_pl_max_778.0	Perovskite	Proc.	0.00029041
Perovskite_deposition_thermal_annealing_time_0.066	Perovskite	Proc.	0.00028943
HTL_additives_compounds_TS-CuPc	HTL	Proc.	0.000289011
Perovskite_dimension_3D_True	Perovskite	Proc.	0.000287817
Perovskite_band_gap_1.56	Perovskite	Proc.	0.000287729
Perovskite_deposition_thermal_annealing_time_30.0 >> 15.0	Perovskite	Proc.	0.000282093
Perovskite_deposition_thermal_annealing_temperature_400.0	Perovskite	Proc.	0.000273877
Add_lay_back_stack_sequence_MgF2	Other	Mat.	-1.76259e-07
Perovskite_deposition_solvents_mixing_ratios_12.5; 1 >> 3; 1	Perovskite	Proc.	0.000264966
Perovskite_deposition_solvents_DMF >> none	Perovskite	Proc.	0.000264783
Add_lay_back_stack_sequence_Unknown	Other	Mat.	0
ETL_deposition_procedure_ CBD	ETL	Proc.	0.000260246
Add_lay_back_storage_atmosphere_Unknown	Other	Proc.	0
ETL_stack_sequence_SnO2-np	ETL	Mat.	0.000253717
ETL_deposition_thermal_annealing_atmosphere_Unknown	ETL	Proc.	0.000253306
ETL_stack_sequence_ Zr(acac)4	ETL	Mat.	0.000253225
Perovskite_additives_compounds_H2O	Perovskite	Proc.	0.000251347
HTL_deposition_substrate_temperature_Unknown	HTL	Proc.	0.000245837
Add_lay_back_storage_time_until_next_deposition_step_Unknown	Other	Proc.	0
Perovskite_composition_a_ions_coefficients_0.85; 0.15	Perovskite	Mat.	0.000231199
HTL_additives_compounds_ Unknown	HTL	Proc.	0.0002287
HTL_stack_sequence_ TaTm	HTL	Mat.	0.000226616
ETL_surface_treatment_before_next_deposition_step_UV	ETL	Proc.	0.000220457
Perovskite_deposition_thermal_annealing_temperature_150; 100 >> 100	Perovskite	Proc.	0.000217301
Perovskite_deposition_thermal_annealing_temperature_350.0	Perovskite	Proc.	0.000216789
Perovskite_deposition_solvent_annealing_solvent_atmosphere_Chlorobenzene; DMF	Perovskite	Proc.	0.000216351
Add_lay_back_thickness_list_105.0	Other	Proc.	1.76837e-07
Perovskite_deposition_thermal_annealing_time_Unknown >> 15.0	Perovskite	Proc.	0.000208361
HTL_additives_compounds_Mo(tfd-COCF3)3	HTL	Proc.	0.000203885
ETL_deposition_thermal_annealing_time_ 60.0	ETL	Proc.	0.000202326
HTL_deposition_reaction_solutions_compounds_supplier_Unknown	HTL	Proc.	0.000200684
Perovskite_additives_compounds_Polyvinylbutyral	Perovskite	Proc.	0.000200538
ETL_stack_sequence_TEACl	ETL	Mat.	0.00019955
Add_lay_back_thickness_list_90.0	Other	Proc.	3.0758e-07
Perovskite_composition_short_form_CsPbBrI	Perovskite	Mat.	0.000196375
HTL_stack_sequence_RCP	HTL	Mat.	0.000194786
Perovskite_deposition_solvents_DMSO >> none	Perovskite	Proc.	0.000194558
Perovskite_deposition_solvents_mixing_ratios_4; 1 >> 1	Perovskite	Proc.	0.000192992
Add_lay_back_True	Other	Mat.	2.51837e-06
ETL_stack_sequence_ Bphen	ETL	Mat.	0.000190677
Perovskite_deposition_solvents_mixing_ratios_8; 1 >> 1	Perovskite	Proc.	0.0001905
Add_lay_front_deposition_aggregation_state_of_reactants_Unknown	Other	Proc.	0
Backcontact_stack_sequence_ Au	Back contact	Mat.	0.000189611
ETL_stack_sequence_ TmPyPB	ETL	Mat.	0.000189008
Substrate_stack_sequence_ AZO	Substrate	Mat.	0.000188447
Add_lay_front_deposition_procedure_Evaporation	Other	Proc.	1.45221e-06
Perovskite_deposition_thermal_annealing_temperature_70.0 >> 150.0	Perovskite	Proc.	0.000185294
Perovskite_additives_compounds_H2PO3	Perovskite	Proc.	0.00018416
Perovskite_additives_compounds_MACSN	Perovskite	Proc.	0.000183743
Add_lay_front_deposition_procedure_Unknown	Other	Proc.	0
HTL_additives_compounds_ Li-TFSI; TBP	HTL	Proc.	0.000180739
Add_lay_front_deposition_reaction_solutions_age_Unknown	Other	Proc.	0
Add_lay_front_deposition_reaction_solutions_compounds_purity_Unknown	Other	Proc.	0
Perovskite_deposition_thermal_annealing_temperature_80	Perovskite	Proc.	0.000174408
Perovskite_deposition_synthesis_atmosphere_N2 >> MAI; Vacuum	Perovskite	Proc.	0.000172824
Add_lay_front_deposition_reaction_solutions_compounds_supplier_Unknown	Other	Proc.	0
Perovskite_additives_compounds_NH4Cl	Perovskite	Proc.	0.000171912
Add_lay_front_deposition_reaction_solutions_temperature_Unknown	Other	Proc.	0
Perovskite_deposition_thermal_annealing_time_Unknown >> 3.0	Perovskite	Proc.	0.00016704
Perovskite_additives_compounds_PEG	Perovskite	Proc.	0.000163806
Perovskite_deposition_thermal_annealing_temperature_105	Perovskite	Proc.	0.000163136
Add_lay_front_deposition_reaction_solutions_volumes_Unknown	Other	Proc.	0
Perovskite_additives_compounds_NH4Cl; NH4SCN	Perovskite	Proc.	0.000161463
ETL_stack_sequence_ WO3	ETL	Mat.	0.000161083
Perovskite_deposition_thermal_annealing_temperature_100.0 >> 150.0	Perovskite	Proc.	0.00016053
Perovskite_deposition_solvents_mixing_ratios_7; 3 >> 1	Perovskite	Proc.	0.000160386
HTL_deposition_procedure_Spray-pyrolys	HTL	Proc.	0.000158794
Perovskite_dimension_2D_False	Perovskite	Proc.	0.000157767
Backcontact_deposition_thermal_annealing_temperature_Unknown	Back contact	Proc.	0.00015748
Add_lay_front_deposition_solvents_purity_Unknown	Other	Proc.	0
HTL_additives_compounds_Urea	HTL	Proc.	0.000156209
Add_lay_front_deposition_solvents_supplier_Unknown	Other	Proc.	0
Add_lay_front_deposition_solvents_Unknown	Other	Proc.	0
Perovskite_additives_concentrations_0.15	Perovskite	Proc.	0.000153281
Perovskite_deposition_thermal_annealing_time_120.0 >> 60.0	Perovskite	Proc.	0.000147972
Perovskite_composition_c_ions_coefficients_0.095; 0.905	Perovskite	Mat.	0.000147127
Perovskite_pl_max_763.0	Perovskite	Proc.	0.000146515
Perovskite_deposition_thermal_annealing_temperature_80 >> 80	Perovskite	Proc.	0.000145925
Add_lay_front_deposition_synthesis_atmosphere_Unknown	Other	Proc.	0
Perovskite_deposition_thermal_annealing_atmosphere_Unknown	Perovskite	Proc.	0.000144938
Backcontact_deposition_synthesis_atmosphere_Unknown	Back contact	Proc.	0.000143471
Perovskite_deposition_solvents_DMF; DMSO >> none	Perovskite	Proc.	0.000143332
ETL_additives_compounds_DMOAP	ETL	Proc.	0.000141672
HTL_additives_compounds_Cu	HTL	Proc.	0.000141645
Perovskite_deposition_quenching_media_Trifluorotoluene	Perovskite	Proc.	0.000138987
Perovskite_additives_compounds_I2	Perovskite	Proc.	0.000137846
Perovskite_composition_none_stoichiometry_components_in_excess_NH4Cl	Perovskite	Mat.	0.000136417
Perovskite_deposition_thermal_annealing_time_10.0 >> 1.7	Perovskite	Proc.	0.000136261
ETL_stack_sequence_ TiO2-nanofibres	ETL	Mat.	0.000136189
Perovskite_deposition_after_treatment_of_formed_perovskite_Washed with Ether	Perovskite	Proc.	0.000133753
Perovskite_additives_compounds_Hexamethylphosphoramide	Perovskite	Proc.	0.000133713
Perovskite_composition_b_ions_coefficients_1	Perovskite	Mat.	0.000133369
Add_lay_front_deposition_thermal_annealing_atmosphere_Unknown	Other	Proc.	0
Add_lay_front_deposition_thermal_annealing_temperature_Unknown	Other	Proc.	0
Perovskite_deposition_procedure_Co-evaporation	Perovskite	Proc.	0.000132589
HTL_additives_compounds_PSS-Na	HTL	Proc.	0.000130504
Perovskite_additives_compounds_Cl; PEO	Perovskite	Proc.	0.000127647
Perovskite_additives_compounds_Acetate	Perovskite	Proc.	0.000127124
HTL_deposition_solvents_mixing_ratios_1	HTL	Proc.	0.000126246
Add_lay_front_deposition_thermal_annealing_time_Unknown	Other	Proc.	0
Perovskite_deposition_reaction_solutions_concentrations_1.4 M	Perovskite	Proc.	0.000124475
Perovskite_additives_compounds_TBP	Perovskite	Proc.	0.000122913
Add_lay_front_False	Other	Mat.	0
HTL_additives_compounds_CuSCN	HTL	Proc.	0.000122071
Perovskite_additives_compounds_Pb(SCN)2	Perovskite	Proc.	0.00012179
Perovskite_additives_compounds_HBr	Perovskite	Proc.	0.000121626
Perovskite_deposition_thermal_annealing_time_20.0 >> 15.0	Perovskite	Proc.	0.000121338
Backcontact_deposition_procedure_ Evaporation	Back contact	Proc.	0.000121051
Perovskite_deposition_thermal_annealing_time_10.0; 10.0 >> 5.0	Perovskite	Proc.	0.000120624
Perovskite_deposition_thermal_annealing_temperature_210.0	Perovskite	Proc.	0.000120055
Perovskite_additives_concentrations_0.2	Perovskite	Proc.	0.000119855
ETL_additives_compounds_N; PEI	ETL	Proc.	0.00011964
Perovskite_additives_compounds_PVDF	Perovskite	Proc.	0.000119501
Perovskite_deposition_solvents_DMF; DMSO >> H2O; IPA	Perovskite	Proc.	0.000119459
Perovskite_deposition_solvents_DMF >> DMF; IPA	Perovskite	Proc.	0.000118399
Perovskite_deposition_thermal_annealing_temperature_350	Perovskite	Proc.	0.000118294
Perovskite_additives_compounds_Cl; NiO-np	Perovskite	Proc.	0.000118138
ETL_deposition_procedure_Unknown	ETL	Proc.	0.000117307
Perovskite_additives_compounds_EtOH; MA	Perovskite	Proc.	0.000116842
Perovskite_deposition_solvents_DMF >> Chlorobenzene; IPA	Perovskite	Proc.	0.000116237
ETL_deposition_procedure_RF sputtering	ETL	Proc.	0.000113239
HTL_additives_compounds_GeO2	HTL	Proc.	0.000113228
Perovskite_deposition_thermal_annealing_temperature_250.0	Perovskite	Proc.	0.00011125
ETL_stack_sequence_ Rhodamine 101	ETL	Mat.	0.000110263
ETL_stack_sequence_SrTiO3	ETL	Mat.	0.000109336
Perovskite_additives_compounds_Ag; Cl; rGO	Perovskite	Proc.	0.000108923
Perovskite_deposition_thermal_annealing_temperature_75.0 >> 100.0	Perovskite	Proc.	0.000108417
Perovskite_additives_compounds_EACl	Perovskite	Proc.	0.000108292
HTL_stack_sequence_BDTT:DPPD:TT	HTL	Mat.	0.00010772
Perovskite_deposition_solvents_acetonitrile; Methylamine	Perovskite	Proc.	0.000107456
ETL_stack_sequence_ MUTAB	ETL	Mat.	0.000107439
Perovskite_deposition_thermal_annealing_time_10.0 >> Unknown	Perovskite	Proc.	0.000106421
Perovskite_pl_max_771.0	Perovskite	Proc.	0.000106366
Perovskite_deposition_solvents_mixing_ratios_9; 1 >> 5; 95	Perovskite	Proc.	0.000105964
HTL_stack_sequence_ F6-TCNNQ; TaTm	HTL	Mat.	0.000105504
Perovskite_additives_compounds_Cl; I2	Perovskite	Proc.	0.000105076
ETL_deposition_thermal_annealing_temperature_400	ETL	Proc.	0.000104512
Perovskite_deposition_thermal_annealing_time_10.0 >> 120.0	Perovskite	Proc.	0.000104123
Perovskite_additives_compounds_TEOS	Perovskite	Proc.	0.000103049
Perovskite_composition_b_ions_coefficients_1	Perovskite	Mat.	0.000103013
HTL_additives_compounds_Sc3N@C80	HTL	Proc.	0.000102988
Perovskite_additives_compounds_YbCl3	Perovskite	Proc.	0.000101655
Perovskite_deposition_thermal_annealing_temperature_Unknown >> Unknown >> 70.0	Perovskite	Proc.	0.000100306
Perovskite_deposition_solvents_DMF; NMP	Perovskite	Proc.	0.000100115
ETL_deposition_reaction_solutions_compounds_supplier_Unknown	ETL	Proc.	9.91204e-05
Perovskite_additives_concentrations_0.02	Perovskite	Proc.	9.86775e-05
ETL_deposition_thermal_annealing_time_Unknown	ETL	Proc.	9.81755e-05
Perovskite_deposition_thermal_annealing_temperature_50; 85	Perovskite	Proc.	9.74032e-05
Perovskite_deposition_thermal_annealing_temperature_Unknown >> 135.0	Perovskite	Proc.	9.64024e-05
Perovskite_additives_compounds_Acetate; HPA	Perovskite	Proc.	9.63399e-05
Perovskite_deposition_thermal_annealing_time_15.0; 15.0 >> 15.0	Perovskite	Proc.	9.58714e-05
Perovskite_band_gap_1.79	Perovskite	Proc.	9.53828e-05
Perovskite_composition_c_ions_coefficients_13	Perovskite	Mat.	9.50944e-05
Add_lay_front_function_A.R.C.	Other	Proc.	1.4874e-06
Perovskite_additives_concentrations_0.017	Perovskite	Proc.	9.46825e-05
ETL_deposition_procedure_ Electrospinning	ETL	Proc.	9.33355e-05
Perovskite_deposition_thermal_annealing_temperature_40; 100	Perovskite	Proc.	9.29479e-05
Perovskite_composition_inorganic_False	Perovskite	Mat.	9.28052e-05
Add_lay_front_function_Antireflection	Other	Proc.	4.9313e-05
Perovskite_deposition_synthesis_atmosphere_Air >> MAI; Vacuum	Perovskite	Proc.	9.21716e-05
Backcontact_stack_sequence_ Ag	Back contact	Mat.	9.14598e-05
ETL_stack_sequence_ PEI	ETL	Mat.	9.12807e-05
Perovskite_additives_concentrations_42.9	Perovskite	Proc.	9.05263e-05
HTL_deposition_procedure_Dipp-coating	HTL	Proc.	8.97618e-05
HTL_additives_compounds_Sodium Citrate	HTL	Proc.	8.90554e-05
Perovskite_additives_concentrations_0.03	Perovskite	Proc.	8.88645e-05
Add_lay_front_function_Down conversion	Other	Proc.	1.16454e-05
Perovskite_deposition_solvent_annealing_solvent_atmosphere_DMSO	Perovskite	Proc.	8.83639e-05
Perovskite_additives_compounds_SnF2; TMA	Perovskite	Proc.	8.73033e-05
Perovskite_deposition_thermal_annealing_temperature_25; 75 >> 135	Perovskite	Proc.	8.6921e-05
Perovskite_deposition_thermal_annealing_time_1.5; 25.0	Perovskite	Proc.	8.62376e-05
HTL_additives_compounds_ D-sorbitol	HTL	Proc.	8.62115e-05
HTL_stack_sequence_pBBTa窶殖DT2	HTL	Mat.	8.59166e-05
HTL_additives_compounds_ox-Carbon-nano onions	HTL	Proc.	8.46788e-05
Perovskite_additives_compounds_xDMAI	Perovskite	Proc.	8.44446e-05
Perovskite_deposition_quenching_media_additives_compounds_Polyurethane	Perovskite	Proc.	8.4051e-05
Perovskite_composition_a_ions_coefficients_0.3; 0.7	Perovskite	Mat.	8.33267e-05
Perovskite_pl_max_805.0	Perovskite	Proc.	8.24575e-05
Perovskite_deposition_quenching_media_Chlorobenzene; H2O	Perovskite	Proc.	8.17568e-05
Perovskite_deposition_solvents_DMF >> Ethanol	Perovskite	Proc.	8.16169e-05
ETL_stack_sequence_ LiF	ETL	Mat.	8.12111e-05
Perovskite_additives_compounds_Acetate; H2O; Hypophosphorous acid	Perovskite	Proc.	8.11273e-05
Add_lay_front_function_Light management	Other	Proc.	-1.40495e-05
Perovskite_additives_concentrations_0.05; nan	Perovskite	Proc.	7.97704e-05
Perovskite_deposition_solvents_DMF >> Methanol	Perovskite	Proc.	7.92701e-05
HTL_additives_compounds_Carbon-nano onions	HTL	Proc.	7.8955e-05
Add_lay_front_function_Unknown	Other	Proc.	0
Perovskite_pl_max_776.5	Perovskite	Proc.	7.86391e-05
Add_lay_front_stack_sequence_ Au-np	Other	Mat.	3.25322e-06
HTL_additives_compounds_EMIC	HTL	Proc.	7.78754e-05
Perovskite_deposition_thermal_annealing_time_1.0; 9.0	Perovskite	Proc.	7.76772e-05
Perovskite_deposition_procedure_Evaporation >> Spin-coating	Perovskite	Proc.	7.64846e-05
Perovskite_additives_compounds_Sn	Perovskite	Proc.	7.64779e-05
Perovskite_deposition_after_treatment_of_formed_perovskite_Atmospheric-pressure dielectric barrier discharge	Perovskite	Proc.	7.64118e-05
Perovskite_additives_compounds_Carbon-nt; P3HT	Perovskite	Proc.	7.60931e-05
Perovskite_additives_compounds_DNA	Perovskite	Proc.	7.58212e-05
HTL_deposition_synthesis_atmosphere_N2	HTL	Proc.	7.54159e-05
Perovskite_additives_compounds_Pb(SCN)2; SnF2	Perovskite	Proc.	7.53416e-05
ETL_deposition_thermal_annealing_time_60.0	ETL	Proc.	7.52734e-05
ETL_deposition_thermal_annealing_temperature_150	ETL	Proc.	7.51663e-05
Perovskite_deposition_quenching_media_additives_compounds_PCBM-60	Perovskite	Proc.	7.47033e-05
Add_lay_front_stack_sequence_Ag-np	Other	Mat.	1.09972e-06
HTL_stack_sequence_ PEI-HI	HTL	Mat.	7.39116e-05
Perovskite_deposition_thermal_annealing_temperature_Unknown >> 125.0	Perovskite	Proc.	7.35745e-05
Perovskite_deposition_solvents_mixing_ratios_1 >> nan	Perovskite	Proc.	7.30374e-05
Perovskite_deposition_solvents_Methylammonium acetate	Perovskite	Proc.	7.19206e-05
Backcontact_stack_sequence_Graphite	Back contact	Mat.	7.18149e-05
Perovskite_additives_compounds_1-ethylpyridinium chloride	Perovskite	Proc.	7.15131e-05
ETL_deposition_procedure_ Dipp-coating	ETL	Proc.	7.12982e-05
Add_lay_front_stack_sequence_CdSeS-QDs	Other	Mat.	2.02913e-06
ETL_additives_compounds_ Graphene oxide	ETL	Proc.	7.09334e-05
Perovskite_deposition_thermal_annealing_temperature_60.0; 100.0	Perovskite	Proc.	7.06552e-05
HTL_additives_compounds_Li-TFSI; TBP; FK209	HTL	Proc.	7.06263e-05
Perovskite_deposition_thermal_annealing_time_2.0 >> 30.0	Perovskite	Proc.	7.03745e-05
Perovskite_additives_compounds_Urea	Perovskite	Proc.	7.01732e-05
Perovskite_additives_compounds_PbSCN2	Perovskite	Proc.	6.98707e-05
Perovskite_pl_max_774.0	Perovskite	Proc.	6.97146e-05
HTL_stack_sequence_NiO-c	HTL	Mat.	6.9681e-05
Perovskite_deposition_synthesis_atmosphere_N2 >> Air	Perovskite	Proc.	6.92653e-05
Perovskite_additives_concentrations_12 mg/ml	Perovskite	Proc.	6.89034e-05
Perovskite_additives_compounds_HCl	Perovskite	Proc.	6.88016e-05
Perovskite_additives_concentrations_0.04; 0.003	Perovskite	Proc.	6.87115e-05
HTL_deposition_solvents_purity_Unknown	HTL	Proc.	6.86085e-05
Perovskite_additives_compounds_PVP	Perovskite	Proc.	6.85136e-05
ETL_stack_sequence_Fe2O3	ETL	Mat.	6.79949e-05
HTL_stack_sequence_PFN; PTPD	HTL	Mat.	6.79441e-05
ETL_deposition_aggregation_state_of_reactants_Liquid	ETL	Proc.	6.79114e-05
Perovskite_deposition_quenching_media_liquid N2; N2	Perovskite	Proc.	6.78092e-05
Perovskite_dimension_list_of_layers_ 2.0	Perovskite	Proc.	6.74791e-05
Perovskite_deposition_thermal_annealing_time_Unknown >> Unknown >> 150.0	Perovskite	Proc.	6.63143e-05
Perovskite_additives_compounds_K	Perovskite	Proc.	6.55522e-05
HTL_stack_sequence_TaTm	HTL	Mat.	6.52156e-05
Perovskite_deposition_aggregation_state_of_reactants_Liquid >> Liquid >> Liquid	Perovskite	Proc.	6.51905e-05
Perovskite_additives_compounds_Graphene-nanofibers	Perovskite	Proc.	6.51729e-05
ETL_additives_compounds_Li-TFSI	ETL	Proc.	6.50389e-05
ETL_stack_sequence_ Graphene; Al2O3-mp	ETL	Mat.	6.47275e-05
ETL_stack_sequence_ SnO2-c	ETL	Mat.	6.43553e-05
Perovskite_additives_compounds_beta-cyclodextrin	Perovskite	Proc.	6.41535e-05
HTL_stack_sequence_PEAI	HTL	Mat.	6.4101e-05
Perovskite_additives_compounds_Cl; NH4I	Perovskite	Proc.	6.39174e-05
Add_lay_front_stack_sequence_Eu(TTA)2(Phen)MAA	Other	Mat.	6.23514e-07
Perovskite_additives_compounds_PEAI	Perovskite	Proc.	6.36987e-05
Perovskite_deposition_thermal_annealing_time_150.0	Perovskite	Proc.	6.36852e-05
ETL_deposition_procedure_Magnetron sputtering	ETL	Proc.	6.36692e-05
Perovskite_additives_compounds_PCBM-60	Perovskite	Proc.	6.36256e-05
Perovskite_deposition_solvents_mixing_ratios_1000; 128	Perovskite	Proc.	6.34056e-05
Perovskite_additives_compounds_MA(SCN)	Perovskite	Proc.	6.33771e-05
Perovskite_deposition_thermal_annealing_temperature_100 >> 70	Perovskite	Proc.	6.32215e-05
Perovskite_band_gap_1.3	Perovskite	Proc.	6.27219e-05
Backcontact_stack_sequence_PEDOT:PSS	Back contact	Mat.	6.27008e-05
Perovskite_pl_max_894.0	Perovskite	Proc.	6.22442e-05
HTL_additives_compounds_Cs	HTL	Proc.	6.17557e-05
Perovskite_composition_c_ions_coefficients_16	Perovskite	Mat.	6.16613e-05
Perovskite_composition_c_ions_coefficients_0.3; 2.7	Perovskite	Mat.	6.16171e-05
Perovskite_additives_concentrations_0.005	Perovskite	Proc.	6.13969e-05
ETL_additives_compounds_ Pluronic P-123	ETL	Proc.	6.10424e-05
Perovskite_deposition_thermal_annealing_time_Unknown >> 40.0	Perovskite	Proc.	6.07763e-05
ETL_additives_compounds_H2PtCl6	ETL	Proc.	6.06522e-05
Add_lay_front_stack_sequence_Eu-complex LDL	Other	Mat.	0
HTL_additives_compounds_JQ1; Li-TFSI; TBP	HTL	Proc.	6.00446e-05
Perovskite_additives_compounds_n-butyl amine; Cl	Perovskite	Proc.	5.99527e-05
Perovskite_additives_compounds_C60-PYP	Perovskite	Proc.	5.99526e-05
Perovskite_additives_concentrations_0.11	Perovskite	Proc.	5.9595e-05
Perovskite_deposition_reaction_solutions_compounds_purity_Unknown	Perovskite	Proc.	5.94211e-05
ETL_deposition_procedure_Spin-coating >> Solvent annealing	ETL	Proc.	5.92018e-05
Perovskite_additives_compounds_enI2; SnF2	Perovskite	Proc.	5.9041e-05
Perovskite_additives_compounds_PPC	Perovskite	Proc.	5.90292e-05
Add_lay_front_stack_sequence_INVAR	Other	Mat.	-1.68786e-08
Perovskite_additives_concentrations_0.0005	Perovskite	Proc.	5.87831e-05
Perovskite_deposition_synthesis_atmosphere_Vacuum >> Chlorobenzene; MAI	Perovskite	Proc.	5.80426e-05
ETL_stack_sequence_Nb2O5	ETL	Mat.	5.77379e-05
ETL_surface_treatment_before_next_deposition_step_ZnAl-LDH and thermal annealing	ETL	Proc.	5.76714e-05
HTL_additives_compounds_ FK209; Li-TFSI; TBP	HTL	Proc.	5.76623e-05
ETL_stack_sequence_ Al2O3-mp	ETL	Mat.	5.75553e-05
ETL_additives_compounds_ CTAB	ETL	Proc.	5.75169e-05
Perovskite_additives_compounds_IPA HCl	Perovskite	Proc.	5.72302e-05
Perovskite_deposition_thermal_annealing_temperature_Unknown >> 95.0	Perovskite	Proc.	5.70469e-05
Perovskite_deposition_thermal_annealing_time_25.0	Perovskite	Proc.	5.69736e-05
Add_lay_front_stack_sequence_LiF	Other	Mat.	0
ETL_stack_sequence_TiO2	ETL	Mat.	5.68535e-05
Perovskite_composition_none_stoichiometry_components_in_excess_Stoichiometric	Perovskite	Mat.	5.68009e-05
Perovskite_deposition_solvents_mixing_ratios_3; 2; 6	Perovskite	Proc.	5.6349e-05
Perovskite_deposition_thermal_annealing_time_1.0; 30.0	Perovskite	Proc.	5.632e-05
Cell_number_of_cells_per_substrate_20	Substrate	Proc.	5.62728e-05
Perovskite_additives_concentrations_0.0025	Perovskite	Proc.	5.61037e-05
HTL_stack_sequence_PEDOT:PSS; PEI	HTL	Mat.	5.60973e-05
Perovskite_additives_concentrations_1 wt%	Perovskite	Proc.	5.56692e-05
Perovskite_deposition_thermal_annealing_time_15.0; 45.0	Perovskite	Proc.	5.54871e-05
HTL_stack_sequence_A102	HTL	Mat.	5.54329e-05
HTL_stack_sequence_JY6	HTL	Mat.	5.52266e-05
HTL_additives_compounds_BCF	HTL	Proc.	5.51244e-05
Add_lay_front_stack_sequence_MgF2	Other	Mat.	2.65636e-07
Perovskite_additives_concentrations_nan; 0.01	Perovskite	Proc.	5.49994e-05
Perovskite_deposition_thermal_annealing_atmosphere_Unknown >> Unknown	Perovskite	Proc.	5.49203e-05
Perovskite_deposition_thermal_annealing_time_30.0 >> 20.0	Perovskite	Proc.	5.48767e-05
ETL_stack_sequence_ ITIC	ETL	Mat.	5.46932e-05
Perovskite_additives_compounds_FAOAc	Perovskite	Proc.	5.44934e-05
Perovskite_deposition_solvents_DMF; DMSO >> Ethanol; IPA	Perovskite	Proc.	5.43456e-05
HTL_additives_compounds_Eu	HTL	Proc.	5.43e-05
Perovskite_deposition_solvents_DMF; HCl	Perovskite	Proc.	5.39388e-05
Perovskite_band_gap_2.07	Perovskite	Proc.	5.38556e-05
Perovskite_deposition_quenching_media_additives_concentrations_10 mg/ml	Perovskite	Proc.	5.37429e-05
Perovskite_deposition_thermal_annealing_temperature_110; 115	Perovskite	Proc.	5.33579e-05
HTL_stack_sequence_TaTM	HTL	Mat.	5.31711e-05
Perovskite_additives_compounds_Ba	Perovskite	Proc.	5.29735e-05
HTL_stack_sequence_SDTCz2F	HTL	Mat.	5.28905e-05
Perovskite_additives_compounds_PC	Perovskite	Proc.	5.26269e-05
Perovskite_additives_compounds_Graphene-QDs	Perovskite	Proc.	5.26244e-05
Perovskite_additives_concentrations_0.1 M	Perovskite	Proc.	5.25968e-05
HTL_stack_sequence_m-MTDATA	HTL	Mat.	5.23016e-05
ETL_additives_compounds_ Graphene	ETL	Proc.	5.21941e-05
Perovskite_additives_compounds_Ag@SiO2-nw	Perovskite	Proc.	5.19867e-05
Backcontact_stack_sequence_ PEDOT:PSS	Back contact	Mat.	5.19193e-05
Backcontact_deposition_substrate_temperature_Unknown	Back contact	Proc.	5.15139e-05
Perovskite_deposition_thermal_annealing_time_10.0; 10.0 >> 150.0	Perovskite	Proc.	5.13922e-05
HTL_stack_sequence_P3CT-K	HTL	Mat.	5.11543e-05
ETL_deposition_solvents_supplier_Sigma Aldrich	ETL	Proc.	5.10836e-05
Perovskite_deposition_solvents_mixing_ratios_7.69; 1	Perovskite	Proc.	5.10712e-05
ETL_additives_compounds_Phen-I	ETL	Proc.	5.10631e-05
Perovskite_deposition_after_treatment_of_formed_perovskite_Washed with DMSO	Perovskite	Proc.	5.07292e-05
HTL_additives_compounds_KMnO4; Li-TFSI; TBP	HTL	Proc.	5.05425e-05
HTL_stack_sequence_BTF4	HTL	Mat.	5.04812e-05
Perovskite_deposition_quenching_media_additives_compounds_MAI	Perovskite	Proc.	5.03884e-05
Perovskite_additives_concentrations_25	Perovskite	Proc.	4.99625e-05
Perovskite_composition_a_ions_coefficients_2; 3	Perovskite	Mat.	4.99161e-05
Perovskite_additives_compounds_(adamantan窶・窶笥l)methanammonium; HI	Perovskite	Proc.	4.98445e-05
Perovskite_deposition_thermal_annealing_time_1.0; 25.0	Perovskite	Proc.	4.97788e-05
Perovskite_additives_concentrations_0.002	Perovskite	Proc.	4.94142e-05
Add_lay_front_stack_sequence_Mica	Other	Mat.	-1.1849e-05
Perovskite_deposition_quenching_media_additives_compounds_Spiro-MeOTAD	Perovskite	Proc.	4.91715e-05
Perovskite_deposition_reaction_solutions_compounds_supplier_Unknown	Perovskite	Proc.	4.91109e-05
Perovskite_additives_concentrations_0.15; 0.15	Perovskite	Proc.	4.90347e-05
Perovskite_deposition_solvents_DMF; NNP	Perovskite	Proc.	4.90318e-05
Perovskite_additives_compounds_PEO	Perovskite	Proc.	4.8869e-05
ETL_stack_sequence_ Au@TiO2-np; TiO2-mp	ETL	Mat.	4.88629e-05
Perovskite_deposition_thermal_annealing_time_Unknown >> 35.0	Perovskite	Proc.	4.87024e-05
ETL_additives_compounds_ SWCNTs	ETL	Proc.	4.85694e-05
HTL_stack_sequence_ITIC	HTL	Mat.	4.85302e-05
Perovskite_additives_compounds_PCBM-70	Perovskite	Proc.	4.77149e-05
Perovskite_deposition_solvents_mixing_ratios_26; 4	Perovskite	Proc.	4.73453e-05
Add_lay_front_stack_sequence_Mn:CsPbCl3-QDs	Other	Mat.	1.13382e-05
Perovskite_pl_max_773.0	Perovskite	Proc.	4.7003e-05
ETL_surface_treatment_before_next_deposition_step_CO2	ETL	Proc.	4.66471e-05
Perovskite_deposition_solvents_DMF; DMSO >> IPA >> IPA	Perovskite	Proc.	4.59992e-05
Perovskite_deposition_thermal_annealing_temperature_115.0	Perovskite	Proc.	4.57898e-05
ETL_stack_sequence_C60; PCBM-60	ETL	Mat.	4.56393e-05
Perovskite_composition_none_stoichiometry_components_in_excess_PbI2; PbBr2	Perovskite	Mat.	4.55219e-05
Perovskite_deposition_solvent_annealing_solvent_atmosphere_Diethylenetriamine	Perovskite	Proc.	4.54033e-05
Perovskite_additives_compounds_4-ABPACl	Perovskite	Proc.	4.53466e-05
ETL_stack_sequence_SnO2-c; SWCNTs	ETL	Mat.	4.52802e-05
ETL_stack_sequence_ TiO2-nanocones	ETL	Mat.	4.52079e-05
Perovskite_additives_compounds_NaYF4:Tb:Er-np	Perovskite	Proc.	4.51839e-05
HTL_stack_sequence_DERDTS-TBDT	HTL	Mat.	4.49814e-05
Perovskite_composition_b_ions_coefficients_4	Perovskite	Mat.	4.48105e-05
Perovskite_deposition_solvents_2-methoxyethanol; DMSO; GBL	Perovskite	Proc.	4.45726e-05
ETL_stack_sequence_ PCBA	ETL	Mat.	4.44184e-05
Perovskite_deposition_thermal_annealing_temperature_100.0 >> 140.0	Perovskite	Proc.	4.43635e-05
HTL_additives_compounds_Graphene Oxide	HTL	Proc.	4.40676e-05
Perovskite_deposition_aggregation_state_of_reactants_Unknown	Perovskite	Proc.	4.40156e-05
Perovskite_deposition_quenching_media_additives_compounds_H2O	Perovskite	Proc.	4.34171e-05
HTL_additives_compounds_GeO2-np	HTL	Proc.	4.32814e-05
Perovskite_deposition_solvents_mixing_ratios_3; 7; 0.5	Perovskite	Proc.	4.32292e-05
Perovskite_deposition_solvents_mixing_ratios_1000; 5	Perovskite	Proc.	4.32161e-05
Perovskite_additives_concentrations_15 mg/ml	Perovskite	Proc.	4.28263e-05
Perovskite_deposition_solvent_annealing_solvent_atmosphere_Chlorobenzene	Perovskite	Proc.	4.27936e-05
Substrate_deposition_procedure_ Commercial	Substrate	Proc.	4.27591e-05
HTL_stack_sequence_TBC-1	HTL	Mat.	4.24755e-05
ETL_additives_compounds_1-butyl-3-methylimidazolium tetrafluoroborate	ETL	Proc.	4.22681e-05
HTL_stack_sequence_DTB	HTL	Mat.	4.20603e-05
Perovskite_band_gap_2.31	Perovskite	Proc.	4.20601e-05
Perovskite_additives_concentrations_1 mg/ml	Perovskite	Proc.	4.19064e-05
ETL_additives_compounds_Mg	ETL	Proc.	4.16615e-05
Perovskite_deposition_reaction_solutions_age_Unknown	Perovskite	Proc.	4.14977e-05
HTL_additives_compounds_Li	HTL	Proc.	4.14255e-05
Perovskite_deposition_solvents_mixing_ratios_8; 1	Perovskite	Proc.	4.12934e-05
HTL_stack_sequence_CZ-STA; CZ-TA	HTL	Mat.	4.12728e-05
Substrate_cleaning_procedure_DIWater >> Ultrasonic bath >> Ethanol >> Ultrasonic bath >> Acetone >> Ultrasonic bath >> Oven drying >> UV-Ozone	Substrate	Proc.	4.12597e-05
HTL_additives_compounds_Li-TFSI; TPB	HTL	Proc.	4.12316e-05
Perovskite_additives_compounds_FABr	Perovskite	Proc.	4.10727e-05
Perovskite_deposition_synthesis_atmosphere_N2 >> Methylamin	Perovskite	Proc.	4.09958e-05
Perovskite_additives_compounds_DMAI	Perovskite	Proc.	4.0955e-05
HTL_surface_treatment_before_next_deposition_step_Ozone	HTL	Proc.	4.04436e-05
Perovskite_deposition_thermal_annealing_atmosphere_Air	Perovskite	Proc.	4.02247e-05
Perovskite_additives_compounds_Poly(styrene-co-butadiene)	Perovskite	Proc.	4.00937e-05
Perovskite_additives_concentrations_0.01 wt%	Perovskite	Proc.	3.9953e-05
Perovskite_deposition_thermal_annealing_time_4.0	Perovskite	Proc.	3.98268e-05
HTL_stack_sequence_BTF3	HTL	Mat.	3.98105e-05
Add_lay_front_stack_sequence_Moth eye PDMS	Other	Mat.	2.7453e-07
Perovskite_additives_concentrations_0.003	Perovskite	Proc.	3.97556e-05
HTL_additives_compounds_Co	HTL	Proc.	3.97534e-05
Perovskite_additives_compounds_MACl	Perovskite	Proc.	3.95871e-05
HTL_stack_sequence_Co-Porphyrin	HTL	Mat.	3.95481e-05
Perovskite_deposition_procedure_Spin-coating >> CBD >> Spin-coating	Perovskite	Proc.	3.93368e-05
HTL_deposition_synthesis_atmosphere_Unknown	HTL	Proc.	3.91513e-05
ETL_additives_compounds_Nb	ETL	Proc.	3.90849e-05
ETL_additives_compounds_Triton X-100	ETL	Proc.	3.90537e-05
Perovskite_deposition_procedure_Dropcasting >> Pneumatic pressure	Perovskite	Proc.	3.90428e-05
Perovskite_thickness	Perovskite	Proc.	3.89511e-05
Perovskite_additives_compounds_trihydrazine dihydriodide (THDH)	Perovskite	Proc.	3.88429e-05
HTL_additives_compounds_Li-TFSI; PMo11V; TBP	HTL	Proc.	3.87649e-05
Add_lay_front_stack_sequence_NaF	Other	Mat.	1.50491e-08
ETL_stack_sequence_ NiO-np	ETL	Mat.	3.84449e-05
Perovskite_deposition_thermal_annealing_temperature_65; 105	Perovskite	Proc.	3.83797e-05
Perovskite_additives_compounds_NMA	Perovskite	Proc.	3.80648e-05
Perovskite_composition_b_ions_coefficients_5	Perovskite	Mat.	3.79056e-05
Perovskite_deposition_thermal_annealing_temperature_70.0 >> 95.0	Perovskite	Proc.	3.77807e-05
Perovskite_deposition_solvents_mixing_ratios_9; 8	Perovskite	Proc.	3.76446e-05
Perovskite_additives_compounds_4-(1H-imidazol-3-ium-3-yl) butane-1-sulfonate	Perovskite	Proc.	3.75872e-05
Perovskite_deposition_reaction_solutions_concentrations_0.5 M >> 38 mg/ml	Perovskite	Proc.	3.75345e-05
Perovskite_deposition_solvents_acetonitrile; DMSO >> IPA	Perovskite	Proc.	3.7481e-05
Perovskite_deposition_thermal_annealing_time_0.133	Perovskite	Proc.	3.74299e-05
Perovskite_deposition_thermal_annealing_time_15.0 >> 60.0	Perovskite	Proc.	3.72894e-05
Perovskite_additives_concentrations_0.13 wt%	Perovskite	Proc.	3.7192e-05
Perovskite_additives_compounds_C60	Perovskite	Proc.	3.71548e-05
Perovskite_deposition_quenching_media_IPA	Perovskite	Proc.	3.70561e-05
HTL_stack_sequence_Au@SiO2-nw	HTL	Mat.	3.70474e-05
Perovskite_additives_concentrations_0.042	Perovskite	Proc.	3.6943e-05
Perovskite_additives_compounds_Ti3C2Tx	Perovskite	Proc.	3.6745e-05
Perovskite_band_gap_1.22	Perovskite	Proc.	3.67327e-05
Perovskite_pl_max_779.0	Perovskite	Proc.	3.66804e-05
Perovskite_deposition_thermal_annealing_time_65.0	Perovskite	Proc.	3.65893e-05
Add_lay_front_stack_sequence_NaYF4:Eu-np	Other	Mat.	6.70885e-06
Perovskite_deposition_thermal_annealing_temperature_Unknown	Perovskite	Proc.	3.65439e-05
ETL_additives_compounds_NaCl	ETL	Proc.	3.65095e-05
Perovskite_deposition_quenching_media_additives_compounds_Carbon black	Perovskite	Proc.	3.64738e-05
Perovskite_deposition_after_treatment_of_formed_perovskite_Micro contact inprinting	Perovskite	Proc.	3.63655e-05
ETL_additives_compounds_KCl	ETL	Proc.	3.62932e-05
HTL_stack_sequence_CH3O-PEIA	HTL	Mat.	3.62006e-05
Substrate_stack_sequence_ Ag-np	Substrate	Mat.	3.60551e-05
HTL_additives_concentrations_1 vol%; nan; nan	HTL	Proc.	3.60195e-05
HTL_additives_compounds_rGO	HTL	Proc.	3.59936e-05
Perovskite_deposition_procedure_Spin-coating >> Evaporation	Perovskite	Proc.	3.59562e-05
Perovskite_deposition_solvents_DMF; DMSO >> Chlorobenzene	Perovskite	Proc.	3.59271e-05
HTL_stack_sequence_mDPA-DBTP	HTL	Mat.	3.59176e-05
Perovskite_deposition_thermal_annealing_time_5.0 >> 10.0	Perovskite	Proc.	3.58905e-05
Add_lay_front_stack_sequence_N-Graphene-QDs	Other	Mat.	1.3113e-08
Perovskite_additives_concentrations_0.1 wt%	Perovskite	Proc.	3.54642e-05
Perovskite_deposition_solvents_DMF >> n-butyl alchohol	Perovskite	Proc.	3.54174e-05
Perovskite_deposition_after_treatment_of_formed_perovskite_UV radiation	Perovskite	Proc.	3.54003e-05
HTL_additives_compounds_CrO3	HTL	Proc.	3.53469e-05
HTL_stack_sequence_P(VDF-TrFE)	HTL	Mat.	3.52961e-05
Perovskite_deposition_thermal_annealing_temperature_100 >> 120; 100	Perovskite	Proc.	3.51466e-05
ETL_additives_compounds_rGS	ETL	Proc.	3.50529e-05
Backcontact_deposition_reaction_solutions_temperature_Unknown	Back contact	Proc.	3.49972e-05
Perovskite_additives_concentrations_0.1 mol%	Perovskite	Proc.	3.49656e-05
Perovskite_deposition_thermal_annealing_temperature_90.0 >> 250.0	Perovskite	Proc.	3.49407e-05
ETL_additives_compounds_DPM; OE	ETL	Proc.	3.49098e-05
Perovskite_additives_compounds_MPTS; Cl	Perovskite	Proc.	3.47868e-05
Perovskite_deposition_synthesis_atmosphere_Vacuum >> MAI; N2	Perovskite	Proc.	3.47472e-05
ETL_deposition_procedure_ Screen printing	ETL	Proc.	3.46161e-05
Perovskite_additives_concentrations_50 mM	Perovskite	Proc.	3.45007e-05
ETL_additives_compounds_DMBI	ETL	Proc.	3.42782e-05
HTL_stack_sequence_WT3	HTL	Mat.	3.38804e-05
Perovskite_additives_concentrations_6.67	Perovskite	Proc.	3.38343e-05
Perovskite_additives_concentrations_0.00026344676180021956	Perovskite	Proc.	3.36476e-05
Backcontact_stack_sequence_ITO	Back contact	Mat.	3.3585e-05
Perovskite_composition_b_ions_coefficients_0.5; 0.5	Perovskite	Mat.	3.34732e-05
Perovskite_additives_compounds_Li	Perovskite	Proc.	3.33546e-05
Perovskite_additives_concentrations_0.5 M	Perovskite	Proc.	3.32523e-05
HTL_stack_sequence_X25	HTL	Mat.	3.31926e-05
Perovskite_composition_b_ions_coefficients_0.1; 0.9	Perovskite	Mat.	3.31319e-05
ETL_deposition_procedure_Electrospraying	ETL	Proc.	3.31213e-05
Perovskite_deposition_solvents_mixing_ratios_1; 1.5	Perovskite	Proc.	3.29926e-05
Perovskite_deposition_solvent_annealing_solvent_atmosphere_Benzyl alcohol	Perovskite	Proc.	3.29341e-05
ETL_stack_sequence_PTEG-1	ETL	Mat.	3.29162e-05
Perovskite_additives_compounds_NaF	Perovskite	Proc.	3.29056e-05
HTL_additives_compounds_ Cu	HTL	Proc.	3.27666e-05
Perovskite_additives_concentrations_5 mg/ml	Perovskite	Proc.	3.27081e-05
ETL_additives_compounds_Zn	ETL	Proc.	3.26985e-05
Substrate_supplier_Nippon Sheet Glass Co.	Substrate	Proc.	3.24312e-05
Add_lay_front_stack_sequence_PDMS	Other	Mat.	-6.29638e-07
HTL_additives_compounds_Ag	HTL	Proc.	3.21829e-05
Perovskite_deposition_solvents_mixing_ratios_1; 19 >> 1	Perovskite	Proc.	3.21625e-05
Perovskite_additives_compounds_ABS	Perovskite	Proc.	3.21361e-05
Perovskite_deposition_thermal_annealing_temperature_80.0 >> 110.0	Perovskite	Proc.	3.20099e-05
Perovskite_deposition_thermal_annealing_time_10.0 >> 15.0	Perovskite	Proc.	3.20082e-05
Perovskite_deposition_after_treatment_of_formed_perovskite_Thermal radiation	Perovskite	Proc.	3.20053e-05
Perovskite_additives_compounds_5-AVAI	Perovskite	Proc.	3.19667e-05
HTL_stack_sequence_Ph-TPA-4A	HTL	Mat.	3.19284e-05
Add_lay_front_stack_sequence_Phosphor-in-glass	Other	Mat.	-1.93964e-06
Perovskite_deposition_thermal_annealing_time_5.0; 5.0 >> 5.0	Perovskite	Proc.	3.18683e-05
ETL_additives_compounds_ La	ETL	Proc.	3.17483e-05
Add_lay_front_stack_sequence_Polyimide	Other	Mat.	-3.12736e-06
Perovskite_composition_c_ions_coefficients_0.1; 2.9	Perovskite	Mat.	3.15115e-05
ETL_additives_compounds_Graphene-QDs	ETL	Proc.	3.14282e-05
Perovskite_deposition_thermal_annealing_time_3.0; 10.0 >> 3.0; 30.0	Perovskite	Proc.	3.14218e-05
HTL_additives_compounds_Ag-np	HTL	Proc.	3.14033e-05
Perovskite_additives_concentrations_10; 10	Perovskite	Proc.	3.12912e-05
HTL_stack_sequence_Graphene; P3HT	HTL	Mat.	3.12073e-05
HTL_stack_sequence_DBTMT	HTL	Mat.	3.11838e-05
HTL_stack_sequence_P3HT; SWCNTs	HTL	Mat.	3.10916e-05
Perovskite_deposition_solvents_mixing_ratios_600; 78	Perovskite	Proc.	3.10443e-05
HTL_stack_sequence_P3HT; Spiro-MeOTAD	HTL	Mat.	3.10359e-05
ETL_additives_compounds_TOPD	ETL	Proc.	3.09687e-05
Perovskite_additives_compounds_N2H5Cl	Perovskite	Proc.	3.09389e-05
HTL_additives_compounds_CI	HTL	Proc.	3.07916e-05
Perovskite_deposition_thermal_annealing_time_5.0; 20.0	Perovskite	Proc.	3.07859e-05
ETL_stack_sequence_EVA	ETL	Mat.	3.07437e-05
HTL_surface_treatment_before_next_deposition_step_UV-Ozone	HTL	Proc.	3.07153e-05
Perovskite_additives_compounds_Acetamidine hydrochloride	Perovskite	Proc.	3.05261e-05
Perovskite_deposition_solvents_mixing_ratios_7; 3; 4	Perovskite	Proc.	3.04698e-05
ETL_stack_sequence_ ZnO-nanowells	ETL	Mat.	3.04334e-05
HTL_additives_compounds_sGO	HTL	Proc.	3.03777e-05
Perovskite_deposition_solvents_mixing_ratios_8.8; 1	Perovskite	Proc.	3.03016e-05
Perovskite_deposition_solvents_supplier_Sigma Aldrich; Sigma Aldrich	Perovskite	Proc.	3.02951e-05
ETL_stack_sequence_TiO2; WOx	ETL	Mat.	3.02268e-05
Add_lay_front_stack_sequence_textured antireflective foil	Other	Mat.	1.28485e-06
Perovskite_deposition_quenching_media_additives_compounds_Undoped	Perovskite	Proc.	3.00932e-05
Perovskite_deposition_quenching_media_mixing_ratios_1; 0.2	Perovskite	Proc.	3.0055e-05
ETL_stack_sequence_BCP; PCBM-60	ETL	Mat.	2.99214e-05
Perovskite_composition_b_ions_coefficients_0.4; 0.6	Perovskite	Mat.	2.99126e-05
ETL_stack_sequence_ AZO-c	ETL	Mat.	2.98759e-05
HTL_additives_concentrations_22.5 uL; 15 uL	HTL	Proc.	2.98481e-05
Perovskite_storage_atmosphere_O2	Perovskite	Proc.	2.98401e-05
ETL_stack_sequence_ PCBM-60	ETL	Mat.	2.98349e-05
Perovskite_composition_c_ions_Br	Perovskite	Mat.	2.98181e-05
Perovskite_deposition_solvent_annealing_solvent_atmosphere_NMP	Perovskite	Proc.	2.97346e-05
Backcontact_stack_sequence_Graphen	Back contact	Mat.	2.96711e-05
HTL_stack_sequence_HTM	HTL	Mat.	2.9637e-05
Perovskite_deposition_thermal_annealing_temperature_175.0	Perovskite	Proc.	2.95484e-05
HTL_additives_compounds_PEO	HTL	Proc.	2.95094e-05
Perovskite_additives_compounds_Carbon-QDs	Perovskite	Proc.	2.94839e-05
Perovskite_additives_compounds_Cl; Spiro	Perovskite	Proc.	2.94051e-05
ETL_additives_compounds_Sn	ETL	Proc.	2.93387e-05
Perovskite_storage_relative_humidity_40.0	Perovskite	Proc.	2.93254e-05
Perovskite_additives_compounds_Cl; NAP 1-(3-aminopropylpyrrolidine)	Perovskite	Proc.	2.91101e-05
Perovskite_additives_concentrations_20 mg/ml	Perovskite	Proc.	2.90793e-05
Perovskite_additives_compounds_Ni	Perovskite	Proc.	2.9011e-05
HTL_stack_sequence_Graphene oxide; NiO-c	HTL	Mat.	2.90029e-05
Add_lay_front_stack_sequence_Unknown	Other	Mat.	0
Perovskite_band_gap_1.8	Perovskite	Proc.	2.88589e-05
ETL_stack_sequence_ CuI	ETL	Mat.	2.88568e-05
Perovskite_deposition_thermal_annealing_time_5.0 >> 60.0	Perovskite	Proc.	2.87405e-05
Perovskite_additives_compounds_Diphenylidonium hexafluoroarsenate; PCBOD	Perovskite	Proc.	2.87166e-05
HTL_additives_compounds_ T4-TCNQ	HTL	Proc.	2.85935e-05
Perovskite_deposition_thermal_annealing_temperature_Unknown >> 150; 120	Perovskite	Proc.	2.84572e-05
HTL_stack_sequence_CL1-2	HTL	Mat.	2.84297e-05
Perovskite_deposition_after_treatment_of_formed_perovskite_met_11s	Perovskite	Proc.	2.84213e-05
Perovskite_composition_a_ions_coefficients_0.81; 0.19	Perovskite	Mat.	2.83826e-05
Perovskite_additives_compounds_Ascorbic acid	Perovskite	Proc.	2.82573e-05
HTL_additives_compounds_K	HTL	Proc.	2.79176e-05
HTL_additives_compounds_Li-TFSI; TBP	HTL	Proc.	2.79031e-05
HTL_stack_sequence_S5	HTL	Mat.	2.7891e-05
Perovskite_deposition_after_treatment_of_formed_perovskite_Exposed to moist air	Perovskite	Proc.	2.78895e-05
Perovskite_additives_compounds_CsI	Perovskite	Proc.	2.78849e-05
Perovskite_deposition_synthesis_atmosphere_Air >> Air >> Air	Perovskite	Proc.	2.78193e-05
Perovskite_deposition_thermal_annealing_time_Unknown	Perovskite	Proc.	2.76885e-05
ETL_deposition_solvents_ a-Terpineol >> Ethanol	ETL	Proc.	2.76077e-05
Perovskite_deposition_thermal_annealing_temperature_60; 85	Perovskite	Proc.	2.75679e-05
HTL_additives_compounds_AMH	HTL	Proc.	2.75143e-05
ETL_stack_sequence_Carbon-QDs; SnO2-c	ETL	Mat.	2.74609e-05
ETL_stack_sequence_Au@TiO2-nw; TiO2-np	ETL	Mat.	2.7459e-05
ETL_additives_compounds_ Au-np	ETL	Proc.	2.73744e-05
HTL_stack_sequence_P3CT-N	HTL	Mat.	2.73584e-05
ETL_stack_sequence_Graphene; TiO2-c	ETL	Mat.	2.72574e-05
Perovskite_deposition_thermal_annealing_time_3.0; 5.0	Perovskite	Proc.	2.7204e-05
Perovskite_deposition_solvents_DMF >> Terpineol	Perovskite	Proc.	2.71728e-05
HTL_stack_sequence_ TPTPA	HTL	Mat.	2.71651e-05
Perovskite_deposition_thermal_annealing_time_30.0 >> 600.0	Perovskite	Proc.	2.70298e-05
Perovskite_additives_concentrations_33 mol%	Perovskite	Proc.	2.6927e-05
Perovskite_deposition_thermal_annealing_atmosphere_N2	Perovskite	Proc.	2.69137e-05
HTL_stack_sequence_TAPC	HTL	Mat.	2.69021e-05
ETL_additives_compounds_PEI	ETL	Proc.	2.68892e-05
HTL_additives_compounds_Sr	HTL	Proc.	2.68541e-05
ETL_additives_compounds_Acetic Acid	ETL	Proc.	2.66978e-05
HTL_additives_compounds_DMSO	HTL	Proc.	2.66728e-05
HTL_additives_compounds_FK209; FN-Br; TBP	HTL	Proc.	2.66137e-05
ETL_stack_sequence_ CPTA	ETL	Mat.	2.64298e-05
Perovskite_deposition_after_treatment_of_formed_perovskite_Annealed under light	Perovskite	Proc.	2.63797e-05
Perovskite_deposition_solvent_annealing_timing_After	Perovskite	Proc.	2.63542e-05
ETL_stack_sequence_ MgO-c	ETL	Mat.	2.63442e-05
ETL_additives_compounds_CF4	ETL	Proc.	2.63263e-05
Perovskite_deposition_solvents_Methylamine >> Methylamine	Perovskite	Proc.	2.62239e-05
ETL_deposition_reaction_solutions_age_8.0	ETL	Proc.	2.60235e-05
HTL_stack_sequence_CMO	HTL	Mat.	2.59853e-05
Perovskite_additives_compounds_Cl; PCDTBT	Perovskite	Proc.	2.59688e-05
HTL_additives_concentrations_0.1	HTL	Proc.	2.5851e-05
Perovskite_deposition_thermal_annealing_temperature_50; 60; 70; 80; 90; 100	Perovskite	Proc.	2.57987e-05
HTL_stack_sequence_H7	HTL	Mat.	2.57983e-05
Perovskite_additives_compounds_G-NH2	Perovskite	Proc.	2.57538e-05
ETL_additives_compounds_ B; F; PEI	ETL	Proc.	2.56082e-05
HTL_stack_sequence_Bifluo	HTL	Mat.	2.55955e-05
ETL_additives_compounds_Li-TFSI; TiCl4	ETL	Proc.	2.55711e-05
Perovskite_additives_compounds_CsI; OIH	Perovskite	Proc.	2.55699e-05
Perovskite_additives_concentrations_2.5 vol%	Perovskite	Proc.	2.55682e-05
Perovskite_pl_max_791.0	Perovskite	Proc.	2.55239e-05
Backcontact_stack_sequence_ ITO	Back contact	Mat.	2.54816e-05
HTL_additives_compounds_Cu	HTL	Proc.	2.54407e-05
Perovskite_additives_compounds_Melaminium iodine	Perovskite	Proc.	2.54023e-05
HTL_deposition_solvents_supplier_Sigma Aldrich	HTL	Proc.	2.53605e-05
Perovskite_deposition_after_treatment_of_formed_perovskite_Washed with Chlorobenzene	Perovskite	Proc.	2.53583e-05
HTL_stack_sequence_2窶紳minoterephthalic acid	HTL	Mat.	2.53143e-05
Add_lay_front_stack_sequence_Y2O3:Eu3	Other	Mat.	-1.40192e-06
Perovskite_additives_compounds_Zr(AC)4	Perovskite	Proc.	2.52856e-05
Perovskite_deposition_reaction_solutions_compounds_HCOOCs; HPbBr3; HPbI3	Perovskite	Proc.	2.52436e-05
Backcontact_deposition_aggregation_state_of_reactants_Gas	Back contact	Proc.	2.5214e-05
Perovskite_additives_compounds_PCBB-OEG	Perovskite	Proc.	2.51713e-05
Perovskite_deposition_thermal_annealing_time_60.0; 10.0	Perovskite	Proc.	2.51232e-05
Perovskite_deposition_thermal_annealing_time_Unknown >> 120.0	Perovskite	Proc.	2.50925e-05
ETL_surface_treatment_before_next_deposition_step_Plasma	ETL	Proc.	2.50562e-05
HTL_additives_compounds_Pd	HTL	Proc.	2.50151e-05
Perovskite_additives_compounds_Au@Ag@SiO2-np	Perovskite	Proc.	2.49459e-05
ETL_stack_sequence_BenMeIM-Cl	ETL	Mat.	2.48946e-05
Perovskite_deposition_quenching_media_additives_concentrations_0.015	Perovskite	Proc.	2.48198e-05
Perovskite_deposition_quenching_media_Ethyl acetate; Petroleum ether	Perovskite	Proc.	2.48179e-05
HTL_additives_compounds_Ca	HTL	Proc.	2.46994e-05
Perovskite_deposition_thermal_annealing_time_Unknown >> 2.0	Perovskite	Proc.	2.45958e-05
ETL_deposition_procedure_Screen printing	ETL	Proc.	2.45855e-05
Perovskite_deposition_thermal_annealing_temperature_25.0 >> 100.0	Perovskite	Proc.	2.45763e-05
ETL_additives_compounds_Graphene	ETL	Proc.	2.45059e-05
Perovskite_storage_relative_humidity_30.0	Perovskite	Proc.	2.44929e-05
ETL_additives_compounds_CNT	ETL	Proc.	2.44213e-05
HTL_deposition_thermal_annealing_temperature_25 >> 450	HTL	Proc.	2.42932e-05
Perovskite_deposition_thermal_annealing_time_10.0; 30.0; 90.0	Perovskite	Proc.	2.42844e-05
Perovskite_deposition_thermal_annealing_temperature_200; 150	Perovskite	Proc.	2.4258e-05
ETL_stack_sequence_C60; Phlm	ETL	Mat.	2.42329e-05
Perovskite_deposition_synthesis_atmosphere_relative_humidity_20	Perovskite	Proc.	2.41991e-05
ETL_stack_sequence_ Na2SO4	ETL	Mat.	2.41833e-05
ETL_stack_sequence_ WPF窶・窶塵xy窶色	ETL	Mat.	2.41532e-05
Perovskite_deposition_thermal_annealing_temperature_ 115.0	Perovskite	Proc.	2.40838e-05
HTL_stack_sequence_DCZ-OMeTAD	HTL	Mat.	2.39471e-05
Perovskite_composition_short_form_(PEA)MAPbI	Perovskite	Mat.	2.39225e-05
HTL_deposition_solvents_Chlorobenzene	HTL	Proc.	2.39075e-05
HTL_stack_sequence_SGT-421	HTL	Mat.	2.38862e-05
Perovskite_deposition_solvents_DMF; DMSO; NMP	Perovskite	Proc.	2.3863e-05
Perovskite_composition_short_form_FASnI	Perovskite	Mat.	2.38397e-05
ETL_additives_compounds_Na2S	ETL	Proc.	2.37686e-05
Perovskite_deposition_thermal_annealing_temperature_40; 70 >> 40; 100	Perovskite	Proc.	2.36964e-05
HTL_stack_sequence_3-F-br-4C	HTL	Mat.	2.36829e-05
ETL_additives_compounds_PMMA	ETL	Proc.	2.36302e-05
Substrate_stack_sequence_ Au-np; Graphene; TFSA	Substrate	Mat.	2.36269e-05
Perovskite_additives_compounds_Cl; HI	Perovskite	Proc.	2.36199e-05
Perovskite_additives_concentrations_5	Perovskite	Proc.	2.35919e-05
Perovskite_deposition_thermal_annealing_time_5.0; 5.0 >> 5.0; 5.0	Perovskite	Proc.	2.35547e-05
Perovskite_deposition_thermal_annealing_temperature_45; 100 >> 100	Perovskite	Proc.	2.35363e-05
Perovskite_deposition_thermal_annealing_time_Unknown >> Unknown >> 5.0	Perovskite	Proc.	2.34947e-05
Perovskite_deposition_thermal_annealing_temperature_20; 100	Perovskite	Proc.	2.34893e-05
Perovskite_additives_compounds_Trimesic acid	Perovskite	Proc.	2.34232e-05
Perovskite_deposition_thermal_annealing_temperature_70.0 >> 110.0	Perovskite	Proc.	2.34148e-05
Perovskite_deposition_after_treatment_of_formed_perovskite_met_40 mW/cm2	Perovskite	Proc.	2.33958e-05
Perovskite_deposition_solvent_annealing_solvent_atmosphere_DMF; DMSO	Perovskite	Proc.	2.33392e-05
Perovskite_additives_compounds_SP-3D-COF 1	Perovskite	Proc.	2.33096e-05
ETL_stack_sequence_PEG; ZnO-np	ETL	Mat.	2.31638e-05
Perovskite_additives_concentrations_0.015	Perovskite	Proc.	2.31333e-05
HTL_stack_sequence_JY5	HTL	Mat.	2.31136e-05
Perovskite_additives_compounds_DIFA	Perovskite	Proc.	2.30924e-05
Perovskite_composition_none_stoichiometry_components_in_excess_FA	Perovskite	Mat.	2.3023e-05
ETL_deposition_procedure_Oxygen plasma treatment	ETL	Proc.	2.29918e-05
Perovskite_deposition_synthesis_atmosphere_relative_humidity_50 >> 50	Perovskite	Proc.	2.29195e-05
Perovskite_additives_compounds_Cl; TBAB	Perovskite	Proc.	2.28957e-05
ETL_stack_sequence_IDIC	ETL	Mat.	2.28884e-05
Perovskite_additives_compounds_HPA	Perovskite	Proc.	2.28881e-05
Add_lay_front_stack_sequence_Y2O3:Eu3	Other	Mat.	3.04989e-06
Add_lay_front_stack_sequence_ZnSe-QDs	Other	Mat.	-1.15548e-06
ETL_stack_sequence_ m-PYBrZnPor	ETL	Mat.	2.27627e-05
Perovskite_composition_c_ions_coefficients_0.2; 2.8	Perovskite	Mat.	2.27432e-05
Perovskite_additives_concentrations_50 mol%	Perovskite	Proc.	2.27118e-05
Perovskite_deposition_thermal_annealing_temperature_70.0 >> 135.0	Perovskite	Proc.	2.26791e-05
Perovskite_deposition_synthesis_atmosphere_N2 >> Methylamin; N2	Perovskite	Proc.	2.26395e-05
Add_lay_front_storage_atmosphere_Unknown	Other	Proc.	0
ETL_stack_sequence_ C70	ETL	Mat.	2.25048e-05
HTL_additives_compounds_NiPcS4	HTL	Proc.	2.24596e-05
HTL_stack_sequence_MeO-PheDOT	HTL	Mat.	2.24284e-05
Perovskite_deposition_thermal_annealing_temperature_75.0 >> 135.0	Perovskite	Proc.	2.24035e-05
HTL_stack_sequence_MeO-2PACz	HTL	Mat.	2.23856e-05
Perovskite_deposition_procedure_Spin-coating >> Dipp-coating	Perovskite	Proc.	2.23825e-05
ETL_stack_sequence_ BACl	ETL	Mat.	2.23675e-05
ETL_additives_compounds_ H	ETL	Proc.	2.23564e-05
Perovskite_additives_compounds_NaYF4:Yb:Er-np	Perovskite	Proc.	2.23476e-05
HTL_stack_sequence_NiMgLiO-c	HTL	Mat.	2.23242e-05
Perovskite_additives_compounds_Cl; MAAc	Perovskite	Proc.	2.22961e-05
Perovskite_additives_compounds_Lead acetate	Perovskite	Proc.	2.22721e-05
Perovskite_deposition_quenching_media_Thermal radiation	Perovskite	Proc.	2.22193e-05
Perovskite_deposition_thermal_annealing_time_2.0; 3.0	Perovskite	Proc.	2.22083e-05
Perovskite_deposition_synthesis_atmosphere_DMSO; N2 >> N2	Perovskite	Proc.	2.22033e-05
HTL_stack_sequence_DR3TBDTT; PDMS	HTL	Mat.	2.21887e-05
Perovskite_band_gap_1.614	Perovskite	Proc.	2.21679e-05
Perovskite_deposition_thermal_annealing_time_150.0; 15.0 >> 30.0	Perovskite	Proc.	2.21141e-05
HTL_stack_sequence_VB-Me-FDPA	HTL	Mat.	2.20979e-05
ETL_additives_compounds_EDTA	ETL	Proc.	2.20962e-05
ETL_deposition_substrate_temperature_Unknown	ETL	Proc.	2.20156e-05
Perovskite_composition_b_ions_coefficients_0.6; 0.4	Perovskite	Mat.	2.20123e-05
Perovskite_additives_concentrations_5 %; nan	Perovskite	Proc.	2.19871e-05
HTL_deposition_procedure_Spin-coating >> Spin-coating	HTL	Proc.	2.18642e-05
Perovskite_composition_none_stoichiometry_components_in_excess_MAI; PEAI; DMF	Perovskite	Mat.	2.18583e-05
Substrate_etching_procedure_Zn-powder; HCl >> Mecanical scrubbing	Substrate	Proc.	2.18163e-05
Perovskite_deposition_thermal_annealing_temperature_60; 70; 80; 90; 100; 100	Perovskite	Proc.	2.16774e-05
Perovskite_deposition_after_treatment_of_formed_perovskite_Dissolving polystyren template in toluene	Perovskite	Proc.	2.16718e-05
Perovskite_additives_compounds_2-pyridylthiourea	Perovskite	Proc.	2.16307e-05
HTL_stack_sequence_Polyacrylonitrile-grafted rGO	HTL	Mat.	2.16185e-05
ETL_deposition_synthesis_atmosphere_ Vacuum	ETL	Proc.	2.16079e-05
Perovskite_deposition_reaction_solutions_volumes_Unknown	Perovskite	Proc.	2.16033e-05
Perovskite_additives_compounds_Graphene oxide	Perovskite	Proc.	2.15995e-05
Perovskite_deposition_solvents_Methanol; THF	Perovskite	Proc.	2.15558e-05
HTL_stack_sequence_Crosslinked TCTA-BVP	HTL	Mat.	2.15401e-05
HTL_additives_compounds_FK209; Zn(TFSI)2; TBP	HTL	Proc.	2.14751e-05
Perovskite_deposition_solvents_Dimethylacetamide; NMP	Perovskite	Proc.	2.14688e-05
Perovskite_additives_compounds_g-CNI	Perovskite	Proc.	2.13329e-05
Perovskite_additives_compounds_PTN-Br; SnF2	Perovskite	Proc.	2.13234e-05
HTL_stack_sequence_Spiro-CPDT	HTL	Mat.	2.13211e-05
ETL_additives_compounds_Bphen	ETL	Proc.	2.13022e-05
HTL_additives_compounds_Ba	HTL	Proc.	2.12997e-05
Perovskite_deposition_thermal_annealing_temperature_60; 130	Perovskite	Proc.	2.12508e-05
Add_lay_front_storage_time_until_next_deposition_step_Unknown	Other	Proc.	0
Perovskite_deposition_solvents_DMF; NMP >> IPA	Perovskite	Proc.	2.11909e-05
Add_lay_front_thickness_list_100.0	Other	Proc.	6.92814e-07
Perovskite_additives_compounds_Cl; ZnO-np	Perovskite	Proc.	2.11683e-05
ETL_additives_compounds_Al	ETL	Proc.	2.11077e-05
Perovskite_deposition_solvents_mixing_ratios_10; 9	Perovskite	Proc.	2.11036e-05
Perovskite_deposition_thermal_annealing_temperature_Unknown >> 50.0	Perovskite	Proc.	2.11006e-05
Perovskite_deposition_reaction_solutions_concentrations_0.72 M; 0.72 M; 0.08 M	Perovskite	Proc.	2.10986e-05
ETL_stack_sequence_ZrO2-c	ETL	Mat.	2.10934e-05
Substrate_deposition_procedure_Unknown	Substrate	Proc.	2.10802e-05
ETL_stack_sequence_IBF-Ep	ETL	Mat.	2.10723e-05
ETL_stack_sequence_CPTA-E	ETL	Mat.	2.09983e-05
Perovskite_additives_concentrations_100 mol%	Perovskite	Proc.	2.0942e-05
Perovskite_deposition_procedure_Spin-coating >> Dropcasting >> Spin-coating	Perovskite	Proc.	2.08945e-05
HTL_stack_sequence_HL-2	HTL	Mat.	2.08866e-05
Perovskite_additives_compounds_Thiourea	Perovskite	Proc.	2.08485e-05
ETL_additives_compounds_ TPFPB; LiClO4	ETL	Proc.	2.08358e-05
ETL_stack_sequence_NDI-P	ETL	Mat.	2.08029e-05
Perovskite_additives_concentrations_0.4	Perovskite	Proc.	2.07982e-05
Perovskite_pl_max_764.0	Perovskite	Proc.	2.07762e-05
ETL_stack_sequence_ Trimethylamine oxide	ETL	Mat.	2.07092e-05
Perovskite_additives_compounds_3-phenyl-2-propen-1-amine iodide	Perovskite	Proc.	2.06148e-05
Perovskite_deposition_thermal_annealing_temperature_220; 105	Perovskite	Proc.	2.0553e-05
Perovskite_deposition_thermal_annealing_temperature_90.0 >> 100.0	Perovskite	Proc.	2.04875e-05
HTL_deposition_solvents_ Chlorobenzene	HTL	Proc.	2.0472e-05
ETL_deposition_procedure_Electrodeposition	ETL	Proc.	2.04512e-05
Perovskite_deposition_thermal_annealing_temperature_70.0 >> 70.0; 70.0	Perovskite	Proc.	2.044e-05
Perovskite_additives_compounds_Graphdyine	Perovskite	Proc.	2.04226e-05
Perovskite_additives_concentrations_0.6 wt.%	Perovskite	Proc.	2.04153e-05
ETL_stack_sequence_Au-np; SnO2-np	ETL	Mat.	2.04034e-05
Perovskite_deposition_solvents_mixing_ratios_1 >> 9; 1	Perovskite	Proc.	2.03794e-05
ETL_deposition_procedure_Sputtering >> Electrochemical anodization	ETL	Proc.	2.03099e-05
HTL_stack_sequence_mp-SFX-2PA	HTL	Mat.	2.03084e-05
HTL_stack_sequence_3-Hexylthiophene	HTL	Mat.	2.03074e-05
ETL_stack_sequence_Zr(acac)4	ETL	Mat.	2.0295e-05
Perovskite_additives_compounds_NH4Cl; SnF2	Perovskite	Proc.	2.0295e-05
Perovskite_additives_compounds_FeOOH-QDs	Perovskite	Proc.	2.02438e-05
Perovskite_additives_concentrations_0.333; 0.009	Perovskite	Proc.	2.01153e-05
ETL_additives_concentrations_0.01	ETL	Proc.	2.00792e-05
Perovskite_additives_concentrations_0.1; 0.075	Perovskite	Proc.	2.00427e-05
Perovskite_additives_concentrations_0.04	Perovskite	Proc.	2.00174e-05
Perovskite_additives_concentrations_nan; 7	Perovskite	Proc.	2.00125e-05
Perovskite_deposition_thermal_annealing_temperature_300.0	Perovskite	Proc.	1.99776e-05
Perovskite_deposition_thermal_annealing_temperature_70; 120	Perovskite	Proc.	1.9933e-05
ETL_stack_sequence_ Bphen	ETL	Mat.	1.99305e-05
HTL_stack_sequence_Cz-Pyr	HTL	Mat.	1.99092e-05
Perovskite_additives_compounds_PbAc2	Perovskite	Proc.	1.99077e-05
ETL_stack_sequence_ AZO-np	ETL	Mat.	1.99069e-05
Perovskite_dimension_3D_with_2D_capping_layer_True	Perovskite	Proc.	1.99004e-05
Perovskite_pl_max_715.0	Perovskite	Proc.	1.98592e-05
Perovskite_deposition_solvents_mixing_ratios_9; 1.1	Perovskite	Proc.	1.97319e-05
Perovskite_deposition_thermal_annealing_temperature_60 >> 250	Perovskite	Proc.	1.97077e-05
Perovskite_composition_short_form_(pF1PEA)MAPbI	Perovskite	Mat.	1.96731e-05
HTL_additives_compounds_BCF; Li-TFSI; TBP	HTL	Proc.	1.96694e-05
Backcontact_stack_sequence_Ba	Back contact	Mat.	1.96601e-05
Perovskite_additives_compounds_Terephthalic acid	Perovskite	Proc.	1.96426e-05
Perovskite_surface_treatment_before_next_deposition_step_Ar plasma	Perovskite	Proc.	1.96189e-05
Perovskite_deposition_thermal_annealing_temperature_100.0 >> 70.0	Perovskite	Proc.	1.96122e-05
HTL_additives_compounds_Ox-SWCNTs	HTL	Proc.	1.95747e-05
Perovskite_composition_b_ions_coefficients_0.75; 0.25	Perovskite	Mat.	1.94758e-05
HTL_additives_compounds_EDA	HTL	Proc.	1.94719e-05
Perovskite_deposition_solvents_mixing_ratios_2; 7	Perovskite	Proc.	1.94088e-05
Perovskite_additives_concentrations_0.05 M	Perovskite	Proc.	1.9398e-05
Perovskite_additives_concentrations_2.5 mg/ml	Perovskite	Proc.	1.9378e-05
Perovskite_deposition_solvents_mixing_ratios_1 >> 1; 2	Perovskite	Proc.	1.93708e-05
Perovskite_composition_a_ions_coefficients_0.95; 0.05	Perovskite	Mat.	1.93447e-05
Add_lay_front_thickness_list_50.0	Other	Proc.	1.54811e-07
HTL_stack_sequence_CPE-K	HTL	Mat.	1.93084e-05
HTL_stack_sequence_BTT(DPP-Th)3-EH	HTL	Mat.	1.92737e-05
Perovskite_deposition_after_treatment_of_formed_perovskite_Near Infrared radiation	Perovskite	Proc.	1.92423e-05
ETL_additives_concentrations_0.05	ETL	Proc.	1.92326e-05
HTL_stack_sequence_Carbozole @ S14	HTL	Mat.	1.92254e-05
Perovskite_additives_compounds_Cl; Formamide; Guadinium	Perovskite	Proc.	1.92244e-05
HTL_deposition_procedure_Electrodeposition	HTL	Proc.	1.92025e-05
HTL_stack_sequence_asy-PBTBDT	HTL	Mat.	1.91782e-05
Add_lay_front_thickness_list_90.0	Other	Proc.	9.13197e-07
Perovskite_deposition_thermal_annealing_temperature_90; 120 >> 100	Perovskite	Proc.	1.91107e-05
Perovskite_additives_concentrations_0.3 M	Perovskite	Proc.	1.9107e-05
Perovskite_deposition_solvents_mixing_ratios_6; 4 >> 1	Perovskite	Proc.	1.90986e-05
HTL_stack_sequence_BTPA-TCNE	HTL	Mat.	1.90897e-05
Perovskite_deposition_solvents_mixing_ratios_17; 3 >> 1; 99	Perovskite	Proc.	1.90431e-05
Add_lay_front_True	Other	Mat.	0.000162654
Perovskite_additives_concentrations_2.5 mol%; 10 mol%	Perovskite	Proc.	1.90167e-05
Perovskite_additives_concentrations_0.2 wt%	Perovskite	Proc.	1.89613e-05
Perovskite_additives_concentrations_3	Perovskite	Proc.	1.89392e-05
Perovskite_deposition_solvents_mixing_ratios_3; 5	Perovskite	Proc.	1.89151e-05
Perovskite_band_gap_1.481	Perovskite	Proc.	1.88899e-05
Perovskite_deposition_quenching_media_additives_concentrations_8 mg/ml	Perovskite	Proc.	1.88274e-05
ETL_stack_sequence_pBTTz	ETL	Mat.	1.88125e-05
ETL_deposition_solvents_Water	ETL	Proc.	1.88118e-05
Perovskite_band_gap_1.36	Perovskite	Proc.	1.88035e-05
Perovskite_additives_compounds_BmPyPhB	Perovskite	Proc.	1.87878e-05
Perovskite_deposition_quenching_media_additives_compounds_I2	Perovskite	Proc.	1.8745e-05
HTL_additives_compounds_WOx	HTL	Proc.	1.8706e-05
Perovskite_deposition_thermal_annealing_temperature_40; 55; 75; 100	Perovskite	Proc.	1.8677e-05
ETL_stack_sequence_PCBM-60; F8BT	ETL	Mat.	1.86742e-05
Perovskite_deposition_thermal_annealing_temperature_90.0 >> 150.0	Perovskite	Proc.	1.86686e-05
ETL_stack_sequence_MgO-c	ETL	Mat.	1.86121e-05
Perovskite_additives_concentrations_30 mmolL-1	Perovskite	Proc.	1.86085e-05
Perovskite_additives_compounds_organicD窶壬i窶植	Perovskite	Proc.	1.85254e-05
Perovskite_additives_compounds_Thiosemicarbazide	Perovskite	Proc.	1.85053e-05
Perovskite_band_gap_1.586	Perovskite	Proc.	1.84797e-05
Perovskite_deposition_thermal_annealing_temperature_50; 160	Perovskite	Proc.	1.84785e-05
HTL_stack_sequence_PCA-1	HTL	Mat.	1.84502e-05
Perovskite_composition_a_ions_coefficients_2; 4	Perovskite	Mat.	1.84122e-05
Perovskite_additives_concentrations_0.0003 mmol/ml	Perovskite	Proc.	1.83466e-05
Perovskite_deposition_thermal_annealing_time_2.0; 5.0	Perovskite	Proc.	1.82594e-05
HTL_additives_compounds_AgNO3	HTL	Proc.	1.81805e-05
Perovskite_deposition_thermal_annealing_temperature_100; 120	Perovskite	Proc.	1.81386e-05
Perovskite_additives_compounds_Cl; NH4Cl	Perovskite	Proc.	1.81351e-05
HTL_stack_sequence_HS-Ph-CN	HTL	Mat.	1.81168e-05
Perovskite_deposition_quenching_media_additives_compounds_HI	Perovskite	Proc.	1.81046e-05
HTL_stack_sequence_PEDOT:PSS; PEG	HTL	Mat.	1.80545e-05
ETL_additives_compounds_ Cu	ETL	Proc.	1.80471e-05
Perovskite_additives_concentrations_0.13	Perovskite	Proc.	1.80082e-05
Perovskite_band_gap_1.594	Perovskite	Proc.	1.79892e-05
ETL_stack_sequence_ZnO@rQD-np	ETL	Mat.	1.79774e-05
Perovskite_deposition_procedure_Drop-infiltration	Perovskite	Proc.	1.79656e-05
Perovskite_additives_compounds_Citric acid; Cl	Perovskite	Proc.	1.7931e-05
Perovskite_deposition_aggregation_state_of_reactants_Liquid >> Gas >> Liquid	Perovskite	Proc.	1.78842e-05
Perovskite_deposition_thermal_annealing_temperature_Unknown >> 50; 100	Perovskite	Proc.	1.78616e-05
avg_1st_ionization_potential_(kJ/mol)	Perovskite	Mat.	-0.000730007
Perovskite_additives_compounds_2-(1H-pyrazol-1-yl)pyridine	Perovskite	Proc.	1.78098e-05
HTL_stack_sequence_PMMA	HTL	Mat.	1.77938e-05
ETL_stack_sequence_MoO3	ETL	Mat.	1.77909e-05
HTL_stack_sequence_NiO	HTL	Mat.	1.77312e-05
ETL_additives_compounds_Carbon-QDs	ETL	Proc.	1.7728e-05
Perovskite_additives_compounds_PVDF-HFP	Perovskite	Proc.	1.76664e-05
ETL_stack_sequence_Choline chloride	ETL	Mat.	1.76073e-05
Perovskite_deposition_thermal_annealing_temperature_60.0; 80.0	Perovskite	Proc.	1.7518e-05
Perovskite_additives_concentrations_nan; 4 mg/ml	Perovskite	Proc.	1.7488e-05
Perovskite_additives_compounds_Carbon-np; Urea	Perovskite	Proc.	1.74627e-05
Perovskite_deposition_thermal_annealing_time_10.0; 50.0	Perovskite	Proc.	1.74081e-05
Perovskite_deposition_thermal_annealing_time_10.0 >> 10.0; 15.0	Perovskite	Proc.	1.7386e-05
ETL_additives_compounds_rGraphene oxide	ETL	Proc.	1.73773e-05
Perovskite_deposition_synthesis_atmosphere_Chlorobenzene; N2	Perovskite	Proc.	1.73472e-05
ETL_stack_sequence_ ZrO2-mp	ETL	Mat.	1.73266e-05
Perovskite_deposition_thermal_annealing_time_1.0; 1.0	Perovskite	Proc.	1.72971e-05
ETL_additives_compounds_ Au@Ag-np; Li-TFSI	ETL	Proc.	1.7273e-05
Perovskite_additives_compounds_SWCNTs	Perovskite	Proc.	1.72136e-05
ETL_stack_sequence_ ZnO-c	ETL	Mat.	1.72093e-05
HTL_additives_compounds_Glucose; Graphene oxide	HTL	Proc.	1.7194e-05
HTL_additives_compounds_NiOx	HTL	Proc.	1.71636e-05
HTL_stack_sequence_CsSnBr2I-QDs	HTL	Mat.	1.71563e-05
Perovskite_deposition_thermal_annealing_temperature_70.0 >> 130.0	Perovskite	Proc.	1.71091e-05
ETL_stack_sequence_TiO2-np	ETL	Mat.	1.71079e-05
ETL_stack_sequence_ CdSO	ETL	Mat.	1.7085e-05
Perovskite_deposition_thermal_annealing_temperature_100; 160	Perovskite	Proc.	1.70664e-05
Perovskite_additives_concentrations_0.03 wt%	Perovskite	Proc.	1.70661e-05
HTL_stack_sequence_FBA3	HTL	Mat.	1.70623e-05
HTL_stack_sequence_PolyTDP	HTL	Mat.	1.70538e-05
Perovskite_deposition_thermal_annealing_time_10.0; 10.0; 10.0; 10.0; 10.0; 50.0	Perovskite	Proc.	1.70234e-05
ETL_additives_compounds_Nb	ETL	Proc.	1.69758e-05
Perovskite_deposition_thermal_annealing_temperature_50; 100 >> 50; 100	Perovskite	Proc.	1.69529e-05
Perovskite_deposition_quenching_media_volume_150.0	Perovskite	Proc.	1.69514e-05
ETL_stack_sequence_ TiO2-mp; YVO4:Eu:Bi-np	ETL	Mat.	1.69509e-05
HTL_deposition_procedure_ E-beam evaporation	HTL	Proc.	1.69461e-05
Substrate_stack_sequence_ Graphene; TETA	Substrate	Mat.	1.69457e-05
HTL_stack_sequence_ Graphene oxide	HTL	Mat.	1.68968e-05
Perovskite_composition_none_stoichiometry_components_in_excess_Cl	Perovskite	Mat.	1.68747e-05
Perovskite_deposition_solvents_mixing_ratios_2; 2	Perovskite	Proc.	1.68516e-05
Perovskite_additives_compounds_Phosphonic acid; Aluminium acetylacetonate	Perovskite	Proc.	1.68506e-05
Perovskite_additives_compounds_Cl; MDACl2	Perovskite	Proc.	1.68211e-05
Perovskite_additives_compounds_Isatin-Cl	Perovskite	Proc.	1.67892e-05
Perovskite_deposition_quenching_media_Acetone	Perovskite	Proc.	1.6766e-05
HTL_stack_sequence_Graphene oxide	HTL	Mat.	1.67401e-05
Perovskite_storage_relative_humidity_20.0	Perovskite	Proc.	1.67e-05
ETL_stack_sequence_NDIF1	ETL	Mat.	1.66411e-05
HTL_stack_sequence_poly(DTSTPD-r-BThTPD)	HTL	Mat.	1.66312e-05
Perovskite_additives_compounds_NbF5	Perovskite	Proc.	1.65061e-05
ETL_stack_sequence_PCBM-60; ICBA	ETL	Mat.	1.64949e-05
Perovskite_additives_compounds_Poly(amicacid)	Perovskite	Proc.	1.64886e-05
Perovskite_additives_concentrations_1.5	Perovskite	Proc.	1.64678e-05
Perovskite_deposition_synthesis_atmosphere_Air >> Air; MAI	Perovskite	Proc.	1.64494e-05
HTL_stack_sequence_p-DTS(FBTTh2)2	HTL	Mat.	1.64437e-05
HTL_stack_sequence_PhCz-4MeOTPA	HTL	Mat.	1.64079e-05
Perovskite_deposition_procedure_ Dripping	Perovskite	Proc.	1.64066e-05
Perovskite_composition_a_ions_coefficients_0.05; 0.8075; 0.1425	Perovskite	Mat.	1.63556e-05
ETL_additives_compounds_CoSe	ETL	Proc.	1.63177e-05
ETL_stack_sequence_ PDI-Br	ETL	Mat.	1.62996e-05
Perovskite_additives_compounds_Phenylethylammonium iodide	Perovskite	Proc.	1.62965e-05
Perovskite_deposition_reaction_solutions_compounds_nan >> Octylammonium iodide	Perovskite	Proc.	1.62952e-05
Perovskite_deposition_quenching_media_Diethyl ether; Methanol	Perovskite	Proc.	1.62863e-05
HTL_additives_compounds_Co-TFSI	HTL	Proc.	1.62567e-05
Perovskite_deposition_quenching_media_mixing_ratios_1; 1	Perovskite	Proc.	1.62407e-05
ETL_additives_compounds_K	ETL	Proc.	1.62332e-05
avg_Allred-Rockow_electronegativity	Perovskite	Mat.	-0.00153622
HTL_additives_compounds_TiO2@MoO3-np	HTL	Proc.	1.61732e-05
Perovskite_additives_compounds_Li-TFSI	Perovskite	Proc.	1.61317e-05
Perovskite_deposition_solvents_DMSO; NMP	Perovskite	Proc.	1.61172e-05
Perovskite_deposition_solvents_mixing_ratios_85; 15	Perovskite	Proc.	1.61e-05
HTL_stack_sequence_Triazine	HTL	Mat.	1.60691e-05
ETL_additives_concentrations_1 mol%	ETL	Proc.	1.60675e-05
Perovskite_deposition_synthesis_atmosphere_Methylamin; N2 >> Methylamin; N2	Perovskite	Proc.	1.60513e-05
HTL_additives_compounds_JQ3; Li-TFSI; TBP	HTL	Proc.	1.60051e-05
Perovskite_deposition_synthesis_atmosphere_relative_humidity_28	Perovskite	Proc.	1.60009e-05
Perovskite_additives_compounds_Pb(Ac)2	Perovskite	Proc.	1.59681e-05
ETL_additives_compounds_Cs2CO3	ETL	Proc.	1.59568e-05
HTL_additives_compounds_Fe	HTL	Proc.	1.59376e-05
ETL_stack_sequence_PCBM-derivative11	ETL	Mat.	1.59362e-05
avg_Atomic_Number	Perovskite	Mat.	-0.000223441
ETL_additives_compounds_Y2O3	ETL	Proc.	1.58265e-05
avg_Atomic_Radius	Perovskite	Mat.	0.00018554
Perovskite_additives_compounds_In2-4	Perovskite	Proc.	1.57877e-05
Perovskite_deposition_thermal_annealing_time_Unknown >> 4.0	Perovskite	Proc.	1.57139e-05
HTL_stack_sequence_OMe-TATPyr	HTL	Mat.	1.5704e-05
Perovskite_deposition_thermal_annealing_temperature_130.0 >> 120.0	Perovskite	Proc.	1.56972e-05
Perovskite_additives_compounds_Au@TiO2 NPs	Perovskite	Proc.	1.56373e-05
Perovskite_deposition_quenching_media_Ether	Perovskite	Proc.	1.55903e-05
Perovskite_deposition_thermal_annealing_time_1.0; 80.0	Perovskite	Proc.	1.55805e-05
ETL_stack_sequence_ Al2O3-mp; Ag@TiO2-np	ETL	Mat.	1.5558e-05
Perovskite_deposition_quenching_media_Chlorobenzene; Toluene	Perovskite	Proc.	1.5558e-05
Backcontact_deposition_thermal_annealing_time_30.0	Back contact	Proc.	1.55503e-05
Perovskite_deposition_after_treatment_of_formed_perovskite_IR laser radiation	Perovskite	Proc.	1.554e-05
Perovskite_additives_compounds_P(VDF-TrFE)	Perovskite	Proc.	1.55379e-05
Perovskite_additives_concentrations_0.006	Perovskite	Proc.	1.55247e-05
Perovskite_additives_compounds_BHT	Perovskite	Proc.	1.54917e-05
ETL_additives_compounds_ Zn	ETL	Proc.	1.54722e-05
ETL_additives_concentrations_ 3 %	ETL	Proc.	1.54393e-05
HTL_deposition_solvents_Ethyl acetate	HTL	Proc.	1.54005e-05
Perovskite_additives_compounds_RbI	Perovskite	Proc.	1.53841e-05
Perovskite_additives_compounds_Caprolactam	Perovskite	Proc.	1.53549e-05
Perovskite_deposition_solvents_mixing_ratios_15; 1	Perovskite	Proc.	1.53385e-05
Perovskite_composition_a_ions_coefficients_1; 1; 3	Perovskite	Mat.	1.53352e-05
ETL_additives_compounds_CeOx; TiCl4	ETL	Proc.	1.52967e-05
Perovskite_additives_concentrations_1.4 vol%; nan	Perovskite	Proc.	1.52953e-05
Perovskite_additives_concentrations_0.016	Perovskite	Proc.	1.52729e-05
Perovskite_additives_compounds_Ethyl cellulose	Perovskite	Proc.	1.52386e-05
Perovskite_composition_a_ions_coefficients_0.05; 0.95	Perovskite	Mat.	1.52043e-05
ETL_stack_sequence_ NPC60 OH	ETL	Mat.	1.5167e-05
Perovskite_additives_compounds_ NH4Cl	Perovskite	Proc.	1.51337e-05
ETL_stack_sequence_ITCP-M	ETL	Mat.	1.51228e-05
HTL_stack_sequence_pTPA-DBTP	HTL	Mat.	1.51192e-05
Perovskite_deposition_solvents_mixing_ratios_8; 9	Perovskite	Proc.	1.5118e-05
Perovskite_deposition_after_treatment_of_formed_perovskite_met_80W/cm 20.1mm/s	Perovskite	Proc.	1.50959e-05
HTL_stack_sequence_BChl-2	HTL	Mat.	1.50823e-05
ETL_stack_sequence_TiO2-macroporous	ETL	Mat.	1.50813e-05
Perovskite_additives_compounds_NH4H2PO2	Perovskite	Proc.	1.5079e-05
ETL_deposition_aggregation_state_of_reactants_ Gas	ETL	Proc.	1.50787e-05
ETL_stack_sequence_1-ethyl-3-methylimidazolium iodide	ETL	Mat.	1.50637e-05
Perovskite_deposition_solvents_mixing_ratios_6.5; 1	Perovskite	Proc.	1.50144e-05
HTL_stack_sequence_ SDBS	HTL	Mat.	1.49852e-05
HTL_stack_sequence_MFGO	HTL	Mat.	1.49802e-05
Perovskite_deposition_thermal_annealing_time_30.0	Perovskite	Proc.	1.49618e-05
Perovskite_deposition_solvent_annealing_time_60.0	Perovskite	Proc.	1.49465e-05
Perovskite_additives_concentrations_2.5 wt%; 0.2 wt%	Perovskite	Proc.	1.4935e-05
Perovskite_additives_concentrations_4 mol%	Perovskite	Proc.	1.49246e-05
Perovskite_deposition_quenching_media_Chlorobenzene; Diiodooctane	Perovskite	Proc.	1.49188e-05
ETL_stack_sequence_ITCPTC	ETL	Mat.	1.48574e-05
ETL_stack_sequence_Carbon-QDs; TiO2-c	ETL	Mat.	1.48095e-05
HTL_additives_concentrations_0.01 %; nan	HTL	Proc.	1.47981e-05
Perovskite_deposition_thermal_annealing_temperature_60; 70 >> 70; 115	Perovskite	Proc.	1.46806e-05
Perovskite_additives_compounds_PbCl2; TBP	Perovskite	Proc.	1.46499e-05
HTL_additives_compounds_Carbon-nt; Li-TFSI; TBP	HTL	Proc.	1.46437e-05
ETL_additives_compounds_bis-C60	ETL	Proc.	1.46363e-05
avg_Atomic_Weight	Perovskite	Mat.	3.86425e-05
Perovskite_additives_compounds_TiO2-nw	Perovskite	Proc.	1.46097e-05
Perovskite_additives_compounds_Octylammonium	Perovskite	Proc.	1.45786e-05
Perovskite_deposition_thermal_annealing_time_0.25; 60.0	Perovskite	Proc.	1.45001e-05
Perovskite_deposition_thermal_annealing_time_Unknown >> 1.0	Perovskite	Proc.	1.44836e-05
ETL_stack_sequence_CPTA	ETL	Mat.	1.44708e-05
Perovskite_deposition_solvents_mixing_ratios_3; 4; 3	Perovskite	Proc.	1.44687e-05
Perovskite_additives_compounds_SbCl3	Perovskite	Proc.	1.44685e-05
HTL_deposition_synthesis_atmosphere_N2 >> methanol	HTL	Proc.	1.44612e-05
Perovskite_additives_concentrations_0.004	Perovskite	Proc.	1.44506e-05
Perovskite_deposition_thermal_annealing_temperature_180	Perovskite	Proc.	1.44503e-05
ETL_deposition_procedure_ Electrospraying	ETL	Proc.	1.44317e-05
Perovskite_deposition_thermal_annealing_time_10.0; 5.0	Perovskite	Proc.	1.44236e-05
Perovskite_deposition_solvents_mixing_ratios_3; 7 >> 3; 7	Perovskite	Proc.	1.44209e-05
Perovskite_additives_compounds_Cl; Cu:NiO-np; Graphite	Perovskite	Proc.	1.44207e-05
HTL_additives_concentrations_0.1 wt%	HTL	Proc.	1.44178e-05
Perovskite_deposition_quenching_media_additives_compounds_IEICO-4F	Perovskite	Proc.	1.43624e-05
Perovskite_deposition_reaction_solutions_concentrations_0.15 M; 0.75 M; 0.1 M; 1 M	Perovskite	Proc.	1.43345e-05
Perovskite_band_gap_1.39	Perovskite	Proc.	1.43321e-05
ETL_stack_sequence_ Au-np; TiO2-mp	ETL	Mat.	1.43061e-05
HTL_stack_sequence_Tetrakis-Triphenylamine	HTL	Mat.	1.42691e-05
HTL_stack_sequence_TPA-TPM	HTL	Mat.	1.42521e-05
Perovskite_composition_b_ions_coefficients_0.99; 0.01	Perovskite	Mat.	1.42348e-05
HTL_stack_sequence_MeO-PPV	HTL	Mat.	1.42247e-05
ETL_stack_sequence_ ZIF-8-20	ETL	Mat.	1.42079e-05
Perovskite_additives_compounds_Yttrium	Perovskite	Proc.	1.42038e-05
Perovskite_additives_compounds_A10C60	Perovskite	Proc.	1.41999e-05
Perovskite_pl_max_650.0	Perovskite	Proc.	1.41856e-05
HTL_stack_sequence_ NiO-nw	HTL	Mat.	1.41752e-05
HTL_stack_sequence_oxo-Graphene	HTL	Mat.	1.41623e-05
HTL_stack_sequence_PDBT-co-TT	HTL	Mat.	1.41553e-05
Perovskite_deposition_thermal_annealing_temperature_90.0 >> 115.0	Perovskite	Proc.	1.41436e-05
Backcontact_stack_sequence_Carbon; LPP	Back contact	Mat.	1.41399e-05
HTL_stack_sequence_Z1	HTL	Mat.	1.41016e-05
Perovskite_deposition_quenching_media_additives_compounds_IDIC-Th	Perovskite	Proc.	1.40739e-05
Perovskite_additives_concentrations_2 %; 0.1 %	Perovskite	Proc.	1.40245e-05
Perovskite_additives_compounds_CH2CHCH2 (CC2)-ionic liquid	Perovskite	Proc.	1.39487e-05
Perovskite_additives_concentrations_0.24 mg/ml; nan	Perovskite	Proc.	1.39486e-05
Perovskite_composition_a_ions_coefficients_0.2; 0.2; 0.6	Perovskite	Mat.	1.3947e-05
ETL_stack_sequence_Mg0.1Zn0.9O-np	ETL	Mat.	1.39391e-05
HTL_stack_sequence_TP-FTzF-TP	HTL	Mat.	1.39023e-05
HTL_deposition_procedure_E-beam evaporation	HTL	Proc.	1.38955e-05
Perovskite_additives_compounds_BrPh-Thr; bis-PCBM	Perovskite	Proc.	1.38575e-05
Perovskite_deposition_solvents_mixing_ratios_5; 5	Perovskite	Proc.	1.38243e-05
Perovskite_deposition_thermal_annealing_time_Unknown >> 5.0; 5.0; 5.0	Perovskite	Proc.	1.38109e-05
Perovskite_pl_max_752.0	Perovskite	Proc.	1.37782e-05
ETL_deposition_thermal_annealing_temperature_ 90	ETL	Proc.	1.37733e-05
Perovskite_deposition_quenching_media_additives_concentrations_0.03	Perovskite	Proc.	1.37584e-05
avg_Boiling_Point_(K)	Perovskite	Mat.	-0.00136529
avg_Cohesive_energy	Perovskite	Mat.	0.0015782
HTL_additives_concentrations_ 2 vol%	HTL	Proc.	1.3722e-05
Perovskite_additives_concentrations_0.067 mol%	Perovskite	Proc.	1.36965e-05
Perovskite_deposition_quenching_media_additives_compounds_PFA	Perovskite	Proc.	1.36745e-05
Perovskite_composition_b_ions_coefficients_0.97; 0.03	Perovskite	Mat.	1.36244e-05
Perovskite_additives_compounds_PMMA; Rb	Perovskite	Proc.	1.36009e-05
ETL_stack_sequence_ C60-BCT-Au-NP	ETL	Mat.	1.35997e-05
Perovskite_additives_compounds_MA3Bi2Br9	Perovskite	Proc.	1.35769e-05
HTL_additives_compounds_CuPc; Li-TFSI; TBP	HTL	Proc.	1.35129e-05
ETL_additives_compounds_Nb; TiCl4	ETL	Proc.	1.35028e-05
HTL_additives_compounds_FK209; Li-TFIS; TBP	HTL	Proc.	1.3434e-05
Perovskite_additives_compounds_DPPS	Perovskite	Proc.	1.34238e-05
ETL_deposition_procedure_ Unknown	ETL	Proc.	1.3421e-05
Perovskite_deposition_solvents_DMSO; GBL @ 3; 7 >> DMSO; GBL @ 3; 7	Perovskite	Proc.	1.34048e-05
Backcontact_stack_sequence_ CSCNT@SnO2	Back contact	Mat.	1.33941e-05
Perovskite_deposition_quenching_media_mixing_ratios_97; 3	Perovskite	Proc.	1.33611e-05
ETL_stack_sequence_PCBM-60; PS-b-PEO	ETL	Mat.	1.33231e-05
ETL_deposition_substrate_temperature_ 90	ETL	Proc.	1.33185e-05
Perovskite_additives_concentrations_2.8 vol%; nan	Perovskite	Proc.	1.3303e-05
ETL_stack_sequence_PT-PDI	ETL	Mat.	1.32537e-05
Perovskite_additives_compounds_EDACl2	Perovskite	Proc.	1.32464e-05
Perovskite_additives_compounds_Cl; DL-tartaricacid	Perovskite	Proc.	1.32441e-05
Perovskite_deposition_quenching_media_Antisolvent	Perovskite	Proc.	1.32375e-05
Perovskite_additives_concentrations_29 wt%	Perovskite	Proc.	1.32328e-05
Perovskite_deposition_synthesis_atmosphere_N2	Perovskite	Proc.	1.3229e-05
Perovskite_composition_short_form_MAPbSnBrI	Perovskite	Mat.	1.32224e-05
Perovskite_deposition_procedure_Spin-coating >> Evaporation >> CBD	Perovskite	Proc.	1.32187e-05
Perovskite_additives_concentrations_3 mol%	Perovskite	Proc.	1.3201e-05
Perovskite_deposition_thermal_annealing_temperature_90; 25 >> 25 >> 120	Perovskite	Proc.	1.31998e-05
ETL_additives_compounds_SWCNTs	ETL	Proc.	1.31895e-05
Perovskite_additives_concentrations_ 0.1 mol%	Perovskite	Proc.	1.31564e-05
Perovskite_band_gap_1.565	Perovskite	Proc.	1.31409e-05
Perovskite_deposition_thermal_annealing_temperature_Unknown >> 60; 80; 100	Perovskite	Proc.	1.3109e-05
Perovskite_additives_compounds_PS; PMMA	Perovskite	Proc.	1.30982e-05
avg_Covalent_Radius	Perovskite	Mat.	-9.8507e-05
HTL_stack_sequence_XPP	HTL	Mat.	1.30712e-05
HTL_additives_concentrations_3 %; nan	HTL	Proc.	1.30626e-05
Perovskite_additives_concentrations_1.8 mg/ml	Perovskite	Proc.	1.30598e-05
Perovskite_additives_compounds_Ag-rGO; Cl	Perovskite	Proc.	1.30006e-05
Perovskite_deposition_thermal_annealing_time_10.0; 20.0; 5.0; 30.0	Perovskite	Proc.	1.29649e-05
HTL_additives_compounds_Ni	HTL	Proc.	1.29523e-05
Perovskite_deposition_quenching_media_n-Butyl alcohol	Perovskite	Proc.	1.29453e-05
ETL_stack_sequence_ Rodhamine 101	ETL	Mat.	1.29288e-05
Perovskite_deposition_solvents_Dimethylacetamide; DMF	Perovskite	Proc.	1.29092e-05
Perovskite_additives_concentrations_0.764 M	Perovskite	Proc.	1.28825e-05
Perovskite_deposition_thermal_annealing_time_Unknown >> 600.0	Perovskite	Proc.	1.28707e-05
HTL_additives_compounds_F6-TCNNQ	HTL	Proc.	1.27884e-05
Perovskite_additives_compounds_HMTA	Perovskite	Proc.	1.27581e-05
Perovskite_additives_compounds_Cl; ICBA	Perovskite	Proc.	1.27345e-05
Perovskite_deposition_thermal_annealing_temperature_25; 90	Perovskite	Proc.	1.26997e-05
Perovskite_additives_concentrations_6 mol%; 10 mol%	Perovskite	Proc.	1.26763e-05
Perovskite_deposition_thermal_annealing_time_0.25; 5.0	Perovskite	Proc.	1.26117e-05
avg_crystal_radius	Perovskite	Mat.	-0.00063838
Perovskite_deposition_thermal_annealing_temperature_160; 100	Perovskite	Proc.	1.26056e-05
Perovskite_additives_concentrations_0.1 mg/ml	Perovskite	Proc.	1.26049e-05
Perovskite_deposition_thermal_annealing_temperature_320.0	Perovskite	Proc.	1.25944e-05
Perovskite_additives_concentrations_0.0075	Perovskite	Proc.	1.25598e-05
Perovskite_composition_none_stoichiometry_components_in_excess_SnI2	Perovskite	Mat.	1.25322e-05
ETL_deposition_solvents_mixing_ratios_0.01; 1; 0.15; 1	ETL	Proc.	1.2517e-05
Perovskite_deposition_synthesis_atmosphere_Ambient	Perovskite	Proc.	1.25e-05
HTL_stack_sequence_ V2O5	HTL	Mat.	1.24917e-05
Perovskite_additives_compounds_DPP-DTT	Perovskite	Proc.	1.24815e-05
Perovskite_additives_compounds_F-PEAI	Perovskite	Proc.	1.24656e-05
HTL_additives_compounds_LAD	HTL	Proc.	1.24495e-05
ETL_additives_compounds_PFNOX	ETL	Proc.	1.24424e-05
ETL_stack_sequence_PEAI	ETL	Mat.	1.24364e-05
Perovskite_additives_compounds_Ag@SiO2	Perovskite	Proc.	1.23749e-05
Perovskite_composition_short_form_CsSnI	Perovskite	Mat.	1.234e-05
Perovskite_deposition_thermal_annealing_time_5.0 >> Unknown >> Unknown	Perovskite	Proc.	1.233e-05
Perovskite_additives_concentrations_0.8 M	Perovskite	Proc.	1.23151e-05
Perovskite_deposition_synthesis_atmosphere_Dry air >> Dry air; Methylamin	Perovskite	Proc.	1.23145e-05
Backcontact_stack_sequence_Mg	Back contact	Mat.	1.2294e-05
Perovskite_additives_compounds_Cl; Liquid crystals	Perovskite	Proc.	1.22788e-05
ETL_deposition_aggregation_state_of_reactants_Gas	ETL	Proc.	1.22771e-05
HTL_stack_sequence_Ome-TPA-CuPc	HTL	Mat.	1.22478e-05
Perovskite_additives_concentrations_100 vol%	Perovskite	Proc.	1.22407e-05
Perovskite_additives_compounds_F4-TCNQ	Perovskite	Proc.	1.22396e-05
HTL_stack_sequence_C202	HTL	Mat.	1.22362e-05
Perovskite_deposition_solvents_DMF; DMSO; H2O	Perovskite	Proc.	1.22251e-05
HTL_stack_sequence_Azomethine	HTL	Mat.	1.22074e-05
Perovskite_additives_compounds_Formamide	Perovskite	Proc.	1.22063e-05
Perovskite_additives_compounds_EDA	Perovskite	Proc.	1.22041e-05
Perovskite_deposition_thermal_annealing_time_120.0 >> 1.0 >> 1.0 >> 15.0	Perovskite	Proc.	1.21732e-05
ETL_additives_compounds_NH4F	ETL	Proc.	1.21693e-05
HTL_stack_sequence_HB-Cz	HTL	Mat.	1.21347e-05
Perovskite_deposition_after_treatment_of_formed_perovskite_Radiative thermal annealing	Perovskite	Proc.	1.20945e-05
HTL_additives_compounds_2-Py	HTL	Proc.	1.20906e-05
Perovskite_band_gap_1.64	Perovskite	Proc.	1.20772e-05
Perovskite_pl_max_530.0	Perovskite	Proc.	1.20715e-05
Perovskite_deposition_thermal_annealing_time_10.0 >> 3.0	Perovskite	Proc.	1.20634e-05
Perovskite_additives_concentrations_0.005 vol%	Perovskite	Proc.	1.20584e-05
Perovskite_additives_compounds_Hexylamine hydrochlorid	Perovskite	Proc.	1.20326e-05
ETL_stack_sequence_2-acetylpyridine	ETL	Mat.	1.20273e-05
Perovskite_deposition_solvent_annealing_time_30.0	Perovskite	Proc.	1.20266e-05
ETL_stack_sequence_ TiO2-nanoflowers	ETL	Mat.	1.20004e-05
Perovskite_additives_compounds_PCBM-nw	Perovskite	Proc.	1.19796e-05
Perovskite_additives_compounds_AsI3	Perovskite	Proc.	1.19732e-05
HTL_stack_sequence_CA-Br; TPA-PT-C6	HTL	Mat.	1.19636e-05
Perovskite_deposition_solvents_mixing_ratios_3; 1; 1	Perovskite	Proc.	1.19551e-05
Perovskite_deposition_thermal_annealing_time_10.0; 10.0; 10.0; 10.0; 10.0; 10.0	Perovskite	Proc.	1.19506e-05
HTL_additives_compounds_CNT	HTL	Proc.	1.1947e-05
HTL_additives_compounds_Cu; Li	HTL	Proc.	1.19303e-05
ETL_stack_sequence_ Phen-NaDPO	ETL	Mat.	1.19242e-05
Perovskite_composition_a_ions_(PEA); MA	Perovskite	Mat.	1.19196e-05
HTL_stack_sequence_ CuBuPc	HTL	Mat.	1.19185e-05
Perovskite_deposition_after_treatment_of_formed_perovskite_met_Colling rate < GHT-4	Perovskite	Proc.	1.1911e-05
Perovskite_pl_max_645.0	Perovskite	Proc.	1.18964e-05
Perovskite_additives_concentrations_10 wt%	Perovskite	Proc.	1.18881e-05
ETL_additives_compounds_Ru	ETL	Proc.	1.18785e-05
Perovskite_deposition_thermal_annealing_temperature_55	Perovskite	Proc.	1.18649e-05
avg_Density_(g/mL)	Perovskite	Mat.	-0.000113946
Perovskite_deposition_quenching_media_additives_compounds_PCBM-60; TIPD	Perovskite	Proc.	1.18526e-05
HTL_stack_sequence_Benzylamine	HTL	Mat.	1.18525e-05
ETL_deposition_reaction_solutions_concentrations_3 mol%; 10 vol%	ETL	Proc.	1.18212e-05
HTL_additives_compounds_FK269; Li-TFSI; nan; TBP	HTL	Proc.	1.18197e-05
Perovskite_deposition_synthesis_atmosphere_relative_humidity_10.0	Perovskite	Proc.	1.17681e-05
Perovskite_deposition_solvents_mixing_ratios_17; 3	Perovskite	Proc.	1.17673e-05
Perovskite_composition_a_ions_coefficients_0.1; 0.7; 0.2	Perovskite	Mat.	1.17158e-05
Perovskite_composition_c_ions_coefficients_0.03; 2.97	Perovskite	Mat.	1.17103e-05
Perovskite_deposition_solvents_DMSO; GBL; IPA	Perovskite	Proc.	1.17032e-05
Perovskite_additives_compounds_BMImI; LiI; L-iTFSI	Perovskite	Proc.	1.16917e-05
Perovskite_additives_concentrations_0.005 wt%	Perovskite	Proc.	1.16784e-05
Perovskite_deposition_thermal_annealing_temperature_100.0 >> 100	Perovskite	Proc.	1.16495e-05
avg_families	Perovskite	Mat.	0.000391165
Perovskite_additives_concentrations_0.1 w%	Perovskite	Proc.	1.16448e-05
HTL_surface_treatment_before_next_deposition_step_Ar plasma	HTL	Proc.	1.16413e-05
Perovskite_additives_compounds_Methylpyrrolidone	Perovskite	Proc.	1.16274e-05
Perovskite_pl_max_724.0	Perovskite	Proc.	1.16197e-05
HTL_additives_compounds_MoO3-np	HTL	Proc.	1.1574e-05
ETL_additives_compounds_Yttrium	ETL	Proc.	1.15694e-05
HTL_stack_sequence_WO3-nw@PEDOT	HTL	Mat.	1.15568e-05
Perovskite_composition_c_ions_coefficients_ 4	Perovskite	Mat.	1.15342e-05
Perovskite_additives_compounds_EC	Perovskite	Proc.	1.14922e-05
Perovskite_deposition_thermal_annealing_time_600.0 >> 5.0	Perovskite	Proc.	1.14849e-05
Perovskite_band_gap_1.598	Perovskite	Proc.	1.14736e-05
HTL_deposition_solvents_supplier_Unknown	HTL	Proc.	1.14317e-05
Perovskite_pl_max_817.0	Perovskite	Proc.	1.14195e-05
Substrate_area_6.25	Substrate	Proc.	1.13958e-05
Perovskite_additives_compounds_BaCl2; Cl	Perovskite	Proc.	1.13892e-05
Perovskite_storage_relative_humidity_10.0	Perovskite	Proc.	1.13881e-05
avg_gilmor_number_of_valence_electron	Perovskite	Mat.	0.000153306
Perovskite_deposition_quenching_media_Ethyl ether; Hexane	Perovskite	Proc.	1.13797e-05
Perovskite_additives_compounds_NiI2	Perovskite	Proc.	1.13654e-05
Perovskite_deposition_solvents_DMF >> DMF	Perovskite	Proc.	1.13516e-05
ETL_stack_sequence_ Carbon-QDs	ETL	Mat.	1.13401e-05
avg_Gordy_electonegativity	Perovskite	Mat.	-0.000339724
Perovskite_additives_compounds_FEAI	Perovskite	Proc.	1.12751e-05
Perovskite_additives_concentrations_nan	Perovskite	Proc.	1.12549e-05
Perovskite_deposition_thermal_annealing_time_0.3; 50.0	Perovskite	Proc.	1.11976e-05
Substrate_cleaning_procedure_Soap >> Water >> Ultrasonic bath >> Acetone >> Ultrasonic bath >> IPA >> O2-plasma	Substrate	Proc.	1.11844e-05
HTL_stack_sequence_TTE-2	HTL	Mat.	1.11797e-05
Perovskite_additives_concentrations_12 mg/ml; 12 mg/ml	Perovskite	Proc.	1.11724e-05
Perovskite_deposition_thermal_annealing_temperature_130.0 >> Unknown >> 100.0	Perovskite	Proc.	1.11703e-05
Perovskite_deposition_quenching_media_additives_compounds_NPB	Perovskite	Proc.	1.11692e-05
ETL_deposition_procedure_Spin-coating >> CBD	ETL	Proc.	1.11689e-05
HTL_deposition_reaction_solutions_concentrations_ 0.05 mg/ml	HTL	Proc.	1.11553e-05
Perovskite_deposition_solvents_mixing_ratios_1 >> 5; 95	Perovskite	Proc.	1.11449e-05
ETL_additives_compounds_Fe	ETL	Proc.	1.11038e-05
HTL_deposition_thermal_annealing_temperature_150	HTL	Proc.	1.11037e-05
avg_group	Perovskite	Mat.	0.000301884
Perovskite_deposition_thermal_annealing_time_30.0 >> 40.0	Perovskite	Proc.	1.10745e-05
Perovskite_composition_short_form_(PDA)MAPbI	Perovskite	Mat.	1.1073e-05
ETL_additives_compounds_ Au-np; TiCl4	ETL	Proc.	1.1067e-05
HTL_stack_sequence_M109	HTL	Mat.	1.10322e-05
Perovskite_deposition_quenching_media_additives_compounds_PBTI	Perovskite	Proc.	1.10299e-05
ETL_deposition_solvents_1-butanol	ETL	Proc.	1.10215e-05
Perovskite_deposition_solvents_Dimetyletanamid	Perovskite	Proc.	1.10138e-05
Perovskite_additives_compounds_Formic acid	Perovskite	Proc.	1.10016e-05
Perovskite_deposition_solvents_GBL; DMSO	Perovskite	Proc.	1.09999e-05
Perovskite_deposition_thermal_annealing_time_7.0; 1.0 >> 10.0	Perovskite	Proc.	1.09502e-05
Perovskite_additives_compounds_Pb(DDTC)2	Perovskite	Proc.	1.09463e-05
Perovskite_deposition_solvents_mixing_ratios_nan >> 2; 98	Perovskite	Proc.	1.09456e-05
Perovskite_additives_compounds_t-BAI	Perovskite	Proc.	1.0942e-05
HTL_stack_sequence_TPL	HTL	Mat.	1.09418e-05
Perovskite_additives_concentrations_0.8 wt.%	Perovskite	Proc.	1.09395e-05
HTL_additives_compounds_Cu-2Cl; Li-TFSI; TBP	HTL	Proc.	1.09178e-05
ETL_additives_compounds_N-DPBI	ETL	Proc.	1.09158e-05
ETL_additives_concentrations_0.005	ETL	Proc.	1.09153e-05
Perovskite_additives_concentrations_0.02 wt%	Perovskite	Proc.	1.08947e-05
ETL_stack_sequence_ Bphen; Ir(MDQ)2(acac)	ETL	Mat.	1.08921e-05
HTL_additives_compounds_Poly(ethylene glycol) tridecyl ether	HTL	Proc.	1.0892e-05
Perovskite_deposition_solvent_annealing_solvent_atmosphere_DMF; IPA	Perovskite	Proc.	1.08856e-05
ETL_additives_compounds_Li-TFSI	ETL	Proc.	1.08669e-05
Perovskite_deposition_after_treatment_of_formed_perovskite_DABr	Perovskite	Proc.	1.08597e-05
avg_heat_atomization(kJ/mol)	Perovskite	Mat.	0.000626371
HTL_stack_sequence_PCDTBT1	HTL	Mat.	1.08414e-05
Perovskite_deposition_thermal_annealing_time_2.0 >> 390.0	Perovskite	Proc.	1.08335e-05
Perovskite_deposition_solvents_mixing_ratios_97.5; 2.5	Perovskite	Proc.	1.08219e-05
ETL_deposition_reaction_solutions_concentrations_ 20 mg/ml	ETL	Proc.	1.08089e-05
HTL_stack_sequence_X26	HTL	Mat.	1.08005e-05
HTL_additives_compounds_Tb	HTL	Proc.	1.07928e-05
Perovskite_band_gap_2.17	Perovskite	Proc.	1.07838e-05
Perovskite_additives_compounds_Ag	Perovskite	Proc.	1.07745e-05
avg_heat_of_fusion_(kJ/mol)_	Perovskite	Mat.	0.000408082
ETL_additives_compounds_Glucose	ETL	Proc.	1.07682e-05
ETL_deposition_thermal_annealing_temperature_140	ETL	Proc.	1.07613e-05
Perovskite_pl_max_683.0	Perovskite	Proc.	1.076e-05
ETL_stack_sequence_ NiO-mp	ETL	Mat.	1.07414e-05
Perovskite_deposition_thermal_annealing_time_Unknown; Unknown	Perovskite	Proc.	1.07272e-05
Perovskite_deposition_quenching_media_additives_compounds_MABr	Perovskite	Proc.	1.07258e-05
Perovskite_additives_concentrations_0.9 M	Perovskite	Proc.	1.07251e-05
Perovskite_additives_compounds_M13 bacteriophage	Perovskite	Proc.	1.07107e-05
HTL_additives_compounds_4-isopropyl-4窶ｲ-methyldiphenyliodonium tetrakis(pentafluorophenyl)borate	HTL	Proc.	1.07012e-05
HTL_stack_sequence_X55	HTL	Mat.	1.07006e-05
Perovskite_deposition_after_treatment_of_formed_perovskite_met_50 W/cm2; 2.47 s	Perovskite	Proc.	1.06988e-05
ETL_stack_sequence_NDI-TriSe	ETL	Mat.	1.06966e-05
Perovskite_additives_compounds_Cl; Urea	Perovskite	Proc.	1.0696e-05
ETL_deposition_reaction_solutions_compounds_SnO2-np	ETL	Proc.	1.0696e-05
Substrate_stack_sequence_ APTES; Graphene	Substrate	Mat.	1.06801e-05
Perovskite_deposition_thermal_annealing_time_16.0 >> 30.0	Perovskite	Proc.	1.06795e-05
ETL_additives_compounds_ Carbon-np	ETL	Proc.	1.06643e-05
Perovskite_deposition_procedure_Hot-casting	Perovskite	Proc.	1.06156e-05
Perovskite_additives_compounds_MAAc	Perovskite	Proc.	1.05847e-05
ETL_stack_sequence_ Ba(OH)2	ETL	Mat.	1.05592e-05
Perovskite_additives_compounds_IEICO-4F	Perovskite	Proc.	1.05258e-05
ETL_deposition_synthesis_atmosphere_Vacuum	ETL	Proc.	1.05097e-05
ETL_stack_sequence_Al2O3; TiO2-c	ETL	Mat.	1.04927e-05
Perovskite_deposition_solvent_annealing_solvent_atmosphere_H2O	Perovskite	Proc.	1.04831e-05
Perovskite_deposition_thermal_annealing_time_0.33 >> 10.0	Perovskite	Proc.	1.04617e-05
ETL_stack_sequence_PMMA	ETL	Mat.	1.04602e-05
Perovskite_additives_compounds_GdF3	Perovskite	Proc.	1.04589e-05
Backcontact_deposition_substrate_temperature_80	Back contact	Proc.	1.0433e-05
Perovskite_additives_concentrations_0.5; 0.16	Perovskite	Proc.	1.04329e-05
ETL_stack_sequence_AZO-c	ETL	Mat.	1.04215e-05
HTL_stack_sequence_PPyra-TXA	HTL	Mat.	1.03543e-05
Perovskite_deposition_thermal_annealing_time_10.0; 60.0; 90.0	Perovskite	Proc.	1.03264e-05
HTL_stack_sequence_FBA2	HTL	Mat.	1.03097e-05
HTL_stack_sequence_M103	HTL	Mat.	1.02836e-05
Perovskite_deposition_solvents_mixing_ratios_63; 7	Perovskite	Proc.	1.02788e-05
HTL_deposition_procedure_Magnetron sputtering >> Gas reaction	HTL	Proc.	1.02635e-05
Perovskite_additives_concentrations_0.057	Perovskite	Proc.	1.02588e-05
ETL_additives_compounds_Oleamide	ETL	Proc.	1.02492e-05
ETL_deposition_procedure_ ALD	ETL	Proc.	1.02382e-05
avg_heat_of_vaporization_(kJ/mol)_	Perovskite	Mat.	3.65571e-05
ETL_stack_sequence_MATS	ETL	Mat.	1.01919e-05
Perovskite_deposition_procedure_Inkjet printing >> Diffusion-gas reaction	Perovskite	Proc.	1.01792e-05
HTL_stack_sequence_M104	HTL	Mat.	1.01477e-05
ETL_additives_compounds_NH4Cl	ETL	Proc.	1.01387e-05
ETL_deposition_reaction_solutions_compounds_ TiO2 paste	ETL	Proc.	1.01e-05
ETL_deposition_procedure_ Screen printing >> CBD	ETL	Proc.	1.00934e-05
Perovskite_additives_compounds_BMImI; LiI	Perovskite	Proc.	1.00863e-05
Perovskite_deposition_procedure_Single crystal growth	Perovskite	Proc.	1.00616e-05
Perovskite_additives_compounds_KHQSA	Perovskite	Proc.	1.00614e-05
avg_ionic_radius	Perovskite	Mat.	-0.000207553
Perovskite_deposition_quenching_media_additives_concentrations_3 mg/ml	Perovskite	Proc.	1.00478e-05
ETL_additives_compounds_NbCl5	ETL	Proc.	1.00401e-05
ETL_deposition_reaction_solutions_concentrations_ 10 mg/ml; 10 mg/ml	ETL	Proc.	1.00328e-05
HTL_stack_sequence_F6-TCNNQ	HTL	Mat.	1.00063e-05
HTL_stack_sequence_PO-Spiro	HTL	Mat.	1.00049e-05
HTL_additives_compounds_Undoped	HTL	Proc.	9.99091e-06
Perovskite_deposition_synthesis_atmosphere_Unknown >> Vacuum	Perovskite	Proc.	9.98972e-06
Perovskite_additives_concentrations_0.097 mol%	Perovskite	Proc.	9.98402e-06
Perovskite_additives_concentrations_0.0002	Perovskite	Proc.	9.97974e-06
Perovskite_deposition_solvents_mixing_ratios_1 >> 1; 99	Perovskite	Proc.	9.97887e-06
HTL_stack_sequence_CsSnBr3-QDs	HTL	Mat.	9.9431e-06
avg_l_quantum_number	Perovskite	Mat.	0.000264635
Perovskite_additives_compounds_E2CA	Perovskite	Proc.	9.92456e-06
Perovskite_deposition_thermal_annealing_time_30.0 >> 10.0	Perovskite	Proc.	9.92297e-06
ETL_stack_sequence_PFN	ETL	Mat.	9.86324e-06
Perovskite_additives_concentrations_4 mg/ml; 4 mg/ml; 4 mg/ml	Perovskite	Proc.	9.85894e-06
Perovskite_additives_compounds_Phenylethyl ammonium iodide	Perovskite	Proc.	9.82712e-06
Perovskite_additives_compounds_TSC	Perovskite	Proc.	9.82672e-06
HTL_stack_sequence_NBP-BC	HTL	Mat.	9.82607e-06
ETL_stack_sequence_ C60-5a	ETL	Mat.	9.80411e-06
HTL_additives_compounds_2-Py; Li-TFSI	HTL	Proc.	9.79101e-06
ETL_deposition_procedure_Spin-coating >> CBD	ETL	Proc.	9.77324e-06
ETL_stack_sequence_ Aminocaproic acid; Caproic acid	ETL	Mat.	9.76954e-06
Perovskite_deposition_synthesis_atmosphere_Hydrazine; N2	Perovskite	Proc.	9.75199e-06
Perovskite_deposition_synthesis_atmosphere_N2 >> Vacuum >> N2	Perovskite	Proc.	9.73988e-06
Perovskite_deposition_solvents_mixing_ratios_9; 3	Perovskite	Proc.	9.73807e-06
Perovskite_additives_compounds_Acetate; SrI2	Perovskite	Proc.	9.73239e-06
HTL_stack_sequence_Azu-Bu	HTL	Mat.	9.71306e-06
HTL_stack_sequence_Co0.878Cu0.122O	HTL	Mat.	9.71109e-06
HTL_stack_sequence_AgI-QDs	HTL	Mat.	9.70306e-06
Perovskite_additives_compounds_PANI	Perovskite	Proc.	9.69711e-06
HTL_stack_sequence_ TPI-6MEO	HTL	Mat.	9.6852e-06
Perovskite_deposition_thermal_annealing_temperature_Unknown >> 180; 150	Perovskite	Proc.	9.68217e-06
Perovskite_additives_concentrations_0.02 M	Perovskite	Proc.	9.68067e-06
ETL_additives_compounds_UV	ETL	Proc.	9.66098e-06
HTL_stack_sequence_tetra-substituted azulene	HTL	Mat.	9.66058e-06
Perovskite_additives_concentrations_0.0056	Perovskite	Proc.	9.6544e-06
ETL_stack_sequence_C60; PhIm	ETL	Mat.	9.63662e-06
Perovskite_band_gap_1.588	Perovskite	Proc.	9.61965e-06
Perovskite_additives_compounds_Imidazole	Perovskite	Proc.	9.60398e-06
ETL_stack_sequence_ PCBB-2CN-2C8	ETL	Mat.	9.60004e-06
Perovskite_additives_concentrations_0.5 mg/m	Perovskite	Proc.	9.59827e-06
HTL_additives_concentrations_0.8 %	HTL	Proc.	9.59442e-06
ETL_deposition_reaction_solutions_compounds_ PCBM-60; PEG	ETL	Proc.	9.59187e-06
HTL_stack_sequence_TPA窶植NT窶慎PA	HTL	Mat.	9.58877e-06
ETL_stack_sequence_f-C60	ETL	Mat.	9.56518e-06
ETL_additives_compounds_ BF4	ETL	Proc.	9.50539e-06
ETL_stack_sequence_ZnO0.85Sn0.2O1.2	ETL	Mat.	9.49441e-06
HTL_stack_sequence_Carbon-nt; P3HT	HTL	Mat.	9.46781e-06
HTL_deposition_reaction_solutions_compounds_PTAA	HTL	Proc.	9.46561e-06
Perovskite_deposition_solvents_Dimethylacetamide	Perovskite	Proc.	9.46082e-06
Perovskite_deposition_solvents_mixing_ratios_4; 1; 0.25	Perovskite	Proc.	9.45992e-06
Perovskite_additives_concentrations_10	Perovskite	Proc.	9.45974e-06
Perovskite_additives_concentrations_0.1; nan	Perovskite	Proc.	9.4507e-06
Perovskite_additives_concentrations_nan; 1.5 mg/ml	Perovskite	Proc.	9.44317e-06
ETL_stack_sequence_PDBS-PDI	ETL	Mat.	9.40785e-06
Perovskite_deposition_thermal_annealing_time_10.0; 10.0 >> 120.0	Perovskite	Proc.	9.39556e-06
Perovskite_additives_concentrations_0.06	Perovskite	Proc.	9.38569e-06
Perovskite_additives_concentrations_2 mg/ml	Perovskite	Proc.	9.35874e-06
Perovskite_additives_compounds_PMMA	Perovskite	Proc.	9.34995e-06
ETL_additives_compounds_ TiCl4; Ethyl cellulose	ETL	Proc.	9.33533e-06
Perovskite_deposition_after_treatment_of_formed_perovskite_Vacuum oven annealing	Perovskite	Proc.	9.3277e-06
Perovskite_additives_compounds_MLAI	Perovskite	Proc.	9.32083e-06
Perovskite_deposition_solvents_mixing_ratios_7.33; 1	Perovskite	Proc.	9.31601e-06
ETL_additives_compounds_PEIE	ETL	Proc.	9.30073e-06
Perovskite_additives_compounds_Pb(CH3CH2COO)2	Perovskite	Proc.	9.25566e-06
ETL_stack_sequence_ TiO2-IO	ETL	Mat.	9.24569e-06
ETL_stack_sequence_SnO2-QDs	ETL	Mat.	9.23113e-06
ETL_stack_sequence_ C60; PhIm	ETL	Mat.	9.2306e-06
HTL_additives_compounds_DOBD	HTL	Proc.	9.22876e-06
ETL_deposition_procedure_ Spin-coating >> Plasma treatment	ETL	Proc.	9.20427e-06
HTL_additives_compounds_La	HTL	Proc.	9.1682e-06
Perovskite_additives_concentrations_0.5 mg/ml	Perovskite	Proc.	9.15576e-06
Perovskite_deposition_solvents_mixing_ratios_4; 1 >> 1 >> 1	Perovskite	Proc.	9.14138e-06
Perovskite_band_gap_1.624	Perovskite	Proc.	9.13412e-06
Perovskite_additives_concentrations_4 mg/ml	Perovskite	Proc.	9.13222e-06
HTL_deposition_reaction_solutions_compounds_FK209; Li-TFSI; Spiro-MeOTAD; TBP	HTL	Proc.	9.1255e-06
HTL_stack_sequence_PSQ2	HTL	Mat.	9.11847e-06
Perovskite_additives_compounds_TiO2-np	Perovskite	Proc.	9.09674e-06
HTL_additives_compounds_NH3	HTL	Proc.	9.08e-06
HTL_stack_sequence_BTTI-C6	HTL	Mat.	9.07854e-06
Backcontact_stack_sequence_SnO2-c	Back contact	Mat.	9.05648e-06
ETL_stack_sequence_ MgO-EA	ETL	Mat.	9.03612e-06
Perovskite_composition_b_ions_Ge; Sn	Perovskite	Mat.	9.02824e-06
ETL_additives_compounds_ Co-TFSI	ETL	Proc.	9.02425e-06
ETL_stack_sequence_ C-PCBSD	ETL	Mat.	9.01916e-06
ETL_stack_sequence_ MoS2	ETL	Mat.	9.00116e-06
Perovskite_deposition_thermal_annealing_temperature_Unknown >> 104.0	Perovskite	Proc.	8.99033e-06
Perovskite_additives_compounds_SQ63	Perovskite	Proc.	8.98736e-06
Perovskite_additives_concentrations_0.15; 0.1	Perovskite	Proc.	8.98567e-06
Perovskite_deposition_quenching_media_additives_concentrations_1 mg/ml	Perovskite	Proc.	8.98229e-06
Perovskite_additives_concentrations_0.7	Perovskite	Proc.	8.97869e-06
Perovskite_deposition_thermal_annealing_temperature_70; 100	Perovskite	Proc.	8.9704e-06
Perovskite_deposition_synthesis_atmosphere_relative_humidity_2	Perovskite	Proc.	8.96999e-06
Perovskite_additives_concentrations_20 mol%	Perovskite	Proc.	8.96815e-06
avg_MB_electonegativity	Perovskite	Mat.	-0.00216473
Perovskite_additives_compounds_Benzoquinone	Perovskite	Proc.	8.93479e-06
Perovskite_composition_none_stoichiometry_components_in_excess_CsI; MACl	Perovskite	Mat.	8.92811e-06
Perovskite_deposition_solvent_annealing_time_50.0	Perovskite	Proc.	8.88835e-06
ETL_deposition_reaction_solutions_compounds_Titanium diisopropoxide bis(acetylacetonate); TiO2-np	ETL	Proc.	8.88712e-06
Perovskite_pl_max_620.0	Perovskite	Proc.	8.87841e-06
Perovskite_deposition_quenching_media_mixing_ratios_1; 0.3	Perovskite	Proc.	8.8606e-06
Perovskite_deposition_substrate_temperature_140.0	Perovskite	Proc.	8.83637e-06
ETL_stack_sequence_PSe-PDI	ETL	Mat.	8.82417e-06
Perovskite_additives_compounds_h-TAc	Perovskite	Proc.	8.82327e-06
HTL_stack_sequence_Spiro-OBuTAD	HTL	Mat.	8.82076e-06
Perovskite_band_gap_1.546	Perovskite	Proc.	8.81514e-06
Perovskite_deposition_thermal_annealing_temperature_50.0 >> Unknown	Perovskite	Proc.	8.81094e-06
Perovskite_deposition_quenching_media_additives_compounds_tFM-PMAI	Perovskite	Proc.	8.80014e-06
ETL_deposition_procedure_Electrospraying	ETL	Proc.	8.79281e-06
Perovskite_deposition_solvents_mixing_ratios_5; 1 >> 1	Perovskite	Proc.	8.78923e-06
Perovskite_additives_compounds_Caffeine	Perovskite	Proc.	8.77873e-06
ETL_stack_sequence_WOx	ETL	Mat.	8.76533e-06
Perovskite_deposition_thermal_annealing_temperature_Unknown >> 210.0	Perovskite	Proc.	8.74191e-06
Perovskite_additives_compounds_GN-GQDs	Perovskite	Proc.	8.73897e-06
Backcontact_stack_sequence_ Graphite	Back contact	Mat.	8.72111e-06
HTL_stack_sequence_Ag-nw; PEDOT:PSS	HTL	Mat.	8.71816e-06
HTL_stack_sequence_mGO	HTL	Mat.	8.70896e-06
Perovskite_deposition_solvent_annealing_solvent_atmosphere_TBP	Perovskite	Proc.	8.69693e-06
Perovskite_deposition_thermal_annealing_time_10.0 >> 10.0 >> Unknown	Perovskite	Proc.	8.69382e-06
Perovskite_deposition_thermal_annealing_temperature_Unknown >> 115.0	Perovskite	Proc.	8.6832e-06
Perovskite_deposition_solvent_annealing_solvent_atmosphere_GBL	Perovskite	Proc.	8.66101e-06
ETL_stack_sequence_ CsCl	ETL	Mat.	8.62157e-06
Perovskite_additives_compounds_NMP	Perovskite	Proc.	8.60974e-06
ETL_stack_sequence_ DPC60	ETL	Mat.	8.60777e-06
Perovskite_deposition_quenching_media_Diethyl ether; Toluene	Perovskite	Proc.	8.60538e-06
HTL_stack_sequence_ pTPD	HTL	Mat.	8.58839e-06
Perovskite_additives_concentrations_0.6 mol%	Perovskite	Proc.	8.57099e-06
Perovskite_band_gap_2.26	Perovskite	Proc.	8.55382e-06
Perovskite_deposition_solvents_mixing_ratios_5; 4	Perovskite	Proc.	8.53427e-06
Perovskite_deposition_solvents_mixing_ratios_95; 1 >> 1	Perovskite	Proc.	8.53221e-06
Perovskite_additives_compounds_DA2PbI4	Perovskite	Proc.	8.52138e-06
ETL_deposition_procedure_ CVD	ETL	Proc.	8.50992e-06
Perovskite_deposition_procedure_Spin-coating >> Electrospraying	Perovskite	Proc.	8.4868e-06
HTL_stack_sequence_PTPD	HTL	Mat.	8.48567e-06
HTL_stack_sequence_Aminothiazolium iodide	HTL	Mat.	8.48082e-06
ETL_stack_sequence_ Al2O3-c	ETL	Mat.	8.47304e-06
HTL_additives_compounds_Glycerol	HTL	Proc.	8.45055e-06
ETL_deposition_reaction_solutions_concentrations_ 1.0 M	ETL	Proc.	8.44389e-06
Perovskite_deposition_thermal_annealing_temperature_70.0; 90.0; 100.0	Perovskite	Proc.	8.39024e-06
HTL_stack_sequence_pDPA-DBTP	HTL	Mat.	8.37905e-06
ETL_additives_compounds_Y	ETL	Proc.	8.36669e-06
HTL_additives_concentrations_ 5 vol%	HTL	Proc.	8.36659e-06
Substrate_stack_sequence_PDMS	Substrate	Mat.	8.36656e-06
Perovskite_deposition_thermal_annealing_time_Unknown >> 65.0	Perovskite	Proc.	8.35535e-06
Perovskite_deposition_thermal_annealing_temperature_100.0 >> 130.0	Perovskite	Proc.	8.3485e-06
Perovskite_deposition_thermal_annealing_temperature_75; 90	Perovskite	Proc.	8.34507e-06
HTL_stack_sequence_ PTAA	HTL	Mat.	8.33081e-06
HTL_additives_compounds_Li; Pb	HTL	Proc.	8.32727e-06
Perovskite_deposition_thermal_annealing_time_Unknown >> 600.0; 10.0	Perovskite	Proc.	8.32154e-06
ETL_stack_sequence_ Heparin-Na	ETL	Mat.	8.32112e-06
ETL_stack_sequence_ PN6	ETL	Mat.	8.32031e-06
Perovskite_composition_a_ions_FA; MA	Perovskite	Mat.	8.31875e-06
Perovskite_composition_b_ions_coefficients_0.15; 0.85	Perovskite	Mat.	8.31575e-06
Perovskite_deposition_quenching_media_additives_compounds_PbS-QDs	Perovskite	Proc.	8.31555e-06
Perovskite_composition_short_form_MASnI	Perovskite	Mat.	8.30181e-06
Perovskite_additives_compounds_TBAI3	Perovskite	Proc.	8.28942e-06
Backcontact_stack_sequence_SWCNTs	Back contact	Mat.	8.28509e-06
Perovskite_composition_a_ions_coefficients_1; 1	Perovskite	Mat.	8.27119e-06
HTL_stack_sequence_GO-nanoribbons	HTL	Mat.	8.24223e-06
HTL_stack_sequence_PBTTT-14	HTL	Mat.	8.24218e-06
Perovskite_deposition_after_treatment_of_formed_perovskite_met_40kHz; 5W; 4 min	Perovskite	Proc.	8.24114e-06
HTL_stack_sequence_H-Z2	HTL	Mat.	8.22976e-06
HTL_stack_sequence_ Cysteine	HTL	Mat.	8.2269e-06
HTL_stack_sequence_PVBT-TMA	HTL	Mat.	8.22056e-06
HTL_stack_sequence_PVBT-SO3	HTL	Mat.	8.21325e-06
HTL_stack_sequence_ Ta:Wox-np	HTL	Mat.	8.21293e-06
Perovskite_composition_c_ions_coefficients_0.9; 2.1	Perovskite	Mat.	8.18831e-06
Perovskite_deposition_quenching_media_additives_compounds_FAPbBr3-QDs	Perovskite	Proc.	8.1761e-06
HTL_stack_sequence_2F-SAM	HTL	Mat.	8.16679e-06
HTL_additives_compounds_NPB	HTL	Proc.	8.163e-06
ETL_stack_sequence_C-PDTON	ETL	Mat.	8.15204e-06
HTL_stack_sequence_NPB	HTL	Mat.	8.14334e-06
Perovskite_pl_max_633.0	Perovskite	Proc.	8.14287e-06
Perovskite_composition_short_form_MAPbBr	Perovskite	Mat.	8.1363e-06
Perovskite_additives_compounds_InCl2	Perovskite	Proc.	8.13479e-06
Perovskite_deposition_thermal_annealing_time_5.0; 2.0	Perovskite	Proc.	8.13183e-06
ETL_stack_sequence_ PFN; ZnO-np	ETL	Mat.	8.12736e-06
Perovskite_deposition_thermal_annealing_time_ 20.0	Perovskite	Proc.	8.12502e-06
ETL_stack_sequence_2PDI-0S	ETL	Mat.	8.11932e-06
HTL_stack_sequence_ZnPc-DPP-ZnPc	HTL	Mat.	8.11931e-06
Perovskite_pl_max_605.0	Perovskite	Proc.	8.10446e-06
Perovskite_deposition_thermal_annealing_time_15.0; 0.05 >> 4.0	Perovskite	Proc.	8.10412e-06
Perovskite_deposition_quenching_media_Chlorobenzene; Acetic acid	Perovskite	Proc.	8.09646e-06
avg_Melting_point_(K)	Perovskite	Mat.	-0.00398152
ETL_stack_sequence_ BZnTPP	ETL	Mat.	8.07628e-06
Perovskite_additives_concentrations_0.3 mg/perovskite_mmol	Perovskite	Proc.	8.03618e-06
ETL_additives_concentrations_25 vol%	ETL	Proc.	8.02681e-06
Perovskite_composition_a_ions_(pF1PEA); MA	Perovskite	Mat.	8.01036e-06
ETL_stack_sequence_ PCBM-60; Poly(N-vinylcarbazole)	ETL	Mat.	8.00111e-06
Perovskite_deposition_thermal_annealing_temperature_70.0 >> 115.0	Perovskite	Proc.	7.99338e-06
Perovskite_pl_max_812.0	Perovskite	Proc.	7.98768e-06
ETL_additives_compounds_Co	ETL	Proc.	7.97621e-06
ETL_additives_compounds_Graphdiyne	ETL	Proc.	7.96968e-06
HTL_stack_sequence_ TPBi	HTL	Mat.	7.95881e-06
Perovskite_additives_compounds_HC(NH2)2I窶哲aI	Perovskite	Proc.	7.9504e-06
Perovskite_additives_concentrations_0.0085	Perovskite	Proc.	7.95007e-06
Perovskite_deposition_thermal_annealing_temperature_Unknown >> 60.0	Perovskite	Proc.	7.94986e-06
HTL_additives_compounds_Br-BA	HTL	Proc.	7.9492e-06
HTL_stack_sequence_ P3CT-K	HTL	Mat.	7.93783e-06
Perovskite_additives_compounds_Cl; PVP	Perovskite	Proc.	7.93511e-06
ETL_stack_sequence_ Graphene	ETL	Mat.	7.92705e-06
Perovskite_additives_compounds_GeI2	Perovskite	Proc.	7.90353e-06
Perovskite_composition_c_ions_coefficients_0.15; 0.85	Perovskite	Mat.	7.89096e-06
Perovskite_additives_compounds_Cl; CuPc(tBU)4	Perovskite	Proc.	7.88422e-06
ETL_stack_sequence_MC-43	ETL	Mat.	7.88236e-06
Perovskite_additives_compounds_PbAc	Perovskite	Proc.	7.87598e-06
Perovskite_deposition_thermal_annealing_temperature_25; 70 >> 85	Perovskite	Proc.	7.82798e-06
Perovskite_additives_compounds_Sm(acac)3	Perovskite	Proc.	7.79645e-06
Perovskite_deposition_reaction_solutions_concentrations_0.5 M >> 40 mg/ml	Perovskite	Proc.	7.7849e-06
ETL_additives_compounds_ F	ETL	Proc.	7.78113e-06
Perovskite_composition_a_ions_(PDA); MA	Perovskite	Mat.	7.77618e-06
ETL_stack_sequence_ZnSe	ETL	Mat.	7.7694e-06
Perovskite_deposition_thermal_annealing_temperature_110.0 >> 120.0	Perovskite	Proc.	7.76797e-06
Perovskite_deposition_solvent_annealing_solvent_atmosphere_IPA	Perovskite	Proc.	7.76177e-06
ETL_additives_compounds_La	ETL	Proc.	7.74286e-06
Perovskite_deposition_after_treatment_of_formed_perovskite_met_40kHz; 10W; 2 min	Perovskite	Proc.	7.74097e-06
Perovskite_deposition_substrate_temperature_40	Perovskite	Proc.	7.72534e-06
ETL_deposition_thermal_annealing_temperature_100; 180	ETL	Proc.	7.72078e-06
Perovskite_additives_concentrations_0.15; 0.15; 0.004	Perovskite	Proc.	7.71479e-06
ETL_stack_sequence_ Ca(acac)2	ETL	Mat.	7.71412e-06
ETL_deposition_solvents_none	ETL	Proc.	7.70574e-06
Perovskite_additives_compounds_C60; PMMA	Perovskite	Proc.	7.69169e-06
HTL_stack_sequence_P3TAA	HTL	Mat.	7.67773e-06
Perovskite_additives_concentrations_9 mg/ml	Perovskite	Proc.	7.67615e-06
HTL_stack_sequence_PEH-9	HTL	Mat.	7.66924e-06
HTL_additives_compounds_PDMS	HTL	Proc.	7.639e-06
Perovskite_deposition_number_of_deposition_steps_4	Perovskite	Proc.	7.63082e-06
ETL_stack_sequence_ ImAcHcl	ETL	Mat.	7.60408e-06
ETL_deposition_procedure_ Hydrothermal >> Etching	ETL	Proc.	7.60249e-06
ETL_stack_sequence_ SWCNTs; TiO2-mp	ETL	Mat.	7.58728e-06
Perovskite_additives_concentrations_ 13 mg/ml	Perovskite	Proc.	7.58606e-06
HTL_additives_compounds_Au-np; Li-TFSI; TBP	HTL	Proc.	7.57474e-06
ETL_stack_sequence_ SrTiO3-mp	ETL	Mat.	7.56517e-06
Perovskite_additives_concentrations_0.0015	Perovskite	Proc.	7.56409e-06
ETL_additives_compounds_SnCl4	ETL	Proc.	7.56088e-06
ETL_stack_sequence_PCB-C8	ETL	Mat.	7.55972e-06
Perovskite_deposition_thermal_annealing_time_45.0 >> 45.0	Perovskite	Proc.	7.55584e-06
Perovskite_pl_max_785.3	Perovskite	Proc.	7.55249e-06
ETL_stack_sequence_PyCEE	ETL	Mat.	7.53897e-06
Perovskite_deposition_synthesis_atmosphere_Air >> Air; Methylamin	Perovskite	Proc.	7.53429e-06
ETL_stack_sequence_ PCBSD:GD	ETL	Mat.	7.53152e-06
HTL_stack_sequence_TRUX2	HTL	Mat.	7.52887e-06
Perovskite_composition_c_ions_coefficients_0.27; 2.73	Perovskite	Mat.	7.52683e-06
Perovskite_additives_compounds_Cu:NiO-np	Perovskite	Proc.	7.52676e-06
avg_Mendeleev_Number	Perovskite	Mat.	-6.29944e-05
Perovskite_deposition_thermal_annealing_time_1.0; 15.0	Perovskite	Proc.	7.51501e-06
ETL_stack_sequence_C60; C70	ETL	Mat.	7.50078e-06
Perovskite_composition_c_ions_coefficients_0.13; 2.87	Perovskite	Mat.	7.49051e-06
HTL_deposition_procedure_ Spin-coating	HTL	Proc.	7.48387e-06
ETL_stack_sequence_ MCA	ETL	Mat.	7.46443e-06
ETL_deposition_procedure_Sputtering >> Oxidation	ETL	Proc.	7.43815e-06
Perovskite_additives_compounds_CuBr2; RbI	Perovskite	Proc.	7.43394e-06
Perovskite_deposition_thermal_annealing_temperature_60 >> 200	Perovskite	Proc.	7.42592e-06
Backcontact_deposition_procedure_ Sputtering	Back contact	Proc.	7.41543e-06
HTL_deposition_thermal_annealing_atmosphere_Air	HTL	Proc.	7.40835e-06
Perovskite_deposition_thermal_annealing_temperature_60.0; 100 >> 100.0	Perovskite	Proc.	7.40588e-06
ETL_additives_compounds_TBABF4	ETL	Proc.	7.40553e-06
avg_Metal	Perovskite	Mat.	-5.46958e-05
Perovskite_deposition_solvent_annealing_solvent_atmosphere_4窶診luoroaniline	Perovskite	Proc.	7.3848e-06
HTL_stack_sequence_DM	HTL	Mat.	7.38471e-06
Perovskite_deposition_quenching_media_Ethyl acetate; IPA	Perovskite	Proc.	7.36258e-06
HTL_stack_sequence_YK1	HTL	Mat.	7.35303e-06
Perovskite_pl_max_655.0	Perovskite	Proc.	7.35287e-06
ETL_stack_sequence_Fullerene @ F4	ETL	Mat.	7.34407e-06
Perovskite_deposition_after_treatment_of_formed_perovskite_met_10 pulses per sample	Perovskite	Proc.	7.33728e-06
Perovskite_deposition_after_treatment_of_formed_perovskite_Repeated Spin-coating	Perovskite	Proc.	7.331e-06
ETL_deposition_reaction_solutions_concentrations_33 wt%	ETL	Proc.	7.32729e-06
HTL_stack_sequence_ NiO-c	HTL	Mat.	7.32447e-06
ETL_deposition_reaction_solutions_concentrations_200 mM >> nan >> nan	ETL	Proc.	7.30817e-06
HTL_stack_sequence_DH-MeO-FDPA	HTL	Mat.	7.30207e-06
Perovskite_deposition_thermal_annealing_temperature_70; 250	Perovskite	Proc.	7.30027e-06
ETL_additives_concentrations_0.2 mM/ml	ETL	Proc.	7.28676e-06
Perovskite_deposition_after_treatment_of_formed_perovskite_Washed with IPA	Perovskite	Proc.	7.25986e-06
HTL_additives_compounds_Li-bisLi-TFSI; TBP	HTL	Proc.	7.24975e-06
ETL_stack_sequence_PCBM-60; Zn0.8Cd0.2S-np	ETL	Mat.	7.24686e-06
Perovskite_additives_concentrations_10.0	Perovskite	Proc.	7.24357e-06
Substrate_supplier_Unknown	Substrate	Proc.	7.2408e-06
avg_metallic_valence	Perovskite	Mat.	0.000172187
HTL_stack_sequence_CuGaO2-np	HTL	Mat.	7.23031e-06
ETL_stack_sequence_Plastic foam	ETL	Mat.	7.21838e-06
Perovskite_deposition_thermal_annealing_temperature_180.0 >> 150.0	Perovskite	Proc.	7.21233e-06
ETL_stack_sequence_Zn2SnO4	ETL	Mat.	7.19533e-06
Perovskite_additives_compounds_H2O; KBr	Perovskite	Proc.	7.19261e-06
ETL_stack_sequence_ C60-N	ETL	Mat.	7.18579e-06
HTL_stack_sequence_Spiro-OEtTAD	HTL	Mat.	7.17284e-06
HTL_stack_sequence_MC-43	HTL	Mat.	7.17205e-06
Perovskite_additives_compounds_Hydrazinium chloride; SnF2	Perovskite	Proc.	7.16787e-06
Perovskite_additives_concentrations_30 wt%	Perovskite	Proc.	7.13948e-06
Perovskite_additives_concentrations_30 mg/ml	Perovskite	Proc.	7.13695e-06
HTL_additives_compounds_CuI	HTL	Proc.	7.13406e-06
Perovskite_additives_compounds_ITIC-Th	Perovskite	Proc.	7.13296e-06
Perovskite_band_gap_1.633	Perovskite	Proc.	7.13075e-06
HTL_stack_sequence_TPDI	HTL	Mat.	7.12956e-06
Perovskite_deposition_synthesis_atmosphere_Dry air >> MAI	Perovskite	Proc.	7.12946e-06
ETL_stack_sequence_nTi-MOF	ETL	Mat.	7.12758e-06
HTL_stack_sequence_Graphene; TSHBC @ 5:1	HTL	Mat.	7.12222e-06
ETL_stack_sequence_SrTiO3-c	ETL	Mat.	7.12054e-06
Perovskite_deposition_reaction_solutions_compounds_nan >> NH3I(CH2)2O(CH2)2O(CH2)2NH3I	Perovskite	Proc.	7.10848e-06
Perovskite_deposition_solvents_mixing_ratios_95; 5 >> 1	Perovskite	Proc.	7.10095e-06
ETL_stack_sequence_TiP2-c	ETL	Mat.	7.09014e-06
HTL_stack_sequence_TPA2C	HTL	Mat.	7.0896e-06
HTL_deposition_procedure_Lamination	HTL	Proc.	7.08731e-06
Perovskite_additives_concentrations_5 wt%	Perovskite	Proc.	7.05376e-06
HTL_stack_sequence_Th-OMeTPA	HTL	Mat.	7.04453e-06
ETL_stack_sequence_ SiW11O39-POM	ETL	Mat.	7.03802e-06
Perovskite_deposition_thermal_annealing_time_0.12	Perovskite	Proc.	7.03126e-06
Perovskite_deposition_thermal_annealing_temperature_70 >> 70	Perovskite	Proc.	7.03046e-06
Perovskite_deposition_solvents_mixing_ratios_5; 1 >> 3; 7	Perovskite	Proc.	7.01183e-06
HTL_additives_compounds_FK209; LiNO3	HTL	Proc.	7.00822e-06
Perovskite_additives_compounds_NH4I	Perovskite	Proc.	7.00313e-06
ETL_deposition_reaction_solutions_concentrations_6 mg/ml	ETL	Proc.	6.99187e-06
Perovskite_deposition_solvent_annealing_solvent_atmosphere_Acetic acid; Chlorobenzene	Perovskite	Proc.	6.9869e-06
Perovskite_deposition_thermal_annealing_time_3.0 >> 5.0 >> 5.0	Perovskite	Proc.	6.9836e-06
Backcontact_stack_sequence_TeO2	Back contact	Mat.	6.98145e-06
Perovskite_additives_concentrations_nan; 2 %	Perovskite	Proc.	6.96721e-06
Perovskite_deposition_quenching_media_additives_concentrations_5 mg/ml	Perovskite	Proc.	6.95913e-06
ETL_stack_sequence_ MPMIC60	ETL	Mat.	6.95748e-06
Perovskite_deposition_quenching_media_mixing_ratios_24; 1	Perovskite	Proc.	6.94969e-06
Perovskite_additives_compounds_Cl; PTAI	Perovskite	Proc.	6.94283e-06
avg_Metalliod	Perovskite	Mat.	7.3926e-06
ETL_stack_sequence_ MgO	ETL	Mat.	6.92288e-06
Perovskite_additives_compounds_DEACl	Perovskite	Proc.	6.92195e-06
Perovskite_additives_concentrations_2.5 wt%; 0.15 wt%	Perovskite	Proc.	6.92168e-06
Perovskite_deposition_solvents_mixing_ratios_1 >> 9; 1000	Perovskite	Proc.	6.91744e-06
Backcontact_stack_sequence_ PH 1000	Back contact	Mat.	6.90826e-06
Perovskite_deposition_thermal_annealing_temperature_42.0	Perovskite	Proc.	6.89718e-06
Perovskite_deposition_solvents_mixing_ratios_9; 1.2	Perovskite	Proc.	6.89529e-06
HTL_additives_compounds_Benzoyl peroxide	HTL	Proc.	6.89476e-06
Perovskite_composition_short_form_CsFAMAPbSnBrI	Perovskite	Mat.	6.87591e-06
HTL_stack_sequence_ TPTPA; MoO3	HTL	Mat.	6.87381e-06
Perovskite_deposition_thermal_annealing_temperature_Unknown >> 80	Perovskite	Proc.	6.86714e-06
ETL_deposition_thermal_annealing_temperature_500	ETL	Proc.	6.86513e-06
HTL_stack_sequence_2PACz	HTL	Mat.	6.86343e-06
Perovskite_additives_concentrations_5 %; 7.5 %	Perovskite	Proc.	6.85905e-06
Perovskite_additives_compounds_BCP; Cl	Perovskite	Proc.	6.85101e-06
Perovskite_deposition_after_treatment_of_formed_perovskite_Pressed with dotted stamp	Perovskite	Proc.	6.84631e-06
Perovskite_deposition_thermal_annealing_time_15.0; 10.0; 60.0	Perovskite	Proc.	6.84301e-06
HTL_deposition_reaction_solutions_volumes_1.5	HTL	Proc.	6.82968e-06
Perovskite_composition_c_ions_coefficients_3	Perovskite	Mat.	6.81276e-06
ETL_additives_concentrations_1.0 mol%	ETL	Proc.	6.80599e-06
ETL_additives_compounds_ Eu	ETL	Proc.	6.78108e-06
HTL_stack_sequence_CW4	HTL	Mat.	6.77572e-06
HTL_stack_sequence_CuI; CuSCN	HTL	Mat.	6.77568e-06
ETL_stack_sequence_a-DMEC70	ETL	Mat.	6.77485e-06
HTL_deposition_procedure_Gelation	HTL	Proc.	6.76959e-06
ETL_stack_sequence_Fe2O3-np	ETL	Mat.	6.76931e-06
HTL_stack_sequence_XSln847	HTL	Mat.	6.7693e-06
HTL_additives_concentrations_4 %	HTL	Proc.	6.7655e-06
Perovskite_deposition_solvents_mixing_ratios_9; 1 >> 1 >> 1	Perovskite	Proc.	6.73657e-06
HTL_stack_sequence_TbT-3	HTL	Mat.	6.72835e-06
Perovskite_deposition_procedure_Drop-infiltration >> CBD	Perovskite	Proc.	6.72279e-06
ETL_additives_compounds_Ti3C2	ETL	Proc.	6.71239e-06
Perovskite_pl_max_813.0	Perovskite	Proc.	6.71225e-06
avg_Miracle_Radius_[pm]	Perovskite	Mat.	0
ETL_deposition_reaction_solutions_temperature_ 450	ETL	Proc.	6.70613e-06
Substrate_stack_sequence_ PET	Substrate	Mat.	6.70092e-06
HTL_stack_sequence_YN3	HTL	Mat.	6.69839e-06
ETL_deposition_reaction_solutions_temperature_ 25	ETL	Proc.	6.68462e-06
Perovskite_additives_compounds_ME	Perovskite	Proc.	6.67933e-06
ETL_deposition_thermal_annealing_time_60.0	ETL	Proc.	6.67558e-06
Perovskite_deposition_thermal_annealing_temperature_200; 105	Perovskite	Proc.	6.66298e-06
HTL_stack_sequence_Fu-OMeTPA	HTL	Mat.	6.66008e-06
HTL_additives_compounds_Carbon-nt@G; Li-TFSI; TBP	HTL	Proc.	6.66006e-06
Perovskite_composition_short_form_FAMAPbSnBrI	Perovskite	Mat.	6.65408e-06
Perovskite_deposition_after_treatment_of_formed_perovskite_UV laser radiation	Perovskite	Proc.	6.64465e-06
Perovskite_storage_time_until_next_deposition_step_240.0	Perovskite	Proc.	6.64241e-06
HTL_stack_sequence_BDT-4D	HTL	Mat.	6.64062e-06
Perovskite_additives_compounds_Polyvinylalkolhol	Perovskite	Proc.	6.61871e-06
HTL_stack_sequence_CuO-nw	HTL	Mat.	6.61119e-06
HTL_stack_sequence_PEDOT; Spiro-MeOTAD	HTL	Mat.	6.60991e-06
ETL_stack_sequence_ZnCsO	ETL	Mat.	6.59839e-06
Perovskite_additives_compounds_Polystyrene	Perovskite	Proc.	6.58747e-06
Perovskite_additives_concentrations_0.3 vol%	Perovskite	Proc.	6.58367e-06
ETL_stack_sequence_SnO2	ETL	Mat.	6.58058e-06
Perovskite_additives_compounds_BAI; PEG	Perovskite	Proc.	6.57863e-06
ETL_stack_sequence_ SnO2; TiO2-mp	ETL	Mat.	6.57532e-06
ETL_stack_sequence_ F-C60; bis-C60	ETL	Mat.	6.57268e-06
HTL_stack_sequence_HTM-P1	HTL	Mat.	6.55782e-06
Perovskite_deposition_solvents_none >> IPA >> IPA	Perovskite	Proc.	6.55522e-06
Substrate_stack_sequence_ PEN	Substrate	Mat.	6.53085e-06
Perovskite_deposition_thermal_annealing_temperature_40.0; 160.0	Perovskite	Proc.	6.52837e-06
Perovskite_additives_compounds_Cl; Au-CZTS	Perovskite	Proc.	6.52582e-06
Perovskite_deposition_thermal_annealing_time_1.0 >> 5.0	Perovskite	Proc.	6.51881e-06
Perovskite_deposition_thermal_annealing_time_2.0 >> 4.0	Perovskite	Proc.	6.51053e-06
HTL_stack_sequence_MPA-BTTI	HTL	Mat.	6.50739e-06
Backcontact_deposition_procedure_ Magnetron sputtering	Back contact	Proc.	6.5043e-06
HTL_stack_sequence_XOP	HTL	Mat.	6.49959e-06
Perovskite_additives_compounds_Cl; Eu(acac)3	Perovskite	Proc.	6.48735e-06
HTL_stack_sequence_PTAA-1F	HTL	Mat.	6.48311e-06
Perovskite_deposition_thermal_annealing_temperature_70 >> 150	Perovskite	Proc.	6.48029e-06
Perovskite_additives_compounds_Cl; CNT-NH2	Perovskite	Proc.	6.46926e-06
Perovskite_deposition_thermal_annealing_time_Unknown >> 200.0	Perovskite	Proc.	6.45589e-06
ETL_stack_sequence_ SnO	ETL	Mat.	6.448e-06
Perovskite_deposition_quenching_media_mixing_ratios_1; 0.06	Perovskite	Proc.	6.44617e-06
HTL_stack_sequence_PDTSTTz-4	HTL	Mat.	6.44414e-06
Perovskite_deposition_thermal_annealing_time_30.0; 3.0 >> 15.0	Perovskite	Proc.	6.4389e-06
HTL_additives_compounds_D-TBP; Li-TFSI	HTL	Proc.	6.43346e-06
Perovskite_deposition_thermal_annealing_time_5.0; 5.0; 5.0; 10.0; 10.0; 10.0; 10.0; 90.0	Perovskite	Proc.	6.42754e-06
Perovskite_additives_concentrations_nan; 0.0075	Perovskite	Proc.	6.42695e-06
HTL_stack_sequence_IDF-SFXPh	HTL	Mat.	6.42626e-06
HTL_additives_compounds_ FK269; Li-TFSI; TBP	HTL	Proc.	6.41737e-06
ETL_deposition_thermal_annealing_temperature_90	ETL	Proc.	6.413e-06
ETL_stack_sequence_PCBM-60; PCBDAN	ETL	Mat.	6.41099e-06
Perovskite_deposition_quenching_media_Isopropyl acetate; Toluene	Perovskite	Proc.	6.40417e-06
Perovskite_deposition_quenching_media_additives_compounds_PDMS	Perovskite	Proc.	6.39454e-06
Perovskite_composition_a_ions_(TBA); Cs; FA; MA	Perovskite	Mat.	6.39166e-06
ETL_deposition_procedure_Sputering	ETL	Proc.	6.37707e-06
Perovskite_additives_compounds_PF-0	Perovskite	Proc.	6.37246e-06
ETL_deposition_procedure_ Doctor blading	ETL	Proc.	6.36897e-06
Perovskite_additives_compounds_TACl	Perovskite	Proc.	6.36486e-06
Perovskite_additives_compounds_TDZDT	Perovskite	Proc.	6.36072e-06
HTL_stack_sequence_V2O5	HTL	Mat.	6.359e-06
HTL_additives_compounds_ AgSbF6	HTL	Proc.	6.35899e-06
HTL_stack_sequence_dly-2	HTL	Mat.	6.3562e-06
ETL_stack_sequence_ graphite nanofibers	ETL	Mat.	6.34929e-06
ETL_stack_sequence_ TiO2-np	ETL	Mat.	6.34387e-06
HTL_additives_compounds_F-graphene	HTL	Proc.	6.34382e-06
Perovskite_composition_b_ions_coefficients_0.98; 0.02	Perovskite	Mat.	6.33973e-06
HTL_additives_concentrations_18 uL(1MACN); 29 uL(1MCB)	HTL	Proc.	6.33898e-06
Perovskite_composition_c_ions_coefficients_0.05; 2.95	Perovskite	Mat.	6.33743e-06
HTL_stack_sequence_MoO3	HTL	Mat.	6.32767e-06
Perovskite_pl_max_775	Perovskite	Proc.	6.32645e-06
ETL_additives_compounds_ B; F	ETL	Proc.	6.32117e-06
HTL_additives_concentrations_1.0 wt%	HTL	Proc.	6.31621e-06
Perovskite_deposition_solvents_mixing_ratios_1; 0.02	Perovskite	Proc.	6.31514e-06
Perovskite_deposition_quenching_media_mixing_ratios_92; 8	Perovskite	Proc.	6.30388e-06
HTL_additives_compounds_ Ag; Cu	HTL	Proc.	6.30268e-06
ETL_stack_sequence_ ZnO-mp	ETL	Mat.	6.30228e-06
ETL_additives_compounds_DBU	ETL	Proc.	6.30154e-06
Perovskite_additives_compounds_Eu(Ac)3	Perovskite	Proc.	6.30149e-06
Perovskite_deposition_thermal_annealing_time_Unknown >> Unknown >> 30.0	Perovskite	Proc.	6.29983e-06
Perovskite_composition_b_ions_coefficients_0.95; 0.05	Perovskite	Mat.	6.29832e-06
Perovskite_additives_compounds_l-alfa-phosphatidylcholine; Methylammoniumhypophosphite; NH4Cl	Perovskite	Proc.	6.29508e-06
HTL_stack_sequence_YKP03	HTL	Mat.	6.29485e-06
Perovskite_additives_concentrations_0.35; 0.038	Perovskite	Proc.	6.28318e-06
Perovskite_additives_compounds_Polyurethane	Perovskite	Proc.	6.27373e-06
ETL_stack_sequence_PO-TAZ	ETL	Mat.	6.27259e-06
Backcontact_stack_sequence_TETA-Graphene	Back contact	Mat.	6.2717e-06
HTL_stack_sequence_PIF8-TAA	HTL	Mat.	6.26476e-06
Perovskite_additives_compounds_E-g-C3N4-np	Perovskite	Proc.	6.23554e-06
ETL_stack_sequence_ Graphene-QDs	ETL	Mat.	6.23069e-06
HTL_stack_sequence_OCNR; PEDOT:PSS	HTL	Mat.	6.22501e-06
Perovskite_deposition_synthesis_atmosphere_ N2	Perovskite	Proc.	6.22136e-06
HTL_additives_compounds_Mg	HTL	Proc.	6.22126e-06
avg_Mulliken_EN	Perovskite	Mat.	-0.000594858
Perovskite_additives_concentrations_0.05 mg/ml	Perovskite	Proc.	6.21833e-06
Perovskite_additives_concentrations_10 vol%	Perovskite	Proc.	6.21487e-06
Perovskite_band_gap_1.599	Perovskite	Proc.	6.21352e-06
HTL_stack_sequence_TPB(2-MeOTAD)	HTL	Mat.	6.21048e-06
ETL_additives_compounds_Ti(acac)2	ETL	Proc.	6.20347e-06
Substrate_stack_sequence_ APTES	Substrate	Mat.	6.20107e-06
Perovskite_additives_compounds_BP-QDs	Perovskite	Proc.	6.19768e-06
HTL_additives_concentrations_0.15	HTL	Proc.	6.16999e-06
Perovskite_pl_max_637.0	Perovskite	Proc.	6.16919e-06
Perovskite_deposition_thermal_annealing_temperature_Unknown >> 150.0; 100	Perovskite	Proc.	6.16613e-06
HTL_stack_sequence_MoS2; PEDOT:PSS	HTL	Mat.	6.15674e-06
Perovskite_deposition_after_treatment_of_formed_perovskite_met_50 W/cm2; 2.50 s	Perovskite	Proc.	6.13822e-06
Perovskite_deposition_thermal_annealing_time_38.0	Perovskite	Proc.	6.13803e-06
HTL_stack_sequence_P1C1	HTL	Mat.	6.13408e-06
Perovskite_additives_compounds_BCP	Perovskite	Proc.	6.13032e-06
Perovskite_deposition_thermal_annealing_temperature_105.0 >> 105.0 >> Unknown	Perovskite	Proc.	6.12495e-06
Perovskite_additives_concentrations_nan; 0.005	Perovskite	Proc.	6.122e-06
Backcontact_stack_sequence_ Graphene	Back contact	Mat.	6.12067e-06
Perovskite_deposition_after_treatment_of_formed_perovskite_Stored at elavated temperature	Perovskite	Proc.	6.11762e-06
Perovskite_composition_a_ions_coefficients_ 1	Perovskite	Mat.	6.11548e-06
Perovskite_additives_concentrations_2.5 mol%	Perovskite	Proc.	6.11156e-06
HTL_stack_sequence_ Graphene oxide	HTL	Mat.	6.11005e-06
Perovskite_additives_compounds_Cl; DL-malicacid	Perovskite	Proc.	6.10809e-06
ETL_stack_sequence_ (EMIM)PF6	ETL	Mat.	6.10761e-06
Perovskite_additives_compounds_Tea Polyphenol	Perovskite	Proc.	6.10313e-06
Substrate_stack_sequence_ Ni	Substrate	Mat.	6.09323e-06
Backcontact_stack_sequence_Ca	Back contact	Mat.	6.08892e-06
ETL_deposition_reaction_solutions_concentrations_ nan	ETL	Proc.	6.08722e-06
Perovskite_additives_concentrations_30 mol%	Perovskite	Proc.	6.0684e-06
Perovskite_deposition_solvents_purity_99%; 99%	Perovskite	Proc.	6.06536e-06
HTL_additives_compounds_Mo(tfd-CO2Me)3	HTL	Proc.	6.06473e-06
Perovskite_pl_max_821.0	Perovskite	Proc.	6.05961e-06
ETL_stack_sequence_CPTA	ETL	Mat.	6.05007e-06
Perovskite_additives_compounds_CdCl2	Perovskite	Proc.	6.03652e-06
Perovskite_additives_compounds_TPE-DPP4	Perovskite	Proc.	6.02668e-06
Perovskite_deposition_thermal_annealing_temperature_Unknown >> 300.0	Perovskite	Proc.	6.00778e-06
Perovskite_additives_compounds_g-CN	Perovskite	Proc.	6.00558e-06
ETL_additives_compounds_P123	ETL	Proc.	6.00395e-06
Perovskite_deposition_thermal_annealing_time_ 60.0	Perovskite	Proc.	6.00252e-06
Perovskite_additives_compounds_BaI2	Perovskite	Proc.	5.99684e-06
Perovskite_additives_compounds_Cl; HI; KOH	Perovskite	Proc.	5.98365e-06
Perovskite_additives_compounds_SnS-QDs	Perovskite	Proc.	5.97713e-06
HTL_stack_sequence_KR353	HTL	Mat.	5.96736e-06
Perovskite_deposition_reaction_solutions_concentrations_1.6 M	Perovskite	Proc.	5.96348e-06
Perovskite_deposition_solvents_DMF; DMSO; Methanol	Perovskite	Proc.	5.96254e-06
HTL_stack_sequence_D1	HTL	Mat.	5.95535e-06
HTL_stack_sequence_TPASBP	HTL	Mat.	5.95512e-06
Perovskite_additives_compounds_PCBM-60; PbF4	Perovskite	Proc.	5.94383e-06
ETL_stack_sequence_ FPI	ETL	Mat.	5.93526e-06
Perovskite_additives_compounds_MAOAc	Perovskite	Proc.	5.90852e-06
HTL_stack_sequence_XMP	HTL	Mat.	5.9015e-06
HTL_deposition_thermal_annealing_temperature_650	HTL	Proc.	5.88923e-06
HTL_stack_sequence_X-DVTPD	HTL	Mat.	5.88852e-06
Perovskite_deposition_thermal_annealing_temperature_50; 100; 160	Perovskite	Proc.	5.88607e-06
Backcontact_stack_sequence_Bi2Te3	Back contact	Mat.	5.88428e-06
HTL_additives_concentrations_0.01 %; nan; nan	HTL	Proc.	5.87765e-06
Perovskite_deposition_solvents_mixing_ratios_1 >> 100; 1	Perovskite	Proc.	5.86684e-06
Perovskite_deposition_thermal_annealing_time_2.0 >> 25.0	Perovskite	Proc.	5.86511e-06
Perovskite_additives_compounds_Cl; PEDOT:PSS	Perovskite	Proc.	5.85348e-06
Perovskite_deposition_after_treatment_of_formed_perovskite_met_40kHz; 10W; 1 min	Perovskite	Proc.	5.84903e-06
avg_Nonmetal	Perovskite	Mat.	-0.000159769
ETL_additives_compounds_Ethanolamine	ETL	Proc.	5.83538e-06
HTL_additives_compounds_DIO	HTL	Proc.	5.83186e-06
Perovskite_additives_concentrations_0.1; 0.05	Perovskite	Proc.	5.82442e-06
Perovskite_composition_short_form_MASnBrI	Perovskite	Mat.	5.82331e-06
HTL_stack_sequence_TPA-NADT-TPA	HTL	Mat.	5.82097e-06
Perovskite_deposition_thermal_annealing_temperature_Unknown >> Unknown >> 105.0	Perovskite	Proc.	5.81922e-06
HTL_additives_compounds_2-6-lutidin; Li-TFSI	HTL	Proc.	5.81771e-06
ETL_additives_compounds_Li	ETL	Proc.	5.8121e-06
Perovskite_deposition_thermal_annealing_time_10.0; 40.0	Perovskite	Proc.	5.81089e-06
Perovskite_composition_short_form_MASbI	Perovskite	Mat.	5.77779e-06
HTL_deposition_reaction_solutions_compounds_Graphene oxide	HTL	Proc.	5.77728e-06
Perovskite_deposition_thermal_annealing_temperature_90; 125	Perovskite	Proc.	5.76935e-06
HTL_stack_sequence_T40P	HTL	Mat.	5.76767e-06
HTL_stack_sequence_O5H-OMeDPA	HTL	Mat.	5.76433e-06
Perovskite_deposition_solvents_Octane >> Methyl acetate	Perovskite	Proc.	5.76417e-06
Perovskite_deposition_thermal_annealing_time_10.0 >> 10.0 >> 10.0 >> 10.0	Perovskite	Proc.	5.75718e-06
Perovskite_additives_compounds_Phenylethyl-ammonium iodide	Perovskite	Proc.	5.75534e-06
ETL_stack_sequence_ Hexamethylenetetramine	ETL	Mat.	5.73151e-06
Perovskite_deposition_synthesis_atmosphere_Unknown >> Air	Perovskite	Proc.	5.72819e-06
Perovskite_deposition_quenching_media_additives_concentrations_0.05	Perovskite	Proc.	5.72382e-06
HTL_stack_sequence_Vox	HTL	Mat.	5.72174e-06
HTL_additives_compounds_Zn(TFSI)2	HTL	Proc.	5.70134e-06
HTL_stack_sequence_Z30	HTL	Mat.	5.70059e-06
Perovskite_additives_compounds_BrPh-ThR	Perovskite	Proc.	5.68271e-06
Perovskite_deposition_thermal_annealing_temperature_95	Perovskite	Proc.	5.67577e-06
Perovskite_additives_compounds_TOAB	Perovskite	Proc.	5.66451e-06
ETL_stack_sequence_ Al2O3-np	ETL	Mat.	5.66273e-06
Perovskite_deposition_thermal_annealing_temperature_140.0 >> 145.0	Perovskite	Proc.	5.65883e-06
HTL_additives_compounds_Zn	HTL	Proc.	5.64971e-06
Perovskite_deposition_reaction_solutions_concentrations_nan; 1 M; 0.2 M; 0.2 M; 1.1 M >> 200 mM	Perovskite	Proc.	5.64475e-06
Perovskite_deposition_thermal_annealing_time_1.0; 1.0; 10.0	Perovskite	Proc.	5.64439e-06
Perovskite_deposition_reaction_solutions_concentrations_0.88 M; 1.1 M; 0.44 M	Perovskite	Proc.	5.6372e-06
Backcontact_stack_sequence_Metal	Back contact	Mat.	5.62882e-06
Perovskite_deposition_solvents_mixing_ratios_95; 5	Perovskite	Proc.	5.62868e-06
Perovskite_additives_concentrations_50 mg/ml; 1 mg/ml	Perovskite	Proc.	5.6219e-06
Perovskite_deposition_synthesis_atmosphere_Vacuum >> Unknown	Perovskite	Proc.	5.61577e-06
Perovskite_additives_compounds_HATNA	Perovskite	Proc.	5.61047e-06
Perovskite_deposition_solvents_mixing_ratios_9; 20	Perovskite	Proc.	5.60691e-06
Perovskite_additives_compounds_TBA	Perovskite	Proc.	5.60461e-06
Perovskite_deposition_after_treatment_of_formed_perovskite_met_45 deg. C	Perovskite	Proc.	5.59985e-06
ETL_additives_compounds_Ga	ETL	Proc.	5.59727e-06
Perovskite_additives_compounds_PbI2-bipyridine	Perovskite	Proc.	5.5912e-06
avg_Number_of_unfilled_d_valence_electrons	Perovskite	Mat.	-0.00326385
HTL_stack_sequence_PEDOT:P(SS-co-TFPMA)	HTL	Mat.	5.58486e-06
HTL_stack_sequence_DNA-CTMA	HTL	Mat.	5.57929e-06
Perovskite_deposition_thermal_annealing_temperature_140.0 >> 160.0	Perovskite	Proc.	5.57542e-06
Perovskite_deposition_thermal_annealing_time_15.0 >> 20.0	Perovskite	Proc.	5.57238e-06
HTL_deposition_procedure_Anti-solvent quenching	HTL	Proc.	5.56803e-06
HTL_stack_sequence_PBTI-C	HTL	Mat.	5.54629e-06
Perovskite_deposition_reaction_solutions_concentrations_3 M; 1 M	Perovskite	Proc.	5.53154e-06
Perovskite_additives_compounds_3F-PCBM-60	Perovskite	Proc.	5.51661e-06
Perovskite_deposition_solvent_annealing_solvent_atmosphere_Methanol	Perovskite	Proc.	5.51601e-06
HTL_stack_sequence_Carbon-QDs	HTL	Mat.	5.5132e-06
Perovskite_additives_concentrations_0.014	Perovskite	Proc.	5.51167e-06
Perovskite_band_gap_1.612	Perovskite	Proc.	5.51138e-06
HTL_deposition_procedure_ Dipp-coating	HTL	Proc.	5.5049e-06
Perovskite_additives_concentrations_ 0.05 mol%	Perovskite	Proc.	5.49802e-06
ETL_stack_sequence_C60(OH)16	ETL	Mat.	5.49066e-06
Perovskite_additives_concentrations_nan; 0.048 %	Perovskite	Proc.	5.4872e-06
HTL_stack_sequence_ PASP	HTL	Mat.	5.48359e-06
Perovskite_additives_compounds_PDMS	Perovskite	Proc.	5.48105e-06
Perovskite_pl_max_650	Perovskite	Proc.	5.46449e-06
ETL_deposition_procedure_Spin-coating >> Spin-coating	ETL	Proc.	5.46276e-06
HTL_additives_concentrations_2 wt%	HTL	Proc.	5.46253e-06
HTL_stack_sequence_ DEA	HTL	Mat.	5.46001e-06
Perovskite_deposition_solvents_mixing_ratios_5; 8	Perovskite	Proc.	5.45896e-06
Perovskite_deposition_aggregation_state_of_reactants_Gas >> Gas >> Gas	Perovskite	Proc.	5.45539e-06
HTL_stack_sequence_TPAC3M	HTL	Mat.	5.45414e-06
Perovskite_additives_concentrations_0.5; nan	Perovskite	Proc.	5.44904e-06
Perovskite_deposition_solvent_annealing_time_0.16666666666666666	Perovskite	Proc.	5.44313e-06
HTL_additives_concentrations_nan; 0.6 wt%; nan	HTL	Proc.	5.44024e-06
Perovskite_deposition_thermal_annealing_temperature_60.0 >> 60.0 >> 60.0 >> 60.0	Perovskite	Proc.	5.43993e-06
Perovskite_additives_compounds_Tetraethylorthosilicate	Perovskite	Proc.	5.43238e-06
HTL_stack_sequence_Z3	HTL	Mat.	5.43115e-06
avg_Number_of_unfilled_f_valence_electrons	Perovskite	Mat.	-0.000725709
ETL_additives_compounds_In	ETL	Proc.	5.41779e-06
ETL_stack_sequence_ Carbon	ETL	Mat.	5.41302e-06
Perovskite_pl_max_731.0	Perovskite	Proc.	5.41282e-06
ETL_stack_sequence_ NiCl2	ETL	Mat.	5.41182e-06
ETL_additives_compounds_2D graphene	ETL	Proc.	5.41148e-06
HTL_additives_compounds_JQ2; Li-TFSI; TBP	HTL	Proc.	5.40107e-06
Perovskite_additives_concentrations_0.46	Perovskite	Proc.	5.39646e-06
Perovskite_deposition_thermal_annealing_temperature_90; 150	Perovskite	Proc.	5.38867e-06
Perovskite_additives_concentrations_0.5; 0.5	Perovskite	Proc.	5.38375e-06
Perovskite_additives_concentrations_0.002 mg/ml	Perovskite	Proc.	5.3821e-06
Perovskite_additives_concentrations_0.2 mol%; 10 mol%	Perovskite	Proc.	5.38178e-06
ETL_stack_sequence_ ZnO-nw	ETL	Mat.	5.37173e-06
Perovskite_deposition_thermal_annealing_temperature_50.0 >> 50.0 >> 50.0 >> Unknown	Perovskite	Proc.	5.35616e-06
HTL_additives_concentrations_6 %	HTL	Proc.	5.35481e-06
Perovskite_deposition_solvents_mixing_ratios_39; 1 >> 1	Perovskite	Proc.	5.35163e-06
Perovskite_deposition_quenching_media_additives_compounds_ITIC; PCBM-60	Perovskite	Proc.	5.34775e-06
Perovskite_deposition_thermal_annealing_time_5.0; Unknown >> Unknown >> 30.0	Perovskite	Proc.	5.34207e-06
Perovskite_deposition_aggregation_state_of_reactants_Gas >> Liquid >> Liquid	Perovskite	Proc.	5.32742e-06
HTL_stack_sequence_ Propionic acid	HTL	Mat.	5.31891e-06
Perovskite_deposition_solvents_IPA >> DMF >> IPA	Perovskite	Proc.	5.31888e-06
ETL_stack_sequence_ Cs2CO3; MoO3	ETL	Mat.	5.3186e-06
Substrate_area_16.0	Substrate	Proc.	5.31137e-06
ETL_additives_compounds_Ethyl cellulose	ETL	Proc.	5.31073e-06
[truncated: 13,307 more rows]

## Sheet: Table S7
Table S7. Sorted raw feature importance before aggregation
	Feature Importance
Perovskite_deposition_quenching_induced_crystallisation_True	0.0624644
Perovskite_composition_leadfree_True	0.0365916
Cell_area_measured	0.0330239
dev_Atomic_Weight	0.0305122
ETL_thickness	0.0283473
Backcontact_thickness_list	0.0261992
Perovskite_composition_a_ions_coefficients_1	0.0241257
Perovskite_deposition_quenching_media_Unknown	0.0228222
Perovskite_thickness	0.0227761
Perovskite_deposition_quenching_induced_crystallisation_False	0.0215652
Perovskite_composition_leadfree_False	0.0192962
HTL_stack_sequence_PEDOT:PSS	0.0183307
dev_crystal_radius	0.0137851
HTL_thickness_list	0.0132861
Perovskite_deposition_solvents_DMF; DMSO >> IPA	0.0105049
HTL_stack_sequence_PTAA	0.0101066
Perovskite_composition_a_ions_FA; MA	0.00941342
Perovskite_deposition_solvents_GBL	0.00863778
dev_Density_(g/mL)	0.00670452
HTL_stack_sequence_Spiro-MeOTAD	0.00605894
avg_Melting_point_(K)	0.00595005
Perovskite_deposition_solvents_mixing_ratios_1	0.00577284
HTL_additives_compounds_Li-TFSI; TBP	0.00569077
Perovskite_deposition_solvents_DMF	0.00535037
avg_Cohesive_energy	0.00468597
Perovskite_deposition_solvents_DMF; DMSO	0.00447733
ETL_deposition_procedure_Spin-coating	0.00440116
ETL_stack_sequence_PCBM-60	0.00413021
HTL_stack_sequence_P3HT	0.00411045
Perovskite_deposition_thermal_annealing_temperature_100.0	0.00406393
Perovskite_deposition_thermal_annealing_time_10.0	0.00405771
Perovskite_deposition_synthesis_atmosphere_N2	0.00403075
Perovskite_additives_compounds_Cl	0.00382672
avg_MB_electonegativity	0.00380423
ETL_deposition_procedure_Spin-coating	0.00369614
dev_valence_d	0.00367597
Perovskite_deposition_synthesis_atmosphere_Unknown	0.00361277
ETL_additives_compounds_Unknown	0.00345431
max_Density_(g/mL)	0.00343293
ETL_deposition_procedure_ Spin-coating	0.00332702
range_Density_(g/mL)	0.00330189
Perovskite_deposition_thermal_annealing_time_15.0	0.00329516
dev_Number_of_unfilled_p_valence_electrons	0.00328972
avg_Zunger_radii_sum	0.00324803
Perovskite_deposition_synthesis_atmosphere_Air	0.00320787
avg_crystal_radius	0.00316737
ETL_stack_sequence_ TiO2-mp	0.00313031
dev_valence_p	0.00308384
Perovskite_deposition_thermal_annealing_temperature_Unknown	0.00303732
Backcontact_stack_sequence_Ag	0.00295115
dev_Number_of_unfilled_d_valence_electrons	0.00294401
Backcontact_deposition_procedure_Evaporation	0.00291126
Substrate_stack_sequence_ ITO	0.0029006
Perovskite_deposition_solvents_mixing_ratios_4; 1	0.00287289
avg_thermal_conductivity_(W/(m_K))_	0.00285262
Perovskite_deposition_thermal_annealing_time_Unknown	0.002842
Backcontact_stack_sequence_Au	0.00281789
ETL_stack_sequence_TiO2-c	0.00281631
dev_outer_shell_electrons	0.00280753
HTL_deposition_procedure_Spin-coating	0.00280101
Cell_semitransparent_True	0.0027454
Perovskite_deposition_procedure_Spin-coating >> Spin-coating	0.00260312
Backcontact_stack_sequence_Al	0.00248646
ETL_stack_sequence_TiO2-c	0.00243955
Perovskite_deposition_quenching_media_Toluene	0.00239508
Substrate_stack_sequence_ FTO	0.00229222
ETL_stack_sequence_SnO2-c	0.0022876
Perovskite_deposition_thermal_annealing_time_30.0	0.00226641
Perovskite_band_gap_1.6	0.00225711
Perovskite_deposition_thermal_annealing_time_60.0	0.00224117
ETL_stack_sequence_PCBM-60	0.00224001
Cell_semitransparent_False	0.0022382
HTL_additives_compounds_FK209; Li-TFSI; TBP	0.00220653
Perovskite_pl_max_770.0	0.00215178
ETL_deposition_procedure_Spray-pyrolys	0.00215022
dev_polarizability(A^3)	0.00214069
Perovskite_deposition_thermal_annealing_temperature_Unknown >> 150.0	0.00209742
Perovskite_deposition_solvents_DMF; GBL	0.00206363
HTL_stack_sequence_NiO-c	0.00196123
Perovskite_band_gap_estimation_basis_Composition	0.00193835
HTL_additives_compounds_Undoped	0.00192635
Perovskite_deposition_quenching_media_Chlorobenzene	0.00192573
dev_Allred-Rockow_electronegativity	0.00184077
ETL_stack_sequence_ BCP	0.00182557
avg_Boiling_Point_(K)	0.00182407
ETL_stack_sequence_ZnO-c	0.00180947
ETL_deposition_procedure_ Evaporation	0.00180345
Perovskite_deposition_thermal_annealing_time_5.0	0.00178643
Cell_architecture_nip	0.00174694
HTL_additives_compounds_TBP	0.00173942
Perovskite_deposition_thermal_annealing_temperature_100	0.00169732
dev_Covalent_Radius	0.00165998
dev_Gordy_electonegativity	0.00165213
ETL_stack_sequence_ [BMIM]BF4	0.00165196
Perovskite_deposition_procedure_Spin-coating	0.00164941
ETL_deposition_procedure_Spray-pyrolys	0.00160128
Substrate_stack_sequence_ rGO	0.00160106
Perovskite_composition_none_stoichiometry_components_in_excess_PbI2	0.00159869
avg_Number_of_unfilled_d_valence_electrons	0.00159547
dev_heat_atomization(kJ/mol)	0.00158443
dev_Pauling_Electronegativity	0.00157893
HTL_deposition_procedure_Evaporation	0.00156827
Perovskite_deposition_solvents_mixing_ratios_9; 1	0.00156127
Cell_architecture_pin	0.00155713
ETL_deposition_procedure_CBD	0.00151472
avg_Pauling_Electronegativity	0.001513
Perovskite_deposition_thermal_annealing_time_20.0	0.00149225
ETL_stack_sequence_ZnO-np	0.00147709
Perovskite_deposition_solvents_Unknown	0.00145654
Perovskite_deposition_solvents_mixing_ratios_3; 7	0.00144738
Substrate_stack_sequence_SLG	0.00144354
avg_heat_of_fusion_(kJ/mol)_	0.00140178
Perovskite_deposition_thermal_annealing_time_45.0	0.00139118
avg_valence_d	0.00138349
HTL_deposition_procedure_ Spin-coating	0.00136205
ETL_stack_sequence_SnO2-np	0.00135629
dev_1st_ionization_potential_(kJ/mol)	0.00134407
ETL_deposition_procedure_ALD	0.00130894
HTL_stack_sequence_NiO-mp	0.00129233
dev_Zunger_radii_sum	0.00128647
Perovskite_deposition_solvents_DMSO; GBL	0.0012715
ETL_stack_sequence_ C60	0.0012445
Perovskite_composition_none_stoichiometry_components_in_excess_MAI	0.00124394
Perovskite_deposition_procedure_Spin-coating >> CBD	0.00124211
ETL_deposition_procedure_Pulsed laser deposition	0.00122579
Perovskite_deposition_quenching_media_Diethyl ether	0.00121546
Perovskite_band_gap_1.55	0.00121022
avg_Allred-Rockow_electronegativity	0.00120301
Perovskite_deposition_thermal_annealing_temperature_90.0	0.00119852
HTL_deposition_procedure_Spin-coating	0.00118922
avg_heat_atomization(kJ/mol)	0.00118817
ETL_stack_sequence_C60	0.00117219
HTL_additives_compounds_Unknown	0.00115163
Perovskite_deposition_solvents_DMF >> IPA	0.0011475
dev_Mulliken_EN	0.00112109
dev_Atomic_Number	0.00111804
Perovskite_deposition_thermal_annealing_time_2.0	0.00111793
Perovskite_deposition_solvents_mixing_ratios_2; 3	0.00111712
Perovskite_deposition_synthesis_atmosphere_Ar	0.00111391
dev_Cohesive_energy	0.00110259
dev_ionic_radius	0.00110156
Perovskite_deposition_synthesis_atmosphere_N2 >> N2	0.00109203
HTL_stack_sequence_Cu2O	0.00108185
Perovskite_band_gap_1.5	0.00106641
Perovskite_pl_max_775.0	0.00105569
ETL_deposition_procedure_Evaporation	0.0010358
Perovskite_deposition_thermal_annealing_time_Unknown >> 60.0	0.00103435
Perovskite_deposition_solvents_DMSO	0.00103371
ETL_additives_compounds_Unknown	0.00100874
HTL_stack_sequence_CuI	0.00100779
dev_heat_of_vaporization_(kJ/mol)_	0.000997314
HTL_stack_sequence_PTPD	0.000988535
Perovskite_deposition_thermal_annealing_temperature_Unknown >> 100.0	0.000970368
avg_specific_heat_(J/g_K)_	0.000965185
Perovskite_deposition_synthesis_atmosphere_Air >> Air	0.000963684
avg_heat_of_vaporization_(kJ/mol)_	0.000956339
avg_polarizability(A^3)	0.000956049
ETL_stack_sequence_ZnO-c	0.000954181
Perovskite_pl_max_760.0	0.000954114
Perovskite_deposition_procedure_Ultrasonic spray >> Ultrasonic spray	0.000952857
Perovskite_deposition_thermal_annealing_time_Unknown >> 10.0	0.000950392
avg_Mulliken_EN	0.000927971
Perovskite_additives_concentrations_0.1	0.000886556
avg_metallic_valence	0.000882316
dev_MB_electonegativity	0.000854602
ETL_stack_sequence_ BCP	0.000841566
dev_specific_heat_(J/g_K)_	0.000841187
avg_Gordy_electonegativity	0.000839497
Perovskite_deposition_solvents_mixing_ratios_1; 1	0.000831813
Perovskite_deposition_aggregation_state_of_reactants_Liquid >> Liquid	0.000828961
Perovskite_deposition_thermal_annealing_time_40.0	0.000827654
Perovskite_deposition_thermal_annealing_temperature_110.0	0.000820881
avg_Mendeleev_Number	0.000811483
ETL_stack_sequence_ C60	0.000810907
dev_group	0.000802049
dev_metallic_valence	0.000801779
Perovskite_deposition_thermal_annealing_temperature_70.0	0.000800446
ETL_deposition_procedure_ Evaporation	0.000796862
dev_number_of_valence_electrons	0.000774782
ETL_stack_sequence_ZnO-np	0.000771923
ETL_additives_compounds_ Li-TFSI	0.000771337
Backcontact_stack_sequence_Carbon	0.000769135
Perovskite_pl_max_780.0	0.000764492
dev_Mendeleev_Number	0.00076156
ETL_stack_sequence_ PCBM-60	0.000757164
Perovskite_deposition_aggregation_state_of_reactants_Liquid	0.000753377
avg_1st_ionization_potential_(kJ/mol)	0.000752053
ETL_stack_sequence_CdS	0.000749936
Perovskite_deposition_thermal_annealing_time_90.0	0.000744719
Perovskite_deposition_number_of_deposition_steps_2	0.000739492
Perovskite_deposition_solvents_mixing_ratios_1 >> 1	0.000737849
ETL_deposition_procedure_ALD	0.000735569
Perovskite_deposition_solvents_mixing_ratios_1; 4	0.000729367
Perovskite_deposition_after_treatment_of_formed_perovskite_Washed with IPA	0.000724352
Cell_flexible_True	0.000718419
Cell_flexible_False	0.000716997
Perovskite_band_gap_1.61	0.000713196
Perovskite_deposition_thermal_annealing_time_30.0 >> 30.0	0.0007114
Perovskite_deposition_synthesis_atmosphere_relative_humidity_35 >> 35	0.000707659
ETL_stack_sequence_ LiF	0.000697277
Perovskite_band_gap_1.59	0.000687901
Perovskite_additives_compounds_Undoped	0.000685034
Backcontact_stack_sequence_ Ag	0.00067978
Perovskite_deposition_thermal_annealing_time_Unknown >> 20.0	0.000677711
avg_Covalent_Radius	0.000662754
dev_thermal_conductivity_(W/(m_K))_	0.000652139
ETL_deposition_procedure_ Spin-coating	0.000652027
avg_Density_(g/mL)	0.000648646
HTL_additives_concentrations_23 uL(90.9mg/mLACN); 39 uL	0.00064246
Substrate_stack_sequence_PET	0.000639832
Perovskite_deposition_solvents_mixing_ratios_3; 1	0.000631716
Perovskite_deposition_procedure_Inkjet printing	0.000630701
Perovskite_deposition_thermal_annealing_time_Unknown >> 30.0	0.000629271
HTL_stack_sequence_ Spiro-MeOTAD	0.000628958
Encapsulation_False	0.000628806
ETL_stack_sequence_ TiO2-np	0.000623473
Perovskite_deposition_thermal_annealing_temperature_70.0 >> 100.0	0.000614879
Perovskite_deposition_quenching_media_Ethyl acetate	0.000606119
HTL_stack_sequence_CuSCN	0.000605609
Perovskite_composition_b_ions_ Pb	0.000601973
Perovskite_deposition_thermal_annealing_temperature_70.0 >> Unknown	0.000601797
Encapsulation_True	0.000601736
Perovskite_deposition_thermal_annealing_temperature_95; 120	0.000600531
Perovskite_deposition_thermal_annealing_temperature_95.0	0.000599674
Perovskite_additives_concentrations_0.05	0.000598937
Perovskite_deposition_thermal_annealing_temperature_120.0	0.000597233
HTL_stack_sequence_TT1	0.000596035
Perovskite_deposition_number_of_deposition_steps_1	0.000593582
Perovskite_deposition_thermal_annealing_time_120.0	0.000585805
Perovskite_deposition_quenching_media_N2	0.000581116
Perovskite_deposition_thermal_annealing_time_6.0	0.000580843
Perovskite_deposition_thermal_annealing_temperature_150.0	0.000576865
HTL_additives_compounds_F4-TCNQ	0.000576605
ETL_stack_sequence_C60	0.00057378
HTL_additives_compounds_Li-TFSI	0.000570385
Perovskite_composition_c_ions_I	0.000569808
Perovskite_deposition_solvent_annealing_False	0.000568124
Backcontact_stack_sequence_ SLG	0.000567424
Perovskite_deposition_solvents_mixing_ratios_7; 3	0.000564467
Perovskite_deposition_thermal_annealing_temperature_70.0 >> 70.0	0.00056317
Perovskite_additives_compounds_Unknown	0.000563123
avg_ionic_radius	0.000553599
Perovskite_deposition_solvent_annealing_True	0.000550401
Perovskite_deposition_thermal_annealing_temperature_Unknown >> 150	0.000548553
ETL_stack_sequence_ ZnO-nanospheres	0.00054386
Perovskite_deposition_quenching_media_Dichloromethane	0.000541889
dev_Boiling_Point_(K)	0.000539043
Backcontact_stack_sequence_Cu	0.000537039
Perovskite_deposition_quenching_media_Anisole	0.000536661
Perovskite_composition_none_stoichiometry_components_in_excess_MA	0.000535881
Perovskite_deposition_thermal_annealing_temperature_80.0	0.000535129
Perovskite_deposition_synthesis_atmosphere_relative_humidity_75	0.000531769
Backcontact_stack_sequence_MoO3	0.000527971
Perovskite_deposition_thermal_annealing_time_15.0 >> Unknown	0.00052571
dev_Period	0.000521482
Perovskite_composition_b_ions_Pb	0.000521031
ETL_deposition_procedure_Sputtering	0.000515726
Perovskite_deposition_thermal_annealing_temperature_130.0	0.000515492
Perovskite_deposition_thermal_annealing_time_60.0; 30.0	0.000515113
Backcontact_stack_sequence_ Al	0.000512574
Perovskite_deposition_thermal_annealing_temperature_120.0 >> 100.0	0.000508588
Backcontact_stack_sequence_Carbon	0.000499792
Perovskite_deposition_thermal_annealing_time_Unknown >> 8.0	0.000498654
Perovskite_deposition_thermal_annealing_temperature_65; 100	0.000495992
avg_outer_shell_electrons	0.000492775
Perovskite_band_gap_1.56	0.000488438
ETL_stack_sequence_SnO2-c	0.000487215
dev_gilmor_number_of_valence_electron	0.000484802
ETL_additives_compounds_ TiCl4	0.000480747
HTL_deposition_procedure_Spray-pyrolys	0.000479557
HTL_stack_sequence_NiO-np	0.000478369
Perovskite_deposition_synthesis_atmosphere_Dry air >> Dry air	0.000477051
Backcontact_deposition_procedure_E-beam evaporation	0.000473184
Perovskite_deposition_thermal_annealing_temperature_Unknown >> 70.0	0.000473143
ETL_stack_sequence_ Al2O3-mp	0.000473044
Perovskite_composition_c_ions_coefficients_1; 2	0.000471881
Perovskite_composition_b_ions_coefficients_1.0	0.0004704
ETL_deposition_procedure_Evaporation	0.000467772
Perovskite_band_gap_1.58	0.000458932
HTL_stack_sequence_Graphene oxide	0.000455119
Perovskite_deposition_quenching_media_Chloroform	0.000453101
HTL_stack_sequence_NiMgLiO	0.000451233
Perovskite_deposition_thermal_annealing_time_1.0	0.000448552
Perovskite_deposition_procedure_Spin-coating >> Recrystallization	0.000444798
ETL_additives_compounds_ Unknown	0.000443772
dev_heat_of_fusion_(kJ/mol)_	0.000442455
dev_Melting_point_(K)	0.000441451
Perovskite_deposition_thermal_annealing_temperature_100.0 >> 100.0	0.000433957
Perovskite_deposition_synthesis_atmosphere_Dry air	0.000429708
Perovskite_band_gap_2.4	0.000429462
Backcontact_stack_sequence_ Au	0.000426124
Perovskite_additives_concentrations_0.25	0.000423787
HTL_deposition_aggregation_state_of_reactants_Liquid	0.000419021
Perovskite_additives_concentrations_0.01	0.000417043
Backcontact_deposition_procedure_ Evaporation	0.000416012
Perovskite_deposition_procedure_Spray-coating	0.000410114
Perovskite_composition_b_ions_coefficients_1	0.000408809
Perovskite_deposition_solvents_mixing_ratios_1 >> 4; 1	0.000404708
Perovskite_deposition_thermal_annealing_time_60.0 >> 30.0	0.000401079
avg_Atomic_Weight	0.000398693
Perovskite_band_gap_1.621	0.000396929
ETL_stack_sequence_Corrannulene-derivative	0.000392928
ETL_deposition_procedure_Unknown	0.000392411
ETL_deposition_procedure_ Hydrothermal	0.0003924
avg_Number_of_unfilled_f_valence_electrons	0.000390964
Perovskite_pl_max_765.0	0.000390291
HTL_stack_sequence_PPyra-ACD	0.000390166
Substrate_stack_sequence_PEN	0.000384926
HTL_stack_sequence_P3	0.000384169
ETL_stack_sequence_TiO2-np	0.000383737
ETL_stack_sequence_ ZnO-nw	0.000383271
avg_families	0.000375162
Perovskite_deposition_solvents_DMSO >> DMF; DMSO	0.000373136
Perovskite_deposition_thermal_annealing_time_Unknown >> 15.0	0.000372527
Perovskite_composition_c_ions_Br; I	0.000369014
Backcontact_stack_sequence_Au	0.000367037
ETL_stack_sequence_MgO-c	0.00036057
avg_Period	0.000354544
avg_Atomic_Number	0.000352043
ETL_stack_sequence_PEIE	0.000352016
HTL_stack_sequence_X59	0.000349351
dev_Atomic_Radius	0.000347905
Backcontact_deposition_procedure_Sputtering	0.000347867
Perovskite_band_gap_2.43	0.000347707
HTL_stack_sequence_Y3	0.00034651
ETL_additives_compounds_TiCl4	0.000345565
ETL_deposition_aggregation_state_of_reactants_Unknown	0.000344454
Perovskite_deposition_procedure_Slot-die coating	0.000344111
Substrate_stack_sequence_ Au	0.000341955
Perovskite_pl_max_772.0	0.000340047
Perovskite_deposition_thermal_annealing_temperature_65.0	0.000339357
ETL_stack_sequence_TiO2-mp	0.000336967
Perovskite_additives_concentrations_0.03	0.000336098
avg_Atomic_Radius	0.000331874
Perovskite_deposition_thermal_annealing_time_Unknown >> Unknown	0.000331565
Perovskite_additives_concentrations_3 mg/ml	0.000331307
ETL_additives_compounds_TiCl4	0.00032833
Perovskite_deposition_thermal_annealing_temperature_70.0 >> 90.0	0.000328189
Perovskite_additives_compounds_HI	0.000327171
Backcontact_stack_sequence_Cu; Cu2O	0.000324114
Perovskite_pl_max_767.0	0.000323961
Backcontact_deposition_procedure_Evaporation	0.000323747
Perovskite_composition_a_ions_Cs; FA; MA	0.000320991
HTL_stack_sequence_YC-2	0.000320047
Substrate_stack_sequence_Ti	0.00031849
ETL_stack_sequence_ SnO2-np	0.000317817
Perovskite_deposition_thermal_annealing_time_20.0 >> 30.0	0.000317757
ETL_stack_sequence_ PCBSD	0.000313671
Perovskite_deposition_solvents_DMF >> Unknown	0.000313486
ETL_deposition_procedure_Hydrothermal	0.000313419
Perovskite_deposition_thermal_annealing_time_10.0 >> 10.0	0.000313077
Perovskite_deposition_thermal_annealing_time_50.0	0.000313069
max_crystal_radius	0.000313044
ETL_deposition_procedure_ Screen printing	0.000311971
Perovskite_deposition_solvents_mixing_ratios_9; 1 >> 1	0.000311946
Perovskite_deposition_thermal_annealing_temperature_110.0 >> 105.0	0.000311938
Perovskite_additives_concentrations_0.33	0.000310703
Perovskite_additives_concentrations_0.02	0.000310562
HTL_stack_sequence_PEDOT	0.000310178
HTL_stack_sequence_PEDOT:PSS	0.000309526
HTL_additives_compounds_FK102; Li-TFSI; TBP	0.000308216
Encapsulation_stack_sequence_Unknown	0.000306973
Perovskite_deposition_solvent_annealing_solvent_atmosphere_Unknown	0.000306924
ETL_stack_sequence_ NBA-SAM	0.000306201
Perovskite_deposition_thermal_annealing_time_2.0; 10.0	0.000305207
Perovskite_deposition_thermal_annealing_temperature_100.0 >> Unknown	0.000304406
Perovskite_deposition_thermal_annealing_temperature_200.0	0.000302298
ETL_deposition_procedure_Sputtering	0.000300337
Perovskite_deposition_procedure_Electrodeposition >> CBD	0.000299078
dev_families	0.00029507
HTL_deposition_procedure_RF sputtering	0.000293922
ETL_deposition_procedure_Electrodeposition	0.000291619
ETL_stack_sequence_ TiO2-mp	0.00029112
Perovskite_band_gap_1.63	0.000291048
Perovskite_deposition_thermal_annealing_temperature_135.0	0.000290939
ETL_stack_sequence_BaSnO3-np	0.000287455
HTL_additives_compounds_Li-TFSI; SpiroTFSI2; TBP	0.000286675
Perovskite_deposition_thermal_annealing_temperature_105.0	0.000285673
ETL_deposition_procedure_Dipp-coating	0.000285179
Perovskite_deposition_solvents_mixing_ratios_6; 4	0.000285155
Perovskite_deposition_thermal_annealing_time_Unknown >> 5.0	0.000284523
Backcontact_deposition_procedure_Lamination	0.000283042
ETL_stack_sequence_ Bphen	0.000282946
Perovskite_pl_max_778.0	0.000281904
Perovskite_deposition_aggregation_state_of_reactants_Liquid >> Gas	0.000281681
ETL_stack_sequence_Fullerene-2c	0.00028134
Perovskite_deposition_thermal_annealing_temperature_Unknown >> 100	0.000281156
Perovskite_deposition_thermal_annealing_time_15.0 >> 10.0	0.00027954
ETL_stack_sequence_ ICBA	0.0002782
ETL_stack_sequence_ ZnO-np	0.000277605
Backcontact_stack_sequence_ FTO	0.000276822
Perovskite_additives_compounds_Acetate; Cl	0.000275548
ETL_deposition_thermal_annealing_temperature_ 100	0.000274025
Perovskite_deposition_thermal_annealing_time_5.0 >> 5.0	0.000273447
Perovskite_additives_concentrations_1.5 wt%	0.0002717
Perovskite_deposition_thermal_annealing_temperature_Unknown >> 160.0	0.000271562
HTL_stack_sequence_TPA-BPFN-TPA	0.000271557
ETL_stack_sequence_1-ethyl-3-methylimidazolium iodide	0.00027008
HTL_deposition_procedure_Pulsed laser deposition	0.000269866
Perovskite_additives_concentrations_0.003; 0.05	0.000269787
HTL_stack_sequence_PTB7	0.000267703
HTL_stack_sequence_NiO	0.000266578
ETL_stack_sequence_ TmPyPB	0.000266145
HTL_stack_sequence_NP1	0.000266095
Perovskite_deposition_thermal_annealing_temperature_Unknown >> 90.0	0.000265817
max_Zunger_radii_sum	0.000260846
Backcontact_deposition_procedure_Doctor blading	0.000260309
Perovskite_deposition_solvents_DMF >> none	0.000259718
dev_l_quantum_number	0.000258681
Cell_architecture_Back contacted	0.000257861
dev_valence_s	0.000256723
ETL_stack_sequence_Nb2O5	0.000255498
HTL_stack_sequence_ PEDOT:PSS	0.000255369
Perovskite_deposition_synthesis_atmosphere_Air >> Ar	0.000255212
ETL_stack_sequence_F8TBT	0.000246404
HTL_deposition_procedure_Electropolymerization	0.000245824
Perovskite_composition_perovskite_ABC3_structure_True	0.000245256
HTL_stack_sequence_YC03	0.00024407
Perovskite_deposition_thermal_annealing_atmosphere_Unknown	0.000243559
avg_group	0.000243538
Perovskite_composition_c_ions_ I	0.000243379
Perovskite_deposition_synthesis_atmosphere_Ambient	0.000242972
avg_valence_f	0.000242778
Perovskite_composition_b_ions_coefficients_ 1	0.000241464
avg_Number_of_unfilled_p_valence_electrons	0.000241407
ETL_deposition_thermal_annealing_temperature_ 500	0.00024138
HTL_stack_sequence_PTAA	0.000240994
Perovskite_deposition_thermal_annealing_time_3.0; 5.0 >> 5.0	0.00023942
HTL_deposition_reaction_solutions_concentrations_100 mg/ml	0.000239146
Perovskite_pl_max_790.0	0.000238912
ETL_stack_sequence_PCBM-60; F8TBT	0.000238629
Perovskite_additives_concentrations_5 mol%	0.000238294
dev_Number_of_unfilled_f_valence_electrons	0.000237783
Perovskite_band_gap_1.57	0.000237772
Perovskite_deposition_thermal_annealing_temperature_25.0	0.000237529
Perovskite_deposition_thermal_annealing_temperature_105	0.000236083
ETL_stack_sequence_ TiO2-nw	0.00023567
Perovskite_additives_concentrations_1 mol%	0.000233744
ETL_deposition_procedure_Unknown	0.000232038
Perovskite_composition_b_ions_Pb	0.00023148
ETL_stack_sequence_ TiO2-c	0.000230842
Perovskite_additives_compounds_H2O	0.000230292
Perovskite_deposition_thermal_annealing_time_240.0	0.000230067
Encapsulation_edge_sealing_materials_Unknown	0.000228309
ETL_deposition_solvents_ Water	0.000228091
Perovskite_pl_max_763.0	0.00022776
Perovskite_additives_compounds_PAA	0.000227637
avg_l_quantum_number	0.000227371
ETL_stack_sequence_ bis-C60	0.000227129
HTL_deposition_procedure_Unknown	0.000226445
ETL_stack_sequence_ PN4N	0.000225596
Perovskite_additives_compounds_Rb	0.000224881
dev_valence_f	0.000223787
Perovskite_additives_concentrations_0.66	0.000223734
Perovskite_deposition_procedure_Unknown	0.000223024
dev_Number_of_unfilled_s_valence_electrons	0.000222751
avg_Number_of_unfilled_s_valence_electrons	0.000222056
Module_True	0.000221388
Perovskite_deposition_solvents_acetonitrile	0.00022134
HTL_deposition_procedure_ Evaporation	0.000220619
HTL_deposition_aggregation_state_of_reactants_Unknown	0.000220254
Perovskite_deposition_thermal_annealing_temperature_210.0	0.000219789
Perovskite_deposition_synthesis_atmosphere_Ar >> Ar	0.000219079
Perovskite_deposition_thermal_annealing_time_Unknown >> 120.0	0.000218796
Perovskite_additives_concentrations_0.2	0.000218454
Perovskite_deposition_thermal_annealing_time_20.0 >> 20.0	0.000218173
Perovskite_deposition_thermal_annealing_time_5.0; 10.0	0.000217468
Perovskite_deposition_thermal_annealing_time_1.0; 2.0	0.000217275
max_Mendeleev_Number	0.000216802
ETL_stack_sequence_ZnO	0.0002167
HTL_stack_sequence_SM01	0.000216258
HTL_deposition_procedure_Evaporation	0.000214844
Perovskite_deposition_solvents_DMSO >> IPA	0.000214489
ETL_stack_sequence_PEIE	0.000214337
Perovskite_deposition_thermal_annealing_time_95.0	0.00021244
Perovskite_deposition_thermal_annealing_time_15.0 >> 120.0	0.000210286
HTL_deposition_procedure_Sputtering	0.000210196
Perovskite_composition_none_stoichiometry_components_in_excess_MACl	0.000209732
HTL_deposition_procedure_Spray-coating	0.000209667
Perovskite_composition_c_ions_coefficients_0.51; 2.49	0.000209419
Perovskite_deposition_aggregation_state_of_reactants_Gas	0.000208777
Encapsulation_stack_sequence_Epoxy	0.000208094
Perovskite_composition_perovskite_ABC3_structure_False	0.000207475
Perovskite_deposition_quenching_media_Ethyl ether	0.000206139
Perovskite_deposition_thermal_annealing_time_15.0 >> 30.0	0.000205844
Perovskite_composition_c_ions_coefficients_3	0.000205595
avg_number_of_valence_electrons	0.000204442
Perovskite_composition_c_ions_coefficients_4	0.000202437
Perovskite_deposition_thermal_annealing_temperature_70 >> 100	0.000200952
ETL_deposition_thermal_annealing_temperature_300	0.000200692
Perovskite_deposition_solvents_mixing_ratios_2; 8	0.000200355
Perovskite_band_gap_1.79	0.000199904
Perovskite_deposition_thermal_annealing_temperature_Unknown >> 25.0	0.00019971
avg_Nonmetal	0.000198222
ETL_additives_compounds_Undoped	0.000197486
HTL_deposition_procedure_Electrodeposition	0.000197123
Perovskite_band_gap_1.48	0.000196121
ETL_stack_sequence_PbI2	0.000195766
Perovskite_deposition_thermal_annealing_temperature_90.0 >> 120.0	0.000195681
HTL_stack_sequence_PTZ1	0.000193795
Perovskite_deposition_thermal_annealing_temperature_80.0 >> 60.0	0.000193638
Perovskite_deposition_thermal_annealing_time_Unknown >> 420.0	0.000193567
ETL_deposition_synthesis_atmosphere_N2	0.000193202
Perovskite_pl_max_758.0	0.000192152
ETL_stack_sequence_ SnO2-mp	0.000192112
Encapsulation_atmosphere_for_encapsulation_Unknown	0.000192053
Perovskite_pl_max_768.0	0.000191774
Perovskite_composition_short_form_MAPbBrI	0.000191527
Perovskite_deposition_thermal_annealing_time_3.0	0.000190977
HTL_deposition_reaction_solutions_compounds_Li-TFSI; Spiro-MeOTAD; TBP	0.000190954
Substrate_stack_sequence_ Ag-nw	0.000190794
Perovskite_deposition_thermal_annealing_temperature_85.0	0.000189939
ETL_stack_sequence_PTTI-2	0.000189558
ETL_stack_sequence_ Al2O3-c	0.000189107
Perovskite_deposition_thermal_annealing_time_1.0; 10.0	0.000188991
Perovskite_additives_compounds_Cd	0.000188959
avg_valence_p	0.000188592
Perovskite_deposition_thermal_annealing_temperature_180.0 >> 180.0	0.000188268
Perovskite_additives_compounds_SrI2	0.000188236
HTL_stack_sequence_VB-MeO-FDPA	0.000188098
Perovskite_deposition_thermal_annealing_time_0.0	0.000187969
Perovskite_composition_c_ions_coefficients_0.45; 2.55	0.000187855
Perovskite_additives_concentrations_0.15	0.000187628
ETL_deposition_thermal_annealing_temperature_Unknown	0.000187427
Perovskite_deposition_quenching_media_Methyl acetate	0.000187226
Perovskite_deposition_quenching_media_Methanol	0.000186418
range_Mulliken_EN	0.000185881
HTL_stack_sequence_MoS2	0.000185662
HTL_stack_sequence_SGT-420	0.000185653
Perovskite_deposition_after_treatment_of_formed_perovskite_Intense pulsed light annealing	0.000185613
ETL_deposition_procedure_ CBD	0.000184843
HTL_additives_concentrations_20 uL(517mg/mLACN); 36 uL; 8 uL(376mg/mLACN)	0.00018349
ETL_stack_sequence_ Sr2CeO4:Eu	0.000182333
Perovskite_deposition_procedure_Spin-coating >> Gas reaction	0.000181929
Perovskite_deposition_solvents_DMSO >> none	0.000181832
Perovskite_deposition_quenching_media_Flash infrared annealling	0.000181428
ETL_deposition_procedure_Reactive sputtering	0.000181208
ETL_deposition_procedure_Spray-coating	0.000181207
Perovskite_deposition_number_of_deposition_steps_3	0.00018072
Perovskite_deposition_solvents_DMF; THF	0.000180322
Module_False	0.000180219
Backcontact_stack_sequence_Cr	0.000179416
Perovskite_deposition_solvent_annealing_solvent_atmosphere_DMF	0.00017892
Perovskite_composition_b_ions_Pb; Sn	0.000178815
Backcontact_deposition_procedure_ Sandwiching	0.000178491
HTL_stack_sequence_A101	0.000177437
HTL_additives_compounds_LiN(CF3SO2)2N; TBP	0.000177265
Perovskite_deposition_thermal_annealing_time_0.5	0.000177219
Perovskite_additives_compounds_MEH-PPV; TBP	0.000177183
Perovskite_deposition_thermal_annealing_temperature_50; 100	0.000176772
avg_gilmor_number_of_valence_electron	0.0001767
Perovskite_composition_a_ions_coefficients_0.1; 0.765; 0.135	0.000175332
Perovskite_additives_compounds_CaCl2	0.000174901
ETL_additives_compounds_Urea	0.000174757
ETL_stack_sequence_ PEIE	0.0001747
ETL_stack_sequence_BCP	0.000174681
Perovskite_deposition_thermal_annealing_time_9.0	0.000173793
Perovskite_composition_c_ions_coefficients_0.5; 2.5	0.000173472
HTL_stack_sequence_P:OO	0.00017225
Perovskite_deposition_quenching_media_Vacuum	0.000172151
Perovskite_composition_a_ions_coefficients_0.05; 0.8; 0.15	0.000171799
Encapsulation_atmosphere_for_encapsulation_N2	0.000171777
Perovskite_additives_concentrations_0.5	0.000171384
HTL_stack_sequence_P-R	0.000171064
Perovskite_deposition_synthesis_atmosphere_N2 >> MAI	0.000170316
Perovskite_band_gap_1.52	0.00016979
avg_valence_s	0.000169578
Perovskite_additives_concentrations_0.3	0.000169003
ETL_stack_sequence_PCBM-70	0.000168512
Substrate_stack_sequence_ AZO	0.000167569
range_Atomic_Weight	0.000166311
Perovskite_pl_max_785.0	0.00016605
Perovskite_additives_compounds_KI	0.000164398
Perovskite_band_gap_1.526	0.00016294
Module_number_of_cells_in_module_0	0.00016228
Perovskite_deposition_solvents_mixing_ratios_5; 1	0.000161908
Perovskite_deposition_procedure_Doctor blading	0.000161287
Perovskite_additives_concentrations_0.01; nan	0.000161168
Substrate_stack_sequence_ Ag	0.000160764
ETL_stack_sequence_CeOx-np	0.000160726
HTL_additives_compounds_Cu	0.000160553
Perovskite_deposition_solvents_mixing_ratios_4; 5	0.000160465
ETL_stack_sequence_Ca	0.000159702
ETL_deposition_procedure_CBD	0.000159665
HTL_deposition_thermal_annealing_atmosphere_N2	0.000158865
Perovskite_deposition_thermal_annealing_temperature_Unknown >> 80.0	0.000158687
ETL_stack_sequence_PCBM-60; TDPP-CN4	0.000158621
Perovskite_pl_max_716.0	0.000158355
ETL_stack_sequence_P4	0.000158263
Perovskite_band_gap_2.32	0.000158166
HTL_stack_sequence_RCP	0.000157861
Perovskite_additives_compounds_CaI2	0.000157421
Perovskite_deposition_thermal_annealing_temperature_60; 110	0.000157398
HTL_stack_sequence_TTBCPE	0.000157186
Perovskite_deposition_solvents_mixing_ratios_1000; 95	0.000156989
ETL_stack_sequence_ TiBaO-nanosphere	0.00015678
ETL_stack_sequence_ TiO2-nanofibers	0.000156325
Perovskite_composition_none_stoichiometry_components_in_excess_Pb	0.00015536
Perovskite_band_gap_1.65	0.000154918
Perovskite_band_gap_1.645	0.000154898
Perovskite_deposition_thermal_annealing_temperature_70; 100	0.000154506
Encapsulation_edge_sealing_materials_Epoxy	0.000154442
Perovskite_additives_compounds_1-hexyl-3-methylimidazoliumchloride	0.000154363
Perovskite_additives_compounds_PEAI	0.000152963
ETL_stack_sequence_SnO2-np	0.000152438
Perovskite_pl_max_810.0	0.000152285
ETL_stack_sequence_ TiO2-c	0.000152006
HTL_stack_sequence_P2	0.000151791
HTL_stack_sequence_Ph-TPM	0.0001517
ETL_stack_sequence_ Zr(acac)4	0.000151569
HTL_additives_compounds_FK209; Li-TFSI	0.000151308
HTL_deposition_procedure_Doctor blading	0.000150933
HTL_deposition_reaction_solutions_compounds_Oleylamine	0.000150692
Perovskite_deposition_thermal_annealing_time_Unknown >> 70.0	0.000150267
ETL_deposition_procedure_Slot-die coating	0.000150196
Perovskite_deposition_thermal_annealing_temperature_75.0 >> 75.0	0.000149478
ETL_deposition_procedure_RF sputtering	0.000149109
Backcontact_stack_sequence_PEDOT:PSS	0.000149012
Perovskite_deposition_synthesis_atmosphere_Ambient >> Ambient	0.000148744
Perovskite_deposition_thermal_annealing_temperature_60	0.000148637
Perovskite_deposition_solvents_mixing_ratios_100; 13	0.000148596
HTL_stack_sequence_WO3-nw	0.000148417
Perovskite_deposition_thermal_annealing_time_3.0 >> 30.0	0.000148102
Perovskite_band_gap_1.73	0.000147732
Perovskite_deposition_thermal_annealing_temperature_65.0; 100.0	0.000146448
Perovskite_additives_concentrations_1000 ppm	0.000146301
Perovskite_additives_compounds_H2PO3	0.000145775
HTL_stack_sequence_TFB	0.000145535
Perovskite_additives_compounds_xDMAI	0.000145155
range_Atomic_Number	0.000144462
Perovskite_additives_compounds_Acetate	0.000144261
Perovskite_pl_max_782.0	0.000144221
Perovskite_additives_compounds_Melanin	0.000144217
Perovskite_deposition_solvents_none	0.000144016
Perovskite_pl_max_750.0	0.000142948
Perovskite_deposition_thermal_annealing_time_30.0 >> 15.0	0.000142574
Perovskite_deposition_thermal_annealing_temperature_150	0.000142547
Perovskite_deposition_thermal_annealing_time_10.0 >> 120.0	0.000142509
ETL_deposition_procedure_ ALD	0.000142451
HTL_stack_sequence_P:ON	0.00014242
Perovskite_additives_compounds_Bi	0.000142327
Perovskite_deposition_thermal_annealing_temperature_120	0.000142267
Perovskite_pl_max_776.0	0.000141969
Perovskite_deposition_solvents_mixing_ratios_12.5; 1 >> 3; 1	0.000141911
Perovskite_deposition_synthesis_atmosphere_Vacuum	0.000141887
HTL_stack_sequence_Au-nw	0.000140552
Perovskite_deposition_thermal_annealing_temperature_60.0	0.000140164
Perovskite_deposition_thermal_annealing_temperature_80 >> 80	0.000139914
ETL_stack_sequence_TiO2-nw	0.000139664
Perovskite_pl_max_745.0	0.000139434
Perovskite_composition_none_stoichiometry_components_in_excess_Stoichiometric	0.000139347
Perovskite_composition_none_stoichiometry_components_in_excess_PbI2; PbBr2	0.000138446
Perovskite_deposition_aggregation_state_of_reactants_Gas >> Liquid	0.00013839
Backcontact_deposition_procedure_Screen printing	0.000137964
ETL_additives_compounds_Ga	0.000137806
Perovskite_deposition_thermal_annealing_temperature_125.0	0.000136975
Perovskite_deposition_solvents_mixing_ratios_4; 6	0.000136666
Module_JV_data_recalculated_per_cell_False	0.000136248
ETL_deposition_thermal_annealing_time_Unknown	0.000135886
ETL_deposition_procedure_ CBD	0.000135765
Perovskite_deposition_thermal_annealing_temperature_60; 100	0.000135225
HTL_additives_compounds_ Unknown	0.000134904
HTL_stack_sequence_KM03	0.000134791
ETL_stack_sequence_ZnS	0.000134469
ETL_stack_sequence_ ZrO2-c	0.000134177
HTL_stack_sequence_ TaTm	0.000134168
Perovskite_deposition_solvents_acetonitrile; Methylamine	0.000134132
Perovskite_deposition_solvents_DMF >> DMF; IPA	0.000133359
HTL_stack_sequence_NiO-c	0.000133114
Perovskite_deposition_aggregation_state_of_reactants_Liquid >> Unknown	0.000132517
Perovskite_deposition_procedure_Co-evaporation	0.000132422
Perovskite_deposition_thermal_annealing_time_60.0 >> 60.0	0.000132344
Perovskite_pl_max_773.0	0.000132145
Perovskite_composition_a_ions_coefficients_0.05; 0.81; 0.14	0.000132139
Perovskite_deposition_solvents_mixing_ratios_nan >> 1	0.000131464
Perovskite_deposition_solvents_mixing_ratios_8; 1 >> 1	0.00013067
Perovskite_deposition_thermal_annealing_temperature_150; 100 >> 100	0.000130648
HTL_stack_sequence_MeO-TPD	0.000130636
Perovskite_deposition_thermal_annealing_temperature_70	0.000130397
Perovskite_additives_concentrations_0.005	0.000130208
HTL_deposition_thermal_annealing_temperature_Unknown	0.000129717
HTL_stack_sequence_P1	0.000129641
Perovskite_composition_c_ions_coefficients_0.50; 2.50	0.000129205
Backcontact_stack_sequence_Ag-nw	0.000129158
Perovskite_pl_max_764.0	0.000128836
HTL_deposition_procedure_Slot-die coating	0.000128503
Perovskite_pl_max_800.0	0.000128003
Perovskite_additives_compounds_PTMA-H; Rb	0.000127997
Perovskite_pl_max_777.0	0.000127657
Perovskite_deposition_aggregation_state_of_reactants_Gas >> Gas	0.000127011
ETL_deposition_procedure_Inkjet printing	0.000126836
ETL_stack_sequence_ NaYF4:Yb:Tm-np	0.000126401
Perovskite_composition_b_ions_coefficients_2	0.000126392
Perovskite_deposition_thermal_annealing_temperature_90	0.000125769
Encapsulation_edge_sealing_materials_UV-curable epoxy	0.000125614
ETL_deposition_procedure_ Dipp-coating	0.0001248
Perovskite_deposition_thermal_annealing_temperature_350	0.000124539
Perovskite_deposition_thermal_annealing_temperature_140.0	0.000124507
ETL_stack_sequence_ BMIM-OTF	0.000124299
Perovskite_deposition_solvents_DMF; DMSO >> Ethanol	0.000124032
Perovskite_deposition_thermal_annealing_temperature_160.0	0.00012372
ETL_additives_compounds_DMOAP	0.000123261
Perovskite_deposition_thermal_annealing_time_13.0	0.000123069
Perovskite_deposition_synthesis_atmosphere_Air >> N2	0.000122984
Perovskite_band_gap_1.62	0.000122853
HTL_deposition_procedure_Electrospraying	0.000122649
Perovskite_additives_concentrations_0.06	0.000122577
ETL_deposition_synthesis_atmosphere_Unknown	0.000122433
Backcontact_deposition_procedure_Sandwiching	0.00012225
HTL_deposition_aggregation_state_of_reactants_Liquid	0.000122122
Perovskite_deposition_solvents_mixing_ratios_1 >> 5; 5	0.000122008
ETL_stack_sequence_ PEI	0.000121954
Perovskite_deposition_solvents_mixing_ratios_4; 1 >> 1	0.0001218
avg_Metal	0.000121256
Encapsulation_stack_sequence_Field's metal	0.000120791
HTL_stack_sequence_po-TPE-4DPA	0.000120584
Perovskite_deposition_after_treatment_of_formed_perovskite_IR radiation	0.000120136
Perovskite_composition_a_ions_coefficients_0.05; 0.7917; 0.1583	0.00012009
dev_Metal	0.00011975
Perovskite_deposition_thermal_annealing_time_10.0 >> 30.0	0.000119686
ETL_stack_sequence_CeOx	0.000119636
ETL_stack_sequence_ TiO2	0.000119042
HTL_stack_sequence_TPD	0.00011903
Perovskite_deposition_thermal_annealing_time_120.0 >> 60.0	0.000119009
Module_JV_data_recalculated_per_cell_True	0.000118889
HTL_stack_sequence_CuPc	0.000118886
ETL_deposition_solvents_Unknown	0.00011827
ETL_stack_sequence_ Rhodamine 101	0.000118021
Perovskite_additives_concentrations_1	0.000117914
Perovskite_deposition_solvents_mixing_ratios_12.5; 1 >> 1	0.000117809
Perovskite_deposition_quenching_media_Anisole; Chlorobenzene	0.000117692
Perovskite_pl_max_788.0	0.000117613
ETL_stack_sequence_2PDI-2S	0.000117541
Backcontact_stack_sequence_PEDOT:PSS	0.000117248
Perovskite_storage_time_until_next_deposition_step_Unknown	0.0001169
HTL_stack_sequence_ PSS-Na	0.000116473
HTL_stack_sequence_HTM2	0.000116293
Perovskite_deposition_thermal_annealing_time_8.0	0.000115841
Perovskite_composition_c_ions_coefficients_0.15; 2.85	0.000115502
Perovskite_deposition_procedure_Spin-coating >> Ion exchange	0.000115214
Perovskite_band_gap_1.4	0.000115199
Perovskite_composition_short_form_CsFAMAPbI	0.000115153
ETL_stack_sequence_TIPD; ZnO-np	0.000114834
Perovskite_additives_compounds_NH4SCN	0.000114669
Perovskite_deposition_thermal_annealing_temperature_70.0 >> 150.0	0.000114597
Backcontact_stack_sequence_AZO	0.000114529
HTL_stack_sequence_P-OR	0.00011399
Perovskite_deposition_thermal_annealing_time_600.0	0.000113648
Perovskite_deposition_solvents_DMF >> IPA >> none	0.000113321
Perovskite_additives_concentrations_0.028; 0.0003	0.000113215
Perovskite_deposition_synthesis_atmosphere_N2 >> MAI; Vacuum	0.000112994
Perovskite_deposition_thermal_annealing_time_50.0 >> 50.0	0.000112714
ETL_surface_treatment_before_next_deposition_step_UV	0.000112414
HTL_additives_compounds_Co-TFSI; TBP	0.000112278
Perovskite_additives_compounds_Cl; NH4Br	0.000112122
Perovskite_deposition_solvents_DMF; NMP	0.000112001
ETL_stack_sequence_Black P-QDs	0.000111728
Perovskite_composition_c_ions_coefficients_0.095; 0.905	0.000111508
Perovskite_pl_max_762.0	0.000111018
ETL_deposition_procedure_ CVD	0.000110813
Perovskite_composition_c_ions_coefficients_0.43; 2.57	0.000110591
Perovskite_deposition_thermal_annealing_temperature_35.0	0.000110561
Perovskite_dimension_3D_False	0.000110224
HTL_stack_sequence_PANI:PSS	0.000110218
Perovskite_deposition_synthesis_atmosphere_Vacuum >> Air	0.000110036
Perovskite_deposition_thermal_annealing_time_15.0 >> 0.0	0.000109929
Perovskite_deposition_solvents_mixing_ratios_1; 2	0.000109649
Perovskite_composition_a_ions_coefficients_2	0.000109556
Perovskite_composition_a_ions_coefficients_2; 3	0.000109494
Perovskite_additives_compounds_NH4Cl	0.000109186
HTL_stack_sequence_SAF-5	0.000109143
Backcontact_deposition_solvents_Unknown	0.000109083
Perovskite_additives_compounds_NH4Cl; NH4SCN	0.000109007
Perovskite_deposition_thermal_annealing_temperature_100.0 >> 150.0	0.000108985
dev_Nonmetal	0.000108931
Perovskite_additives_concentrations_0.001	0.0001089
ETL_additives_compounds_CTAB	0.000108887
Perovskite_pl_max_769.0	0.00010853
ETL_additives_compounds_nan	0.000108505
Substrate_stack_sequence_ Ag-nw; Graphene oxide	0.000108152
Perovskite_deposition_thermal_annealing_time_30.0 >> 120.0	0.00010808
HTL_stack_sequence_PolyTPD	0.000107109
Perovskite_deposition_thermal_annealing_temperature_350.0	0.000106862
Perovskite_deposition_thermal_annealing_time_25.0	0.000106846
Perovskite_deposition_solvents_DMF >> Chlorobenzene; IPA	0.000106463
ETL_deposition_procedure_Dipp-coating	0.00010646
max_Mulliken_EN	0.000106033
Perovskite_deposition_quenching_media_mixing_ratios_9; 1	0.000105958
HTL_stack_sequence_PbS	0.000105955
ETL_stack_sequence_ PCBM-60	0.000105947
ETL_deposition_procedure_E-beam evaporation	0.000105563
HTL_stack_sequence_BuO-DATPA	0.000105483
Perovskite_deposition_solvents_DMSO >> Methanol	0.00010533
ETL_deposition_procedure_E-beam evaporation	0.000104562
Perovskite_deposition_solvents_DMF; DMSO >> Ethanol; IPA	0.000104301
HTL_stack_sequence_PFBT-Na	0.000104262
Perovskite_deposition_thermal_annealing_time_15.0 >> 15.0	0.000104006
Perovskite_deposition_thermal_annealing_time_Unknown >> Unknown >> 60.0	0.000103301
Perovskite_deposition_synthesis_atmosphere_N2 >> N2 >> N2	0.00010325
Perovskite_deposition_solvents_mixing_ratios_1; 9	0.000103247
Perovskite_deposition_aggregation_state_of_reactants_Liquid >> Liquid >> Liquid	0.000103105
Perovskite_deposition_thermal_annealing_time_30.0 >> 60.0	0.000102411
Perovskite_deposition_thermal_annealing_temperature_Unknown >> 105.0	0.000102377
ETL_stack_sequence_ ZnO	0.000102221
Perovskite_pl_max_786.0	0.000102121
Perovskite_deposition_solvents_mixing_ratios_2; 1 >> 1	0.000101897
HTL_stack_sequence_PCA-2	0.000101891
Perovskite_band_gap_1.54	0.000101601
Perovskite_deposition_solvents_DMF; DMSO >> H2O; IPA	0.000101593
Backcontact_stack_sequence_MoOx	0.000101479
ETL_deposition_thermal_annealing_time_ 60.0	0.000101253
HTL_surface_treatment_before_next_deposition_step_Plasma	0.000101106
HTL_deposition_procedure_Dipp-coating	0.000100992
HTL_deposition_solvents_Unknown	0.000100683
Perovskite_deposition_thermal_annealing_time_10.0 >> Unknown	0.00010064
mode_heat_atomization(kJ/mol)	0.000100631
Perovskite_additives_compounds_Ba	0.000100551
ETL_surface_treatment_before_next_deposition_step_H2	0.000100253
Perovskite_deposition_thermal_annealing_temperature_50.0	9.99785e-05
ETL_deposition_procedure_Magnetron sputtering	9.99699e-05
Perovskite_composition_a_ions_coefficients_0.5; 0.5	9.99402e-05
Perovskite_deposition_thermal_annealing_time_3.0 >> Unknown	9.99358e-05
ETL_stack_sequence_ Alq3	9.96341e-05
Perovskite_band_gap_1.26	9.94485e-05
Perovskite_deposition_solvents_none >> IPA	9.93841e-05
Perovskite_deposition_aggregation_state_of_reactants_Unknown	9.93242e-05
ETL_stack_sequence_ PbSe	9.91418e-05
ETL_stack_sequence_ ZrO2-mp	9.90348e-05
Perovskite_deposition_solvent_annealing_solvent_atmosphere_DMSO	9.89667e-05
Perovskite_pl_max_771.0	9.89488e-05
Backcontact_stack_sequence_Ca	9.87831e-05
Substrate_stack_sequence_ IZO	9.8691e-05
ETL_stack_sequence_ WO3	9.86625e-05
ETL_stack_sequence_F-PDI	9.84218e-05
HTL_stack_sequence_M:ON	9.83812e-05
Perovskite_pl_max_761.0	9.82281e-05
HTL_additives_compounds_TS-CuPc	9.80994e-05
ETL_stack_sequence_ MoOx	9.80661e-05
HTL_stack_sequence_BTF2	9.78282e-05
Perovskite_additives_compounds_Cl; NiO-np	9.77976e-05
Perovskite_deposition_solvents_Ethanol; H2O >> IPA	9.75166e-05
HTL_additives_compounds_TPFB	9.70002e-05
ETL_stack_sequence_PCBM-70	9.69668e-05
Perovskite_composition_b_ions_coefficients_0.5; 0.5	9.66276e-05
Perovskite_deposition_solvents_mixing_ratios_15; 2	9.63651e-05
Perovskite_deposition_thermal_annealing_time_150.0	9.63584e-05
HTL_deposition_synthesis_atmosphere_Unknown	9.63441e-05
Perovskite_deposition_solvents_mixing_ratios_9; 1 >> 5; 95	9.62322e-05
Backcontact_deposition_aggregation_state_of_reactants_Gas	9.6203e-05
Substrate_deposition_procedure_Unknown	9.60372e-05
Perovskite_pl_max_766.0	9.59968e-05
Perovskite_additives_compounds_Carbon-nt; P3HT	9.59743e-05
HTL_stack_sequence_3EGO-PPV	9.5954e-05
Perovskite_additives_compounds_SnF2	9.57046e-05
Perovskite_additives_concentrations_2.5 wt%; 3 wt%	9.55158e-05
ETL_stack_sequence_ SnO2-c	9.53832e-05
Perovskite_deposition_thermal_annealing_temperature_Unknown >> 110.0	9.51488e-05
ETL_stack_sequence_CMB	9.50612e-05
Substrate_stack_sequence_SLG	9.48859e-05
Perovskite_deposition_thermal_annealing_time_90.0; 10.0	9.47951e-05
HTL_stack_sequence_ZnPc(tBu)4	9.46688e-05
Perovskite_deposition_thermal_annealing_time_6.0; 10.0	9.43323e-05
Perovskite_deposition_thermal_annealing_time_30.0; 90.0	9.42054e-05
Perovskite_deposition_thermal_annealing_temperature_80	9.41986e-05
Backcontact_stack_sequence_ FTO	9.4066e-05
HTL_stack_sequence_TPB(2-TPTZ)	9.38753e-05
HTL_deposition_procedure_Dropcasting	9.36282e-05
ETL_stack_sequence_WO3-np	9.3194e-05
Perovskite_deposition_solvents_mixing_ratios_7; 1	9.28336e-05
Perovskite_deposition_thermal_annealing_time_20.0 >> 15.0	9.27462e-05
HTL_additives_compounds_Sc3N@C80	9.22981e-05
HTL_stack_sequence_WO3	9.20433e-05
Perovskite_dimension_3D_True	9.19625e-05
Perovskite_composition_a_ions_coefficients_0.05; 0.79; 0.16	9.18041e-05
Perovskite_additives_compounds_PTAA	9.15502e-05
HTL_stack_sequence_SDTFCz2	9.1543e-05
Perovskite_deposition_thermal_annealing_time_Unknown >> 45.0	9.15188e-05
Perovskite_deposition_solvents_mixing_ratios_1 >> 1 >> 1	9.13511e-05
HTL_stack_sequence_SWCNTs	9.12067e-05
ETL_deposition_thermal_annealing_atmosphere_Unknown	9.10574e-05
Module_area_total_25.0	9.09163e-05
Perovskite_deposition_thermal_annealing_time_10.0 >> 60.0	9.06786e-05
Perovskite_deposition_thermal_annealing_temperature_Unknown >> 60	9.063e-05
Backcontact_deposition_procedure_Magnetron sputtering	9.04803e-05
ETL_additives_concentrations_1	9.034e-05
HTL_stack_sequence_TaTm	8.99149e-05
HTL_stack_sequence_TATCz3	8.98198e-05
ETL_deposition_procedure_ Spray-pyrolys	8.98118e-05
Perovskite_additives_compounds_Urea	8.97919e-05
Perovskite_deposition_thermal_annealing_time_0.066	8.97404e-05
Backcontact_stack_sequence_ MoO3	8.96939e-05
Perovskite_additives_concentrations_0.04	8.95272e-05
Perovskite_composition_short_form_CsFAMAPbBrI	8.92426e-05
Perovskite_composition_a_ions_coefficients_0.75; 0.25	8.90725e-05
Perovskite_composition_c_ions_coefficients_0.49; 2.51	8.90563e-05
Perovskite_deposition_reaction_solutions_compounds_C3H5CsO2; HPbBr3; HPbI3	8.89754e-05
ETL_stack_sequence_ PFN	8.89744e-05
Add_lay_front_False	8.89074e-05
Perovskite_deposition_solvents_mixing_ratios_1; 1 >> 1	8.88823e-05
HTL_stack_sequence_Py-C	8.88699e-05
Perovskite_additives_concentrations_200 mol%	8.86595e-05
Perovskite_deposition_thermal_annealing_temperature_25; 75 >> 135	8.86543e-05
HTL_stack_sequence_2EGO-PPV	8.84257e-05
ETL_stack_sequence_Ti3C2	8.8407e-05
Perovskite_deposition_thermal_annealing_temperature_70 >> 70	8.81782e-05
Backcontact_stack_sequence_ Au	8.77298e-05
Substrate_stack_sequence_ AZO	8.7703e-05
HTL_stack_sequence_TT80	8.76953e-05
ETL_stack_sequence_CeO2-c	8.76767e-05
ETL_stack_sequence_ DTAB	8.75868e-05
Perovskite_additives_compounds_Hydrazine	8.74085e-05
Perovskite_deposition_procedure_Dropcasting	8.72822e-05
Perovskite_additives_concentrations_0.071	8.71451e-05
Perovskite_deposition_thermal_annealing_temperature_90.0 >> 90.0	8.69386e-05
Perovskite_deposition_solvents_mixing_ratios_2; 1	8.69304e-05
Perovskite_additives_compounds_SCN	8.67929e-05
Backcontact_deposition_procedure_ Evaporation	8.66732e-05
HTL_deposition_procedure_Reactive magnetron sputtering	8.65491e-05
Perovskite_deposition_synthesis_atmosphere_Vacuum >> N2	8.64935e-05
Backcontact_stack_sequence_Graphite	8.58597e-05
HTL_deposition_procedure_Magnetron sputtering	8.58432e-05
HTL_deposition_procedure_E-beam evaporation	8.58269e-05
HTL_stack_sequence_MoO3	8.55603e-05
Perovskite_deposition_after_treatment_of_formed_perovskite_Degradation in air under AM 1.5	8.54101e-05
Perovskite_pl_max_825.0	8.53808e-05
Perovskite_deposition_thermal_annealing_time_30.0 >> 5.0	8.53311e-05
HTL_stack_sequence_PCDTBT	8.52695e-05
Perovskite_deposition_thermal_annealing_temperature_340	8.5246e-05
Perovskite_deposition_solvents_mixing_ratios_3; 7; 0.5	8.52264e-05
Backcontact_deposition_procedure_Unknown	8.49811e-05
Perovskite_deposition_thermal_annealing_time_12.0	8.47452e-05
HTL_additives_compounds_Urea	8.43642e-05
Perovskite_deposition_thermal_annealing_temperature_20.0	8.42371e-05
Perovskite_deposition_thermal_annealing_time_10.0; 10.0 >> 5.0	8.40815e-05
Perovskite_deposition_thermal_annealing_temperature_40.0	8.40371e-05
Perovskite_deposition_after_treatment_of_formed_perovskite_Washed with Ether	8.40294e-05
range_Gordy_electonegativity	8.39613e-05
Perovskite_deposition_thermal_annealing_time_Unknown >> 3.0	8.3792e-05
Perovskite_deposition_thermal_annealing_time_15.0; 15.0 >> 15.0	8.37096e-05
Perovskite_deposition_solvents_mixing_ratios_8; 1	8.36361e-05
Perovskite_deposition_thermal_annealing_temperature_Unknown >> 70	8.35778e-05
Perovskite_pl_max_781.0	8.34009e-05
HTL_additives_compounds_ Li-TFSI; TBP	8.31694e-05
Perovskite_deposition_thermal_annealing_time_5.0 >> 30.0	8.28827e-05
Add_lay_front_True	8.28593e-05
Perovskite_deposition_solvents_mixing_ratios_19; 1 >> 1	8.28564e-05
Perovskite_deposition_solvents_DMF; DMSO >> none	8.20294e-05
Perovskite_deposition_solvents_DMF >> Ethanol	8.17796e-05
Perovskite_deposition_thermal_annealing_temperature_90 >> Unknown	8.16736e-05
HTL_deposition_thermal_annealing_time_Unknown	8.12437e-05
Perovskite_deposition_quenching_media_Trifluorotoluene	8.12136e-05
Perovskite_dimension_2D_True	8.10601e-05
Perovskite_deposition_synthesis_atmosphere_relative_humidity_50	8.10362e-05
Perovskite_additives_compounds_IPA HCl	8.1011e-05
Perovskite_deposition_thermal_annealing_time_10.0; 10.0	8.08088e-05
Perovskite_additives_compounds_HBr	8.03473e-05
HTL_additives_compounds_Cu(TFSI)2	8.02679e-05
Perovskite_deposition_thermal_annealing_temperature_75.0 >> 100.0	8.02611e-05
HTL_stack_sequence_TBC-3	8.00074e-05
Perovskite_deposition_thermal_annealing_time_0.1	7.98007e-05
ETL_stack_sequence_SrTiO3	7.95182e-05
Substrate_stack_sequence_ Graphene	7.9497e-05
ETL_stack_sequence_TiS2	7.94446e-05
Perovskite_additives_compounds_TFBA	7.93123e-05
ETL_additives_compounds_ Al	7.92153e-05
Perovskite_deposition_thermal_annealing_time_300.0	7.89781e-05
Perovskite_deposition_quenching_media_Ar	7.89656e-05
ETL_stack_sequence_ Au	7.89546e-05
Perovskite_additives_compounds_TBP	7.87658e-05
Perovskite_deposition_thermal_annealing_time_80.0	7.84448e-05
HTL_stack_sequence_FT73	7.80276e-05
Perovskite_additives_concentrations_2 mol%	7.78859e-05
HTL_deposition_procedure_Screen printing	7.77666e-05
Perovskite_composition_b_ions_coefficients_1	7.76952e-05
Perovskite_deposition_solvents_none >> none	7.7628e-05
Perovskite_deposition_thermal_annealing_temperature_200	7.75525e-05
Perovskite_deposition_thermal_annealing_time_2.0 >> 30.0	7.72978e-05
ETL_stack_sequence_P(NDI2OD-TET)	7.72795e-05
Perovskite_deposition_thermal_annealing_temperature_40; 100	7.72377e-05
HTL_stack_sequence_CuIn1.5Se3-QDs	7.71004e-05
Perovskite_additives_compounds_CuI2	7.70285e-05
HTL_stack_sequence_CuO	7.68521e-05
HTL_additives_compounds_Mo(tfd-COCF3)3	7.68468e-05
ETL_stack_sequence_Graphene; NDI; SnO2-np	7.68449e-05
HTL_additives_compounds_Li-TFSI; Polystyrene; TBP	7.68439e-05
Perovskite_additives_concentrations_0.0008	7.66178e-05
Perovskite_composition_short_form_FAMAPbBrI	7.6584e-05
Perovskite_dimension_list_of_layers_2.0	7.64671e-05
Perovskite_deposition_thermal_annealing_temperature_400.0	7.61706e-05
Perovskite_additives_compounds_Ag; Cl; rGO	7.61612e-05
ETL_deposition_thermal_annealing_temperature_400	7.59974e-05
Perovskite_additives_concentrations_3 wt%	7.59407e-05
Perovskite_deposition_solvents_mixing_ratios_2; 8; 1	7.58198e-05
ETL_deposition_procedure_ Spin-coating >> CBD	7.56328e-05
Perovskite_additives_compounds_Acetate; H2O	7.55966e-05
Perovskite_band_gap_1.613	7.55112e-05
Perovskite_deposition_quenching_media_IPA	7.54468e-05
HTL_additives_compounds_I2	7.54242e-05
Perovskite_deposition_synthesis_atmosphere_relative_humidity_65	7.53754e-05
Perovskite_additives_concentrations_0.75	7.5201e-05
ETL_deposition_procedure_Electrodeposition	7.49834e-05
HTL_deposition_procedure_ALD	7.48607e-05
Encapsulation_stack_sequence_SLG; UV-selant	7.45616e-05
HTL_stack_sequence_PMMA; rGO	7.45272e-05
Perovskite_deposition_solvents_mixing_ratios_17; 3 >> 5; 95	7.45077e-05
ETL_stack_sequence_ Ag-np	7.43314e-05
ETL_stack_sequence_HAT-CN	7.43186e-05
Perovskite_deposition_thermal_annealing_time_1.0; 5.0	7.41994e-05
Perovskite_deposition_thermal_annealing_time_75.0	7.41386e-05
HTL_deposition_solvents_Chlorobenzene	7.41118e-05
HTL_stack_sequence_Graphene oxide	7.39913e-05
ETL_stack_sequence_ Al2O3-mp	7.39205e-05
Perovskite_deposition_solvents_DMF; DMSO; GBL; NMP	7.38089e-05
Backcontact_deposition_solvents_none	7.38028e-05
Perovskite_additives_compounds_NaI	7.37352e-05
Perovskite_deposition_thermal_annealing_time_3.0 >> 10.0	7.34829e-05
Perovskite_additives_compounds_Sr	7.34191e-05
HTL_stack_sequence_PF8-TAA	7.29166e-05
HTL_stack_sequence_CuS	7.29045e-05
ETL_stack_sequence_FPI-PEIE	7.26363e-05
HTL_stack_sequence_COPV6	7.2627e-05
HTL_stack_sequence_2FBTA-1	7.2538e-05
Perovskite_pl_max_805.0	7.21115e-05
Substrate_deposition_procedure_Commercial	7.21042e-05
HTL_stack_sequence_ NPB	7.20586e-05
HTL_stack_sequence_TT0	7.18606e-05
Perovskite_deposition_thermal_annealing_time_1.0 >> 30.0	7.1826e-05
ETL_stack_sequence_Poly-EDOT-C60	7.14895e-05
Module_number_of_cells_in_module_5	7.14205e-05
Perovskite_composition_a_ions_coefficients_0.83; 0.17	7.13969e-05
Perovskite_additives_compounds_CsAc	7.13807e-05
Perovskite_deposition_solvents_mixing_ratios_10; 1	7.13351e-05
HTL_stack_sequence_VOx	7.12929e-05
Perovskite_deposition_thermal_annealing_temperature_Unknown >> Unknown	7.12237e-05
ETL_stack_sequence_ TiO2-nanofibres	7.10469e-05
Perovskite_deposition_thermal_annealing_time_Unknown >> 40.0	7.10067e-05
HTL_stack_sequence_SGT-422	7.0988e-05
HTL_stack_sequence_ MoO3	7.09763e-05
mode_Zunger_radii_sum	7.09609e-05
Perovskite_pl_max_746.0	7.08932e-05
Perovskite_deposition_thermal_annealing_time_1.5; 2.0	7.07787e-05
Perovskite_composition_a_ions_coefficients_0.15; 0.85	7.06381e-05
ETL_deposition_procedure_RF sputtering	7.0585e-05
Perovskite_composition_a_ions_FA	7.0581e-05
Perovskite_deposition_thermal_annealing_temperature_170; 100	7.0528e-05
HTL_stack_sequence_P3TAA-co-P3HT	7.04187e-05
Perovskite_deposition_solvents_mixing_ratios_33; 28; 33; 5	7.02493e-05
HTL_additives_compounds_EMIC	7.0107e-05
Perovskite_additives_compounds_PDMAI	7.00686e-05
HTL_stack_sequence_HTM3	6.98774e-05
Perovskite_deposition_solvents_mixing_ratios_6; 1	6.97033e-05
Perovskite_additives_concentrations_0.07	6.96163e-05
Perovskite_deposition_thermal_annealing_time_10.0 >> 20.0	6.95236e-05
Perovskite_dimension_list_of_layers_3.0	6.94815e-05
ETL_deposition_aggregation_state_of_reactants_Liquid	6.94706e-05
Perovskite_deposition_after_treatment_of_formed_perovskite_Annealed under intense laser pulses	6.90627e-05
Perovskite_deposition_procedure_Evaporation >> Spin-coating	6.90276e-05
ETL_stack_sequence_CMB-vTA	6.89887e-05
Backcontact_stack_sequence_Ag	6.89755e-05
ETL_deposition_reaction_solutions_age_4.0	6.87326e-05
ETL_stack_sequence_PTCBI	6.86583e-05
Perovskite_additives_compounds_Diiodomethane	6.81634e-05
ETL_stack_sequence_ MUTAB	6.81597e-05
Perovskite_composition_c_ions_coefficients_0.17; 2.83	6.80067e-05
Perovskite_band_gap_1.53	6.7929e-05
Encapsulation_stack_sequence_Polymer	6.79206e-05
Perovskite_band_gap_1.51	6.78764e-05
Perovskite_deposition_thermal_annealing_temperature_130 >> 70	6.78735e-05
Perovskite_deposition_thermal_annealing_temperature_60 >> 100	6.78484e-05
range_Mendeleev_Number	6.77568e-05
HTL_stack_sequence_ Al2O3-np	6.77288e-05
HTL_stack_sequence_M:OO	6.76146e-05
ETL_additives_compounds_N; PEI	6.75601e-05
ETL_stack_sequence_TEACl	6.71922e-05
Backcontact_stack_sequence_ITO	6.71916e-05
Perovskite_deposition_thermal_annealing_temperature_Unknown >> Unknown >> 70.0	6.70208e-05
Perovskite_composition_b_ions_Sn	6.70174e-05
Perovskite_additives_compounds_MACSN	6.68689e-05
Perovskite_deposition_thermal_annealing_temperature_40; 100 >> 100	6.67188e-05
HTL_deposition_procedure_CBD	6.65857e-05
ETL_additives_compounds_Stearic acid; EDA	6.63969e-05
Perovskite_additives_concentrations_2	6.60361e-05
HTL_stack_sequence_PFB	6.58673e-05
HTL_stack_sequence_NO2-PEIA	6.57457e-05
Perovskite_additives_compounds_Al2O3-np; Cl	6.56469e-05
Perovskite_deposition_thermal_annealing_temperature_170.0	6.55198e-05
HTL_stack_sequence_SGT-411	6.54736e-05
ETL_additives_compounds_H2PtCl6	6.54588e-05
range_1st_ionization_potential_(kJ/mol)	6.54108e-05
ETL_stack_sequence_TDPP-CN4	6.51357e-05
ETL_deposition_procedure_ Unknown	6.50413e-05
Perovskite_additives_concentrations_0.05 %; nan	6.50412e-05
Perovskite_deposition_solvents_Diiodomethane; DMF; DMSO	6.50344e-05
Perovskite_deposition_thermal_annealing_temperature_100 >> 70	6.49353e-05
Perovskite_composition_none_stoichiometry_components_in_excess_FAI	6.48884e-05
Perovskite_composition_none_stoichiometry_components_in_excess_PbCl2	6.47955e-05
HTL_stack_sequence_Y2	6.46143e-05
HTL_stack_sequence_HTM1	6.44736e-05
Encapsulation_stack_sequence_ SLG	6.44664e-05
Perovskite_deposition_synthesis_atmosphere_N2 >> MAI; N2	6.44425e-05
Perovskite_deposition_procedure_Spin-coating >> Spin-coating >> Spin-coating	6.43638e-05
Perovskite_composition_a_ions_coefficients_2; 1	6.41647e-05
Perovskite_composition_a_ions_coefficients_0.05; 0.7885; 0.1615	6.40677e-05
HTL_additives_compounds_Mo(tfd-COCF3)3; TBP	6.40053e-05
Perovskite_additives_compounds_Mg	6.39015e-05
Perovskite_deposition_solvent_annealing_time_Unknown	6.37562e-05
Perovskite_pl_max_774.0	6.3716e-05
HTL_additives_compounds_Li-TFSI; TBP; FK209	6.36732e-05
ETL_stack_sequence_TiO2-nt	6.32553e-05
HTL_stack_sequence_C201	6.31966e-05
Perovskite_deposition_substrate_temperature_Unknown	6.30131e-05
Perovskite_deposition_thermal_annealing_temperature_70.0 >> 140.0	6.30067e-05
ETL_stack_sequence_ PCBA	6.27766e-05
HTL_additives_compounds_PSS-Na	6.27306e-05
Perovskite_deposition_thermal_annealing_time_5.0 >> 10.0	6.2652e-05
Backcontact_deposition_synthesis_atmosphere_Unknown	6.26329e-05
ETL_additives_compounds_AlCl3	6.25575e-05
Perovskite_deposition_thermal_annealing_temperature_60; 80; 100	6.24347e-05
Perovskite_deposition_thermal_annealing_temperature_60.0; 85.0	6.24261e-05
Perovskite_deposition_procedure_Electrospraying	6.23322e-05
Backcontact_deposition_aggregation_state_of_reactants_Unknown	6.22702e-05
Perovskite_composition_c_ions_coefficients_0.3; 2.7	6.2258e-05
ETL_stack_sequence_ TiO2; SiO2-IO	6.20672e-05
ETL_deposition_solvents_supplier_Unknown	6.20205e-05
Perovskite_deposition_procedure_Flash evaporation	6.19949e-05
HTL_stack_sequence_CZTS	6.19801e-05
ETL_stack_sequence_ Cs2CO3	6.17208e-05
ETL_stack_sequence_PS	6.16812e-05
Perovskite_band_gap_1.725	6.14866e-05
Perovskite_deposition_thermal_annealing_temperature_Unknown >> 135.0	6.12838e-05
Perovskite_deposition_thermal_annealing_temperature_10.0	6.12626e-05
HTL_stack_sequence_Carbon-nt	6.11848e-05
Perovskite_additives_compounds_Acetate; HAc	6.117e-05
Perovskite_deposition_thermal_annealing_time_15.0; 45.0	6.11625e-05
HTL_stack_sequence_pBBTa窶殖DT1	6.11519e-05
range_heat_atomization(kJ/mol)	6.11243e-05
Perovskite_deposition_thermal_annealing_time_14.0	6.10901e-05
Perovskite_deposition_thermal_annealing_temperature_180.0	6.1043e-05
Perovskite_deposition_thermal_annealing_time_3.0 >> 5.0	6.09684e-05
HTL_stack_sequence_ NiO-mp	6.09021e-05
ETL_deposition_substrate_temperature_Unknown	6.08894e-05
ETL_deposition_thermal_annealing_time_60.0	6.08729e-05
Perovskite_deposition_synthesis_atmosphere_relative_humidity_90	6.08361e-05
HTL_stack_sequence_nPrO-DATPA	6.07532e-05
HTL_stack_sequence_pBBTa窶殖DT2	6.06765e-05
HTL_stack_sequence_SFT-TPA	6.0653e-05
HTL_stack_sequence_Porphyrin-H2	6.06334e-05
ETL_surface_treatment_before_next_deposition_step_CO2	6.05064e-05
Perovskite_deposition_thermal_annealing_time_1.0; 4.0	6.04977e-05
Perovskite_composition_c_ions_coefficients_7	6.04063e-05
ETL_deposition_procedure_ Doctor blading	6.0355e-05
Perovskite_deposition_thermal_annealing_time_180.0	6.02543e-05
Perovskite_deposition_thermal_annealing_temperature_80.0 >> 100.0	6.02331e-05
Perovskite_pl_max_755.0	6.02055e-05
Perovskite_deposition_synthesis_atmosphere_Unknown >> MAI	6.02041e-05
Perovskite_deposition_synthesis_atmosphere_Air >> MAI; Vacuum	6.01553e-05
Perovskite_deposition_thermal_annealing_temperature_240.0	6.01449e-05
Perovskite_deposition_thermal_annealing_time_100.0	5.99831e-05
HTL_stack_sequence_Spiro-MeOTAD	5.99344e-05
Perovskite_additives_concentrations_0.017	5.98941e-05
ETL_stack_sequence_In2O3	5.98393e-05
Perovskite_deposition_solvents_GBL >> IPA	5.96584e-05
HTL_additives_compounds_ Undoped	5.95351e-05
Perovskite_additives_concentrations_10 mmg/perovskite_mmol	5.95324e-05
Perovskite_additives_compounds_Acetate; HPA	5.94247e-05
Perovskite_deposition_thermal_annealing_time_Unknown; 5.0	5.91632e-05
HTL_stack_sequence_KR122	5.90822e-05
Perovskite_additives_compounds_PbCl2	5.89621e-05
Perovskite_deposition_thermal_annealing_temperature_40.0 >> 100.0	5.88864e-05
ETL_additives_concentrations_5 mol%	5.88421e-05
Perovskite_deposition_solvent_annealing_solvent_atmosphere_Chlorobenzene; DMF	5.87959e-05
Perovskite_deposition_thermal_annealing_temperature_25; 100	5.87817e-05
Perovskite_deposition_solvents_mixing_ratios_1; 0.0722	5.86352e-05
Encapsulation_stack_sequence_SLG	5.86317e-05
ETL_stack_sequence_ SnO2@TiO2-np	5.83311e-05
Perovskite_deposition_thermal_annealing_time_30.0 >> 20.0	5.80476e-05
Perovskite_deposition_procedure_Spin-coating >> Dropcasting	5.80439e-05
Cell_semitransparent_wavelength_range_nan; nan	5.77631e-05
ETL_stack_sequence_f-C60	5.75682e-05
ETL_stack_sequence_ ITIC	5.74391e-05
mode_Allred-Rockow_electronegativity	5.74349e-05
Perovskite_dimension_0D_False	5.74197e-05
Perovskite_deposition_procedure_Evaporation >> Gas reaction	5.73504e-05
Perovskite_deposition_quenching_media_IR	5.72507e-05
ETL_additives_compounds_TBAPF6	5.71119e-05
Backcontact_deposition_reaction_solutions_compounds_Al	5.70657e-05
HTL_stack_sequence_P-SC6-TiOPc	5.7029e-05
Perovskite_deposition_thermal_annealing_time_15.0 >> 60.0	5.70194e-05
Perovskite_deposition_solvents_mixing_ratios_3; 2; 6	5.69895e-05
Perovskite_additives_compounds_Pb(SCN)2	5.69727e-05
HTL_additives_compounds_Li-bis; Li-TFSI; TBP	5.69315e-05
HTL_stack_sequence_Cu2NiSn4-np	5.67577e-05
Perovskite_additives_concentrations_0.5 wt%	5.66056e-05
Cell_number_of_cells_per_substrate_0	5.63708e-05
Encapsulation_stack_sequence_ Epoxy resin	5.62714e-05
Perovskite_deposition_solvents_DMF; GLB	5.61769e-05
Perovskite_additives_concentrations_50 mM	5.60591e-05
HTL_stack_sequence_MeO-DATPA	5.60566e-05
HTL_stack_sequence_F8T2e	5.59064e-05
HTL_stack_sequence_ MoOx	5.59037e-05
HTL_stack_sequence_CuInS2	5.58522e-05
Perovskite_storage_relative_humidity_24.0	5.57911e-05
Perovskite_deposition_thermal_annealing_temperature_110	5.57599e-05
Perovskite_additives_compounds_Thiourea	5.57543e-05
ETL_deposition_procedure_ Electrospinning	5.57464e-05
HTL_stack_sequence_TS-CuPc	5.56878e-05
HTL_stack_sequence_N-CuMe2Pc	5.56487e-05
HTL_stack_sequence_S2	5.55785e-05
ETL_stack_sequence_ Rhodamine 101	5.55537e-05
Perovskite_deposition_thermal_annealing_time_Unknown >> 10.0; 10.0; 10.0	5.55159e-05
HTL_stack_sequence_H5	5.54718e-05
Perovskite_deposition_thermal_annealing_temperature_80.0 >> 80.0	5.54405e-05
range_crystal_radius	5.53785e-05
ETL_stack_sequence_ ZnO-c	5.53285e-05
Perovskite_deposition_solvents_GBL; N-methyl-2-pyrrolidinone	5.50971e-05
Perovskite_dimension_3D_with_2D_capping_layer_False	5.50967e-05
ETL_stack_sequence_ZnO	5.50494e-05
HTL_stack_sequence_ PFN-Br	5.50471e-05
Perovskite_deposition_thermal_annealing_time_10.0 >> 15.0	5.50441e-05
HTL_deposition_synthesis_atmosphere_N2	5.49431e-05
Perovskite_composition_a_ions_coefficients_0.1; 0.75; 0.15	5.48946e-05
Perovskite_pl_max_776.5	5.47623e-05
Perovskite_deposition_quenching_media_mixing_ratios_40; 60	5.47051e-05
Perovskite_pl_max_754.0	5.40631e-05
ETL_stack_sequence_ITCPTC-Th	5.40381e-05
ETL_stack_sequence_DNDIF3	5.40307e-05
HTL_deposition_solvents_mixing_ratios_1	5.39099e-05
Perovskite_deposition_solvents_DMF >> Methanol	5.39093e-05
Substrate_deposition_procedure_ Commercial	5.38467e-05
Perovskite_additives_concentrations_25	5.37962e-05
Perovskite_additives_concentrations_0.11	5.3748e-05
Perovskite_composition_none_stoichiometry_components_in_excess_FAI; MABr	5.37433e-05
ETL_additives_compounds_ Graphene oxide	5.36873e-05
Perovskite_deposition_synthesis_atmosphere_Vacuum >> MAI	5.36712e-05
Perovskite_deposition_thermal_annealing_time_30.0 >> Unknown	5.36171e-05
HTL_stack_sequence_SFT-TPAM	5.36114e-05
Perovskite_composition_assumption_Solution composition	5.35214e-05
ETL_deposition_thermal_annealing_temperature_500	5.35169e-05
Perovskite_deposition_thermal_annealing_temperature_280.0	5.34707e-05
Backcontact_deposition_procedure_Inkjet printing	5.34661e-05
Perovskite_band_gap_1.45	5.33829e-05
Perovskite_additives_compounds_DNA	5.32841e-05
Perovskite_band_gap_1.517	5.32294e-05
Perovskite_composition_b_ions_coefficients_3	5.30532e-05
Perovskite_deposition_solvents_mixing_ratios_1000; 9	5.29894e-05
HTL_stack_sequence_DORDTS窶典FBT	5.29825e-05
ETL_deposition_thermal_annealing_temperature_150	5.29365e-05
ETL_deposition_reaction_solutions_temperature_Unknown	5.29308e-05
Perovskite_additives_compounds_Acetate; H2O; Hypophosphorous acid	5.28985e-05
Perovskite_deposition_thermal_annealing_time_15.0 >> 5.0	5.28862e-05
Perovskite_additives_concentrations_1 mg/ml	5.27641e-05
Backcontact_deposition_synthesis_atmosphere_Vacuum	5.27037e-05
HTL_deposition_substrate_temperature_Unknown	5.26967e-05
Perovskite_deposition_after_treatment_of_formed_perovskite_Ultrasonic transducer	5.26776e-05
ETL_stack_sequence_DPC60	5.25619e-05
mode_Mulliken_EN	5.25536e-05
Perovskite_composition_a_ions_MA	5.24302e-05
Perovskite_deposition_thermal_annealing_temperature_100; 100	5.23268e-05
Perovskite_storage_atmosphere_Unknown	5.22747e-05
Perovskite_deposition_thermal_annealing_temperature_110.0 >> 110.0	5.22619e-05
Perovskite_deposition_synthesis_atmosphere_Vacuum >> MAI; N2	5.21377e-05
HTL_additives_compounds_TBA-BF4	5.19652e-05
Perovskite_deposition_thermal_annealing_temperature_65; 105	5.1945e-05
Perovskite_deposition_thermal_annealing_temperature_50; 85	5.19382e-05
Perovskite_composition_c_ions_coefficients_1.5; 1.5	5.18626e-05
ETL_deposition_thermal_annealing_temperature_150	5.17458e-05
Perovskite_deposition_solvents_mixing_ratios_8.2; 1	5.17396e-05
Perovskite_deposition_thermal_annealing_time_10.0 >> 1.7	5.1731e-05
HTL_deposition_procedure_ Sputtering	5.16531e-05
HTL_deposition_thermal_annealing_atmosphere_Unknown	5.15802e-05
HTL_stack_sequence_XDB	5.1566e-05
range_Allred-Rockow_electronegativity	5.1363e-05
Perovskite_additives_compounds_(adamantan窶・窶笥l)methanammonium; HI	5.13133e-05
Perovskite_deposition_thermal_annealing_temperature_60.0; 100.0	5.12931e-05
Backcontact_additives_compounds_Undoped	5.12552e-05
ETL_stack_sequence_ZnO-nw	5.11894e-05
ETL_stack_sequence_ AZO	5.11658e-05
Perovskite_deposition_reaction_solutions_temperature_Unknown	5.10766e-05
Perovskite_deposition_thermal_annealing_time_3.0; 5.0; 10.0	5.10264e-05
Perovskite_additives_compounds_CH3COCHCOCH3	5.08962e-05
Perovskite_deposition_synthesis_atmosphere_relative_humidity_40.0	5.07899e-05
HTL_stack_sequence_PDCBT	5.07255e-05
Encapsulation_stack_sequence_UV-curable epoxy	5.06254e-05
Perovskite_dimension_2D_False	5.03085e-05
HTL_stack_sequence_WT3	5.0285e-05
HTL_stack_sequence_BL07	5.02621e-05
Perovskite_additives_compounds_TEOS	5.02419e-05
Perovskite_deposition_procedure_Evaporation >> Evaporation	5.02095e-05
Perovskite_deposition_thermal_annealing_temperature_Unknown >> 140.0	5.00339e-05
Perovskite_composition_a_ions_coefficients_0.1; 0.9	5.00321e-05
Perovskite_composition_c_ions_coefficients_13	4.99669e-05
Perovskite_deposition_thermal_annealing_time_2.0 >> 2.0	4.99552e-05
Substrate_stack_sequence_ ITO:ATO	4.9872e-05
Perovskite_deposition_thermal_annealing_temperature_Unknown >> 150.12	4.98361e-05
Perovskite_deposition_quenching_media_additives_compounds_SWCNTs	4.9822e-05
Perovskite_deposition_solvents_ IPA	4.97482e-05
Perovskite_composition_short_form_CsPbBrI	4.97178e-05
HTL_additives_concentrations_50 %; nan	4.96426e-05
Perovskite_additives_concentrations_0.167	4.96321e-05
Perovskite_additives_compounds_HCl	4.96145e-05
HTL_stack_sequence_BTPA	4.9577e-05
ETL_deposition_thermal_annealing_atmosphere_Vacuum	4.95427e-05
ETL_stack_sequence_ C60-SAM	4.9475e-05
Perovskite_deposition_after_treatment_of_formed_perovskite_Ultrasonic vibration treatment	4.94124e-05
Perovskite_additives_concentrations_0.04; 0.003	4.93299e-05
Backcontact_deposition_procedure_Spray-coating	4.92568e-05
Backcontact_deposition_synthesis_atmosphere_Ar	4.90844e-05
ETL_stack_sequence_ Cs2CO3	4.89359e-05
HTL_stack_sequence_p-DTS(FBTTh2)2	4.88743e-05
HTL_stack_sequence_DR3TBDTT	4.8812e-05
Perovskite_pl_max_815.0	4.87939e-05
ETL_stack_sequence_C60; PCBM-60	4.87185e-05
HTL_stack_sequence_H-PheDOT	4.8524e-05
Perovskite_deposition_procedure_Sputtering >> Gas reaction	4.85132e-05
Perovskite_composition_b_ions_coefficients_4	4.84674e-05
Perovskite_dimension_0D_True	4.83976e-05
Perovskite_deposition_thermal_annealing_temperature_250.0	4.82804e-05
Perovskite_additives_compounds_PEO	4.82666e-05
Perovskite_deposition_thermal_annealing_temperature_100 >> 100; 100	4.81612e-05
Perovskite_deposition_synthesis_atmosphere_relative_humidity_30	4.80596e-05
HTL_stack_sequence_PCBM-60	4.79931e-05
mode_Number_of_unfilled_d_valence_electrons	4.79836e-05
Perovskite_deposition_thermal_annealing_temperature_35; 120	4.79504e-05
HTL_deposition_procedure_Dipp-coating	4.79024e-05
range_polarizability(A^3)	4.78118e-05
Backcontact_deposition_procedure_Sputtering	4.77814e-05
Perovskite_deposition_thermal_annealing_time_10.0; 60.0	4.77794e-05
Perovskite_deposition_solvents_mixing_ratios_1 >> nan	4.77372e-05
Perovskite_deposition_thermal_annealing_temperature_75.0	4.76727e-05
Backcontact_deposition_reaction_solutions_compounds_Ag	4.76418e-05
ETL_stack_sequence_Ti3C2Tx	4.76397e-05
Perovskite_additives_concentrations_42.9	4.7593e-05
ETL_additives_compounds_Nb	4.7489e-05
Perovskite_deposition_solvents_mixing_ratios_1000; 128	4.74042e-05
Perovskite_additives_concentrations_0.23	4.74039e-05
Perovskite_deposition_solvents_mixing_ratios_60; 7 >> 1	4.73761e-05
Perovskite_deposition_solvents_mixing_ratios_nan >> 4; 96	4.73714e-05
Module_number_of_cells_in_module_4	4.72823e-05
Perovskite_deposition_thermal_annealing_time_35.0	4.72296e-05
Backcontact_stack_sequence_ITO	4.71586e-05
Perovskite_additives_compounds_C60-PYP	4.71204e-05
Perovskite_composition_c_ions_coefficients_10	4.70907e-05
Perovskite_pl_max_802.0	4.70375e-05
Perovskite_deposition_thermal_annealing_time_ 10.0	4.68659e-05
Perovskite_deposition_procedure_ Spin-coating	4.68608e-05
ETL_deposition_procedure_Doctor blading	4.66998e-05
Perovskite_deposition_thermal_annealing_temperature_Unknown >> 120.0	4.66373e-05
Perovskite_additives_compounds_Cl; PVP	4.65775e-05
Perovskite_pl_max_784.0	4.63363e-05
Perovskite_deposition_synthesis_atmosphere_N2 >> Air	4.63291e-05
Perovskite_band_gap_1.69	4.62693e-05
ETL_deposition_solvents_supplier_Sigma Aldrich	4.62468e-05
Perovskite_deposition_thermal_annealing_atmosphere_Unknown >> Unknown	4.61756e-05
Perovskite_deposition_reaction_solutions_compounds_MAI; PbI2 >> MAI	4.61592e-05
Backcontact_stack_sequence_FTO	4.61458e-05
Perovskite_additives_compounds_PbAc2	4.61285e-05
Perovskite_deposition_thermal_annealing_temperature_100 >> 100	4.60355e-05
Perovskite_pl_max_795.0	4.59074e-05
Substrate_stack_sequence_PET	4.58543e-05
ETL_stack_sequence_C70	4.58517e-05
HTL_stack_sequence_PMMA	4.58156e-05
Perovskite_deposition_solvents_mixing_ratios_10; 1 >> 1	4.58136e-05
ETL_deposition_procedure_Doctor blading	4.57868e-05
Perovskite_deposition_quenching_media_Propyl acetate	4.57522e-05
Perovskite_deposition_thermal_annealing_time_1.5; 25.0	4.5706e-05
ETL_stack_sequence_ITIC	4.56917e-05
Perovskite_deposition_thermal_annealing_temperature_Unknown >> 125.0	4.56904e-05
Perovskite_band_gap_1.8	4.56812e-05
HTL_stack_sequence_ CuPc	4.55925e-05
Perovskite_pl_max_763.5	4.55876e-05
HTL_additives_compounds_FK209; TBP	4.55542e-05
Perovskite_deposition_solvents_mixing_ratios_7; 3 >> 1	4.55267e-05
Perovskite_composition_a_ions_coefficients_0.4; 0.6	4.5481e-05
Perovskite_deposition_thermal_annealing_atmosphere_N2	4.53822e-05
ETL_stack_sequence_TEABr	4.53227e-05
Perovskite_band_gap_1.668	4.52694e-05
HTL_stack_sequence_SFX-TPA	4.5169e-05
HTL_additives_compounds_ FK209; Li-TFSI; TBP	4.51306e-05
HTL_stack_sequence_BChl-1	4.51185e-05
Perovskite_deposition_reaction_solutions_concentrations_1.4 M	4.51121e-05
Perovskite_deposition_thermal_annealing_time_10.0; 90.0	4.5109e-05
Perovskite_deposition_synthesis_atmosphere_Inert >> Inert	4.49323e-05
ETL_additives_compounds_ Li-TSFI	4.49313e-05
Backcontact_stack_sequence_PTAA	4.48615e-05
HTL_stack_sequence_ Au-np	4.48359e-05
Perovskite_deposition_quenching_media_Ether	4.47145e-05
Perovskite_deposition_solvents_mixing_ratios_4; 7	4.46524e-05
ETL_stack_sequence_ TiO2-mp; TiO2-nw	4.45549e-05
Perovskite_deposition_quenching_media_Chlorobenzene; H2O	4.45494e-05
Perovskite_additives_concentrations_10 mol%	4.44954e-05
Perovskite_deposition_procedure_Single crystal growth	4.44624e-05
Backcontact_stack_sequence_AgAl	4.44184e-05
HTL_additives_compounds_F4-TCNQ	4.43362e-05
Perovskite_deposition_solvents_Toluene	4.43323e-05
ETL_stack_sequence_Graphene; TiO2-c	4.43229e-05
ETL_stack_sequence_TiO2	4.43025e-05
Backcontact_deposition_procedure_RF Magnetron Sputtering	4.43004e-05
Perovskite_deposition_reaction_solutions_compounds_nan >> EDBE	4.42008e-05
Perovskite_additives_concentrations_4 wt%	4.41361e-05
Perovskite_deposition_solvents_DMSO; NMP	4.38958e-05
Perovskite_additives_compounds_PVP	4.38913e-05
HTL_stack_sequence_Carbon-QDs	4.38747e-05
Perovskite_additives_concentrations_0.66; 0.075	4.38186e-05
Perovskite_additives_compounds_Ca	4.37626e-05
HTL_stack_sequence_BT41	4.37369e-05
Perovskite_deposition_thermal_annealing_temperature_100.0 >> 140.0	4.36377e-05
Perovskite_composition_a_ions_coefficients_0.17; 0.83	4.35991e-05
Perovskite_deposition_thermal_annealing_temperature_100.0 >> 70.0	4.32787e-05
HTL_stack_sequence_Y2A2	4.31514e-05
ETL_stack_sequence_ SnO2	4.30858e-05
Perovskite_additives_concentrations_12 mg/ml	4.30729e-05
Perovskite_storage_atmosphere_N2	4.30436e-05
Perovskite_deposition_thermal_annealing_time_5.0; 20.0	4.30313e-05
Perovskite_deposition_thermal_annealing_time_20.0 >> 45.0	4.29494e-05
HTL_stack_sequence_TBC-1	4.28482e-05
Perovskite_deposition_thermal_annealing_time_10.0; 30.0	4.25544e-05
ETL_stack_sequence_HATNA-F6	4.24629e-05
Perovskite_additives_compounds_Graphene-nanofibers	4.24563e-05
Perovskite_band_gap_1.64	4.23882e-05
Perovskite_pl_max_743.0	4.23489e-05
Perovskite_deposition_after_treatment_of_formed_perovskite_Atmospheric-pressure dielectric barrier discharge	4.2307e-05
HTL_stack_sequence_SGT-405	4.22893e-05
Perovskite_deposition_solvents_mixing_ratios_7.69; 1	4.2233e-05
HTL_additives_compounds_CuSCN	4.22087e-05
HTL_stack_sequence_C6TBPH2	4.19554e-05
HTL_stack_sequence_BDT:TT	4.19408e-05
Perovskite_deposition_thermal_annealing_time_Unknown >> 10.4	4.19342e-05
Perovskite_composition_c_ions_coefficients_2; 1	4.19301e-05
Encapsulation_stack_sequence_Polyvinyl pyrrolidone	4.18608e-05
ETL_additives_compounds_Ag	4.17759e-05
HTL_stack_sequence_PEAI	4.17197e-05
HTL_additives_compounds_NDP9	4.17136e-05
HTL_additives_compounds_Co	4.1665e-05
Backcontact_stack_sequence_Pt	4.16396e-05
HTL_deposition_reaction_solutions_compounds_supplier_Unknown	4.13655e-05
ETL_deposition_procedure_ Hydrothermal	4.13477e-05
Perovskite_additives_compounds_I2	4.13356e-05
Perovskite_deposition_after_treatment_of_formed_perovskite_Dipped in Anisole	4.13199e-05
HTL_stack_sequence_ PFN	4.12996e-05
HTL_stack_sequence_PTPD2	4.11738e-05
HTL_stack_sequence_ F6-TCNNQ; TaTm	4.11402e-05
ETL_surface_treatment_before_next_deposition_step_ZnAl-LDH and thermal annealing	4.11316e-05
HTL_stack_sequence_BPAPF	4.10845e-05
Backcontact_deposition_reaction_solutions_compounds_Au	4.0931e-05
Perovskite_additives_concentrations_0.025	4.09081e-05
HTL_stack_sequence_P3CT-K	4.08908e-05
HTL_deposition_procedure_Pulsed laser deposition	4.08527e-05
Perovskite_deposition_procedure_Spin-coating >> Diffusion	4.07811e-05
Perovskite_additives_concentrations_0.12	4.07782e-05
ETL_additives_compounds_ B; F; PEI	4.07532e-05
Substrate_etching_procedure_Zn-powder; HCl >> Mecanical scrubbing	4.07499e-05
ETL_stack_sequence_(RuCp*mes)2	4.06509e-05
Perovskite_deposition_quenching_media_Air	4.06376e-05
Backcontact_stack_sequence_PH 1000	4.05994e-05
Perovskite_deposition_after_treatment_of_formed_perovskite_met_40kHz; 5W; 2 min	4.05362e-05
ETL_additives_concentrations_nan	4.05115e-05
Perovskite_deposition_procedure_Dipp-coating	4.05102e-05
Perovskite_additives_concentrations_15 mol%	4.04504e-05
ETL_stack_sequence_Nb2O5	4.03376e-05
Perovskite_deposition_thermal_annealing_temperature_170	4.02836e-05
range_MB_electonegativity	4.02636e-05
Backcontact_stack_sequence_ Ag	4.02516e-05
Perovskite_additives_compounds_LiI	4.0137e-05
ETL_stack_sequence_ITIC	4.0052e-05
HTL_additives_compounds_Li@C60-TFSI; TBP	3.99728e-05
Perovskite_deposition_thermal_annealing_time_10.0 >> 5.0	3.99675e-05
ETL_stack_sequence_ SnO2-c	3.99347e-05
ETL_additives_compounds_ Undoped	3.98712e-05
Perovskite_composition_none_stoichiometry_components_in_excess_CsBr	3.98541e-05
Perovskite_pl_max_659.0	3.97587e-05
Perovskite_band_gap_1.3	3.9743e-05
ETL_deposition_procedure_ Electrospraying	3.97197e-05
Perovskite_deposition_synthesis_atmosphere_N2 >> Methylamin; N2	3.96977e-05
Perovskite_additives_concentrations_0.6 wt.%	3.96422e-05
Substrate_thickness	3.9598e-05
Perovskite_composition_short_form_MAPbI	3.95829e-05
HTL_stack_sequence_MEH-PPV	3.95648e-05
ETL_deposition_procedure_Magnetron sputtering	3.95416e-05
Backcontact_deposition_thermal_annealing_temperature_25	3.93984e-05
Perovskite_composition_assumption_XRD	3.93303e-05
Perovskite_additives_concentrations_100 ppm	3.9311e-05
HTL_deposition_procedure_Ultrasonic spray	3.92904e-05
Module_number_of_cells_in_module_6	3.92636e-05
Perovskite_dimension_list_of_layers_0.0	3.92555e-05
Perovskite_deposition_thermal_annealing_temperature_240; 105	3.91859e-05
Perovskite_additives_compounds_Hexamethylphosphoramide	3.91464e-05
Perovskite_additives_concentrations_0.1 M	3.91318e-05
ETL_stack_sequence_PTEG-1	3.91067e-05
Perovskite_additives_compounds_PCBM-60	3.89915e-05
Perovskite_pl_max_700.0	3.89885e-05
Module_area_effective_12.0	3.8977e-05
Perovskite_band_gap_1.28	3.89262e-05
Perovskite_deposition_quenching_media_volume_Unknown	3.89249e-05
Perovskite_deposition_thermal_annealing_time_15.0; 60.0	3.88737e-05
Perovskite_deposition_thermal_annealing_time_1.0; 9.0	3.88574e-05
Substrate_stack_sequence_ Ag-nw	3.8857e-05
Perovskite_deposition_thermal_annealing_time_4.0	3.88016e-05
ETL_deposition_solvents_mixing_ratios_1	3.87676e-05
Perovskite_band_gap_2.3	3.87559e-05
Perovskite_deposition_solvents_mixing_ratios_1; 3.3	3.87166e-05
Perovskite_additives_compounds_4-ABPACl	3.8567e-05
Perovskite_pl_max_779.0	3.85414e-05
HTL_stack_sequence_PCPDTBT	3.85358e-05
HTL_additives_compounds_PEO	3.85174e-05
HTL_stack_sequence_PEDOT:PSS; PEI	3.84972e-05
Perovskite_additives_compounds_TiO2-nw	3.84909e-05
Perovskite_composition_short_form_CsFAMAPbSnI	3.84485e-05
HTL_additives_compounds_Li-TFSI; TBP; V2O5	3.83023e-05
Perovskite_deposition_solvents_ Propanetriol	3.8282e-05
Perovskite_additives_compounds_beta-cyclodextrin	3.82193e-05
HTL_stack_sequence_Z2	3.82192e-05
Perovskite_deposition_thermal_annealing_time_Unknown >> Unknown >> 90.0	3.82187e-05
Perovskite_additives_compounds_CH3CH2COO	3.81873e-05
Perovskite_additives_concentrations_nan; 1.66 %	3.81194e-05
Perovskite_additives_concentrations_0.08	3.80366e-05
Perovskite_deposition_quenching_media_2-Butanol	3.80354e-05
HTL_stack_sequence_Perylene	3.80164e-05
Perovskite_composition_a_ions_coefficients_0.2; 0.8	3.79755e-05
Perovskite_deposition_thermal_annealing_temperature_145.0	3.79019e-05
Perovskite_deposition_thermal_annealing_temperature_60.0 >> 100.0	3.78872e-05
Perovskite_deposition_quenching_media_Antisolvent	3.78726e-05
HTL_stack_sequence_PVBT-SB	3.78653e-05
Perovskite_deposition_synthesis_atmosphere_DMSO; N2 >> N2	3.78627e-05
HTL_stack_sequence_ Al2O3-mp	3.78244e-05
ETL_stack_sequence_NDI-P	3.78116e-05
HTL_stack_sequence_FDT	3.78107e-05
Perovskite_deposition_solvents_mixing_ratios_23; 2 >> 1; 3	3.77987e-05
Perovskite_additives_compounds_Spiro	3.77858e-05
HTL_stack_sequence_H2Pc-1	3.77358e-05
Perovskite_deposition_thermal_annealing_temperature_80.0; 100.0	3.77213e-05
Perovskite_composition_short_form_FAPbI	3.77105e-05
Perovskite_additives_concentrations_0.003	3.76355e-05
Perovskite_composition_a_ions_coefficients_0.85; 0.15	3.76026e-05
HTL_stack_sequence_SBFCz2	3.75709e-05
Perovskite_additives_concentrations_0.05; nan	3.75522e-05
ETL_stack_sequence_CITP-SAM	3.74559e-05
HTL_deposition_synthesis_atmosphere_Air	3.74423e-05
Perovskite_deposition_quenching_media_additives_concentrations_0.001 M	3.73912e-05
ETL_deposition_solvents_ Methanol	3.73867e-05
Perovskite_deposition_thermal_annealing_temperature_90 >> 25 >> 90	3.73152e-05
Perovskite_deposition_thermal_annealing_time_10.0; 10.0 >> 150.0	3.72747e-05
Perovskite_deposition_thermal_annealing_time_Unknown >> Unknown >> 150.0	3.71056e-05
Perovskite_deposition_quenching_media_additives_concentrations_0.005	3.70969e-05
Perovskite_additives_concentrations_nan; 10 %	3.70898e-05
Perovskite_deposition_solvents_mixing_ratios_1000; 5	3.70709e-05
Backcontact_deposition_substrate_temperature_Unknown	3.69709e-05
Perovskite_deposition_solvents_DMF >> IPA >> IPA	3.69121e-05
Perovskite_storage_relative_humidity_80.0	3.69111e-05
HTL_stack_sequence_DTB	3.684e-05
range_Pauling_Electronegativity	3.67763e-05
Perovskite_additives_compounds_Cl; PEO	3.67576e-05
Perovskite_deposition_solvents_GBL >> GBL	3.66709e-05
HTL_stack_sequence_DPA-TPM	3.66703e-05
Perovskite_deposition_synthesis_atmosphere_Air >> MAI	3.662e-05
HTL_additives_compounds_Li-TFSI; TBP	3.64372e-05
Perovskite_deposition_solvents_Methylammonium acetate	3.64319e-05
Backcontact_deposition_procedure_RF sputtering	3.63318e-05
HTL_additives_compounds_Li-TFSI; TPB	3.62705e-05
ETL_stack_sequence_ Benzoic acid	3.61937e-05
Perovskite_deposition_thermal_annealing_temperature_60; 80	3.61231e-05
Perovskite_additives_concentrations_33 mol%	3.61211e-05
Perovskite_deposition_thermal_annealing_atmosphere_Unknown	3.60544e-05
Perovskite_deposition_aggregation_state_of_reactants_ Liquid	3.60032e-05
Perovskite_deposition_aggregation_state_of_reactants_Liquid >> Solid	3.5974e-05
Perovskite_deposition_thermal_annealing_atmosphere_Air	3.59422e-05
HTL_additives_compounds_Sodium Citrate	3.5818e-05
ETL_deposition_procedure_ Dropcasting	3.57513e-05
Perovskite_deposition_thermal_annealing_time_3.0; 30.0	3.57085e-05
HTL_deposition_reaction_solutions_concentrations_5 mg/ml	3.57051e-05
ETL_stack_sequence_ Nb2O5	3.56751e-05
ETL_deposition_reaction_solutions_compounds_supplier_Unknown	3.56668e-05
Perovskite_deposition_solvents_mixing_ratios_18; 1	3.56041e-05
ETL_stack_sequence_ PbI2	3.55914e-05
Perovskite_composition_c_ions_coefficients_0.256; 0.744	3.55532e-05
Perovskite_deposition_thermal_annealing_time_5.0 >> 15.0	3.55468e-05
ETL_additives_compounds_Nb	3.55211e-05
ETL_additives_compounds_RGraphene oxide	3.55057e-05
Perovskite_deposition_solvents_mixing_ratios_20; 1	3.54931e-05
HTL_stack_sequence_PbS-QDs	3.54814e-05
ETL_stack_sequence_WO3	3.54133e-05
Perovskite_deposition_thermal_annealing_time_1.0 >> 15.0	3.5413e-05
Perovskite_deposition_thermal_annealing_temperature_70.0 >> 110.0	3.54029e-05
ETL_deposition_reaction_solutions_compounds_PCBM-60	3.53319e-05
Perovskite_deposition_thermal_annealing_temperature_60; 85	3.52943e-05
HTL_stack_sequence_m-MTDATA	3.52427e-05
Perovskite_deposition_synthesis_atmosphere_Unknown >> Vacuum	3.52044e-05
Perovskite_deposition_thermal_annealing_time_1.0; 60.0	3.51953e-05
Perovskite_additives_compounds_Pb(SCN)2; SnF2	3.51798e-05
ETL_stack_sequence_ FPI-PEIE	3.51446e-05
Perovskite_additives_compounds_YbCl3	3.51375e-05
Perovskite_deposition_thermal_annealing_temperature_25.0 >> 150.0	3.49813e-05
Perovskite_composition_a_ions_Cs; FA	3.48549e-05
Perovskite_deposition_synthesis_atmosphere_relative_humidity_20	3.48041e-05
ETL_deposition_aggregation_state_of_reactants_Liquid	3.47534e-05
mode_thermal_conductivity_(W/(m_K))_	3.47058e-05
HTL_deposition_substrate_temperature_25	3.46938e-05
Perovskite_additives_concentrations_0.099	3.46161e-05
HTL_stack_sequence_SGT-410	3.46071e-05
ETL_stack_sequence_NDI-BiSe	3.46011e-05
Perovskite_deposition_quenching_media_Butyl acetate	3.45137e-05
Perovskite_deposition_thermal_annealing_temperature_70.0 >> 80.0	3.45026e-05
Perovskite_deposition_after_treatment_of_formed_perovskite_Washed with IPA >> Washed with Dichloromethane	3.45007e-05
HTL_deposition_reaction_solutions_compounds_PEDOT:PSS	3.43967e-05
Add_lay_front_function_Antireflection	3.42552e-05
Perovskite_deposition_after_treatment_of_formed_perovskite_met_85 deg. C in Air 50 % RH	3.41994e-05
Perovskite_deposition_quenching_media_Dichlorobenzene	3.41459e-05
Perovskite_additives_compounds_4-(1H-imidazol-3-ium-3-yl) butane-1-sulfonate	3.40638e-05
Perovskite_deposition_solvents_DMF	3.40293e-05
ETL_stack_sequence_ SnO2-nanosheets	3.39832e-05
HTL_stack_sequence_BEDN	3.39649e-05
Perovskite_additives_concentrations_2.5 wt%	3.39094e-05
Perovskite_deposition_quenching_media_additives_compounds_I2	3.39035e-05
HTL_stack_sequence_COPV4	3.38771e-05
ETL_stack_sequence_PEI	3.38685e-05
Perovskite_deposition_solvents_mixing_ratios_1; 1; nan	3.3824e-05
ETL_deposition_synthesis_atmosphere_ N2	3.37081e-05
HTL_stack_sequence_MoO3	3.36821e-05
HTL_deposition_reaction_solutions_compounds_Li-TFSI; H-Z1; TBP	3.36722e-05
Perovskite_deposition_reaction_solutions_concentrations_0.5 M >> 38 mg/ml	3.36321e-05
Perovskite_deposition_thermal_annealing_time_30.0 >> 45.0	3.36071e-05
HTL_stack_sequence_OMeTP-SAM	3.35829e-05
Perovskite_deposition_aggregation_state_of_reactants_Liquid	3.35148e-05
Perovskite_deposition_quenching_media_Gas	3.34692e-05
HTL_stack_sequence_Z33	3.34219e-05
Perovskite_composition_c_ions_coefficients_16	3.33924e-05
Perovskite_additives_compounds_Cl; I2	3.32934e-05
Perovskite_deposition_solvent_annealing_timing_Under	3.3287e-05
Perovskite_deposition_synthesis_atmosphere_relative_humidity_40	3.32756e-05
ETL_stack_sequence_Al2O3-mp	3.32581e-05
Perovskite_additives_concentrations_nan; 0.01	3.31882e-05
HTL_additives_compounds_MoO3	3.31725e-05
Perovskite_composition_b_ions_coefficients_0.85; 0.15	3.31524e-05
HTL_stack_sequence_TSHBC-CF3	3.30642e-05
ETL_additives_compounds_ Graphene	3.30475e-05
range_Atomic_Radius	3.30398e-05
HTL_stack_sequence_MEH-PPV-20	3.28671e-05
Perovskite_deposition_solvents_mixing_ratios_11; 1	3.28092e-05
ETL_stack_sequence_TN-P	3.27699e-05
Perovskite_deposition_thermal_annealing_temperature_300.0	3.27444e-05
Perovskite_band_gap_1.587	3.27247e-05
Backcontact_stack_sequence_ Ag-nw	3.26743e-05
Perovskite_deposition_thermal_annealing_temperature_115.0	3.26605e-05
Cell_area_total_0.1	3.26378e-05
Perovskite_deposition_after_treatment_of_formed_perovskite_Dried under flow of clean air	3.26002e-05
HTL_deposition_thermal_annealing_temperature_200.0	3.25785e-05
Perovskite_additives_concentrations_2.5 wt%; 1.5 wt%	3.25633e-05
ETL_stack_sequence_ CdS	3.25601e-05
Perovskite_deposition_solvents_mixing_ratios_1 >> 9; 1	3.25438e-05
Perovskite_additives_concentrations_nan; 5 %	3.25157e-05
Perovskite_composition_a_ions_coefficients_0.6; 0.4	3.25024e-05
Perovskite_storage_relative_humidity_70.0	3.24905e-05
Perovskite_deposition_solvents_mixing_ratios_600; 78	3.24739e-05
Perovskite_additives_compounds_Formamide; PEA	3.24459e-05
Perovskite_deposition_solvents_mixing_ratios_1; 2.3	3.24304e-05
HTL_stack_sequence_BTF4	3.24021e-05
ETL_deposition_aggregation_state_of_reactants_ Liquid	3.23525e-05
Perovskite_deposition_thermal_annealing_temperature_100 >> 150	3.23106e-05
Perovskite_pl_max_757.0	3.23083e-05
Perovskite_band_gap_1.7	3.23025e-05
min_specific_heat_(J/g_K)_	3.22849e-05
ETL_stack_sequence_FPDI	3.22518e-05
Perovskite_deposition_thermal_annealing_temperature_Unknown >> 180.0	3.22333e-05
ETL_stack_sequence_ PDINO	3.22158e-05
Perovskite_deposition_solvents_acetonitrile; Ethanol; Methylamine	3.21166e-05
ETL_stack_sequence_ ZnO-c	3.20452e-05
ETL_stack_sequence_Fe2O3	3.20102e-05
Perovskite_deposition_thermal_annealing_time_60.0 >> 10.0	3.19726e-05
min_Gordy_electonegativity	3.19683e-05
Backcontact_deposition_thermal_annealing_temperature_Unknown	3.19467e-05
Perovskite_deposition_quenching_media_Triochloromethane	3.19344e-05
Perovskite_deposition_solvents_2-methoxyethanol; DMSO; GBL	3.18578e-05
HTL_deposition_thermal_annealing_temperature_25 >> 450	3.18515e-05
Perovskite_additives_concentrations_0.10 wt%	3.18477e-05
HTL_additives_compounds_Co; Li-TFSI; TBP	3.17975e-05
ETL_deposition_procedure_Spray-pyrolys >> Hydrothermal	3.17395e-05
HTL_stack_sequence_KR360	3.1607e-05
Perovskite_deposition_procedure_Spin-coating >> Spray-coating	3.15969e-05
HTL_stack_sequence_BTF1	3.15612e-05
ETL_stack_sequence_ TiO2-mp; YVO4:Eu:Bi-np	3.155e-05
Perovskite_additives_concentrations_0.0005	3.14576e-05
Perovskite_deposition_solvents_mixing_ratios_100; 12 >> 1	3.14437e-05
HTL_additives_concentrations_0.1	3.14335e-05
Perovskite_deposition_thermal_annealing_atmosphere_ 70	3.12667e-05
HTL_stack_sequence_TPADPP-1	3.12596e-05
Perovskite_deposition_thermal_annealing_time_30.0 >> 0.0 >> 120.0	3.12202e-05
Perovskite_composition_a_ions_coefficients_0.25; 0.75	3.11666e-05
HTL_stack_sequence_TaTm	3.11219e-05
Perovskite_deposition_thermal_annealing_time_70.0	3.11147e-05
ETL_additives_compounds_ RGraphene oxide	3.11102e-05
Perovskite_deposition_synthesis_atmosphere_relative_humidity_45	3.10956e-05
HTL_deposition_reaction_solutions_concentrations_10 mg/ml	3.10475e-05
ETL_additives_compounds_ CTAB	3.10363e-05
Perovskite_deposition_procedure_Evaporation >> Electrodeposition	3.10284e-05
Perovskite_deposition_solvents_mixing_ratios_8; 2	3.09736e-05
Perovskite_deposition_quenching_media_Hot air	3.09568e-05
Perovskite_deposition_solvents_supplier_Unknown	3.09488e-05
Perovskite_additives_concentrations_0.09	3.0937e-05
Perovskite_deposition_synthesis_atmosphere_Vacuum >> Vacuum	3.08485e-05
Perovskite_additives_concentrations_1.5	3.08401e-05
Perovskite_deposition_solvents_mixing_ratios_5; 5	3.08292e-05
ETL_stack_sequence_AZO	3.07735e-05
Perovskite_deposition_solvents_mixing_ratios_15; 35	3.07709e-05
Perovskite_deposition_solvents_mixing_ratios_ 1	3.07144e-05
Perovskite_additives_concentrations_5	3.07029e-05
Substrate_cleaning_procedure_DIWater >> Ultrasonic bath >> Ethanol >> Ultrasonic bath >> Acetone >> Ultrasonic bath >> Oven drying >> UV-Ozone	3.06811e-05
mode_Cohesive_energy	3.06631e-05
Perovskite_pl_max_768.3	3.06172e-05
Perovskite_deposition_thermal_annealing_time_30.0; 60.0	3.06072e-05
ETL_additives_concentrations_5 wt%	3.053e-05
Perovskite_composition_a_ions_coefficients_0.06; 0.78; 0.16	3.05274e-05
HTL_stack_sequence_MeO-PPV	3.0514e-05
HTL_stack_sequence_PFO	3.04755e-05
Perovskite_deposition_thermal_annealing_time_Unknown >> 35.0	3.04694e-05
Perovskite_composition_a_ions_coefficients_0.08; 0.76; 0.16	3.04675e-05
Perovskite_deposition_solvents_supplier_Sigma Aldrich; Sigma Aldrich	3.04277e-05
Perovskite_additives_compounds_EACl	3.04061e-05
Perovskite_additives_compounds_rGO	3.03966e-05
ETL_stack_sequence_SnO2	3.03517e-05
Perovskite_deposition_quenching_media_additives_concentrations_0.015	3.03146e-05
HTL_stack_sequence_NaYF4:Yb:Tm-np	3.02557e-05
HTL_stack_sequence_H-Z1	3.02219e-05
Perovskite_additives_compounds_PMMA; Rb	3.0152e-05
Perovskite_composition_c_ions_coefficients_0.1; 2.9	3.01506e-05
ETL_stack_sequence_ PCBM-60; PTAA	3.00867e-05
Perovskite_deposition_thermal_annealing_time_Unknown >> 0.0	3.00683e-05
ETL_deposition_thermal_annealing_time_30.0	3.00614e-05
Perovskite_deposition_procedure_Dropcasting >> CBD	3.00437e-05
Perovskite_pl_max_522.0	3.00312e-05
Perovskite_band_gap_1.638	2.99815e-05
HTL_stack_sequence_P3HT	2.99693e-05
Backcontact_stack_sequence_WO3	2.98329e-05
Perovskite_deposition_thermal_annealing_temperature_Unknown >> 95.0	2.98102e-05
HTL_additives_compounds_FK209	2.98052e-05
ETL_deposition_synthesis_atmosphere_Air	2.97399e-05
HTL_stack_sequence_Au@SiO2-nw	2.97207e-05
Perovskite_deposition_procedure_Spin-coating >> CBD >> Spin-coating	2.97063e-05
range_Covalent_Radius	2.96635e-05
HTL_stack_sequence_mDPA-DBTP	2.9662e-05
min_Mendeleev_Number	2.96479e-05
Perovskite_storage_atmosphere_Air	2.96473e-05
Perovskite_composition_short_form_CsFAPbI	2.96155e-05
Perovskite_additives_concentrations_90 mol%	2.96038e-05
ETL_stack_sequence_ Graphene; Al2O3-mp	2.95866e-05
Perovskite_deposition_thermal_annealing_temperature_110; 115	2.95658e-05
Backcontact_stack_sequence_Ni	2.95558e-05
HTL_additives_compounds_BCF	2.95236e-05
Perovskite_deposition_solvents_mixing_ratios_3; 2	2.95011e-05
Perovskite_pl_max_710.0	2.94572e-05
Perovskite_band_gap_1.95	2.93441e-05
ETL_deposition_solvents_mixing_ratios_1	2.93301e-05
Perovskite_storage_time_until_next_deposition_step_1200.0	2.93252e-05
HTL_stack_sequence_P3OFHT	2.93179e-05
Perovskite_deposition_solvents_mixing_ratios_2.3; 1	2.92989e-05
Perovskite_deposition_procedure_Evaporation >> CBD	2.92913e-05
HTL_stack_sequence_BDTT:DPPD:TT	2.92631e-05
ETL_deposition_synthesis_atmosphere_ Air	2.92478e-05
HTL_stack_sequence_P3HT; Spiro-MeOTAD	2.92442e-05
HTL_stack_sequence_P8TTT	2.92291e-05
ETL_stack_sequence_ AZO-np	2.91697e-05
Perovskite_additives_compounds_Cl; SCN	2.91114e-05
Perovskite_deposition_after_treatment_of_formed_perovskite_Light soaking	2.91066e-05
ETL_stack_sequence_PN-P	2.90387e-05
Perovskite_additives_concentrations_0.7	2.89944e-05
HTL_deposition_procedure_Spray-pyrolys	2.89316e-05
HTL_additives_compounds_Li	2.89188e-05
Perovskite_pl_max_740.0	2.89072e-05
Perovskite_deposition_thermal_annealing_time_3.0; 5.0	2.89037e-05
HTL_stack_sequence_CuCrO2	2.88867e-05
ETL_deposition_procedure_ Electrospraying	2.88459e-05
Perovskite_deposition_procedure_Ultrasonic spray	2.88438e-05
Perovskite_composition_c_ions_coefficients_0.6; 2.4	2.88328e-05
Perovskite_deposition_quenching_media_additives_compounds_Undoped	2.87829e-05
ETL_stack_sequence_ZnO@rQD-np	2.8715e-05
Backcontact_deposition_procedure_Doctor blading	2.86972e-05
Perovskite_band_gap_1.22	2.86539e-05
ETL_additives_concentrations_0.01	2.86416e-05
Perovskite_deposition_thermal_annealing_temperature_140	2.86234e-05
HTL_stack_sequence_MeO-2PACz	2.85192e-05
Encapsulation_edge_sealing_materials_Ossila Epoxy E131	2.84299e-05
Backcontact_stack_sequence_ PEDOT:PSS	2.84196e-05
Substrate_stack_sequence_ Cu-nw	2.84177e-05
Perovskite_additives_concentrations_3	2.83957e-05
ETL_deposition_thermal_annealing_atmosphere_N2	2.8337e-05
Perovskite_additives_compounds_PVDF	2.83027e-05
Perovskite_deposition_thermal_annealing_time_5.0 >> 60.0	2.82941e-05
Substrate_stack_sequence_Willow glass	2.82204e-05
ETL_additives_compounds_ LiFTSI	2.82113e-05
Perovskite_composition_none_stoichiometry_components_in_excess_MABr	2.81982e-05
Perovskite_deposition_synthesis_atmosphere_N2 >> Methylamin	2.81896e-05
HTL_stack_sequence_TaTM	2.81458e-05
Perovskite_additives_concentrations_1 wt%	2.81272e-05
Perovskite_additives_compounds_Levulinic acid	2.81256e-05
Perovskite_additives_compounds_n-butyl amine; Cl	2.80791e-05
Perovskite_pl_max_798.0	2.80429e-05
HTL_additives_compounds_CI	2.80148e-05
Perovskite_additives_concentrations_0.5 mg/perovskite_mmol	2.79925e-05
Perovskite_additives_compounds_Pb(OAc)2	2.79426e-05
Perovskite_additives_compounds_Starch	2.79414e-05
Perovskite_deposition_solvents_Methanol; THF	2.78853e-05
Perovskite_band_gap_1.91	2.78734e-05
HTL_stack_sequence_M101	2.78691e-05
Perovskite_deposition_reaction_solutions_concentrations_0.5 M >> 30 mg/ml	2.78682e-05
HTL_stack_sequence_SGT-421	2.78103e-05
HTL_stack_sequence_BTF3	2.77893e-05
Perovskite_additives_compounds_DMI	2.77345e-05
Perovskite_deposition_solvents_Dimethylacetamide	2.76331e-05
Perovskite_additives_concentrations_0.0025	2.76278e-05
HTL_stack_sequence_DERDTS-TBDT	2.76274e-05
HTL_stack_sequence_CrO3	2.7572e-05
Perovskite_band_gap_1.627	2.75074e-05
Perovskite_additives_concentrations_0.01 wt%	2.75063e-05
range_ionic_radius	2.74771e-05
ETL_stack_sequence_ICBA	2.74299e-05
Backcontact_deposition_procedure_Dropcasting	2.74197e-05
Perovskite_deposition_solvents_mixing_ratios_1 >> 6; 4	2.74123e-05
Perovskite_deposition_procedure_Dropcasting >> Pneumatic pressure	2.73819e-05
HTL_deposition_procedure_RF magnetron sputtering	2.73789e-05
Perovskite_deposition_thermal_annealing_temperature_90.0 >> 100.0	2.7304e-05
Perovskite_deposition_thermal_annealing_temperature_25.0 >> 100.0	2.72978e-05
Perovskite_deposition_solvents_DMF; TBP >> IPA	2.72865e-05
Perovskite_additives_compounds_SnF2; TMA	2.72691e-05
HTL_additives_compounds_DMSO	2.72202e-05
HTL_stack_sequence_M108	2.71878e-05
min_1st_ionization_potential_(kJ/mol)	2.7163e-05
Perovskite_deposition_thermal_annealing_temperature_90; 100	2.71603e-05
Perovskite_deposition_thermal_annealing_temperature_70.0 >> 75.0	2.71493e-05
Perovskite_composition_c_ions_coefficients_0.37; 2.63	2.71298e-05
HTL_additives_compounds_Ethylene glycol	2.71167e-05
Perovskite_deposition_thermal_annealing_time_5.0; 5.0 >> 5.0	2.71104e-05
Perovskite_additives_compounds_AVAI	2.7094e-05
Perovskite_deposition_thermal_annealing_temperature_Unknown >> 130.0	2.70878e-05
Perovskite_deposition_after_treatment_of_formed_perovskite_met_11s	2.70726e-05
Perovskite_deposition_thermal_annealing_time_10.0; 40.0	2.70643e-05
Perovskite_additives_concentrations_0.016	2.70417e-05
HTL_stack_sequence_BV-FNPD	2.70178e-05
range_Zunger_radii_sum	2.69317e-05
Perovskite_deposition_thermal_annealing_time_0.25; 5.0	2.69153e-05
Perovskite_deposition_thermal_annealing_temperature_175.0	2.6865e-05
HTL_stack_sequence_XY1	2.6814e-05
ETL_additives_concentrations_6 wt%	2.67499e-05
Perovskite_band_gap_2.31	2.67371e-05
ETL_deposition_solvents_ a-Terpineol >> Ethanol	2.66856e-05
max_polarizability(A^3)	2.66063e-05
HTL_stack_sequence_PIF8-TAA	2.65573e-05
HTL_stack_sequence_Carbon; NiS	2.6554e-05
Perovskite_deposition_thermal_annealing_temperature_125.0; 100.0	2.65502e-05
min_Allred-Rockow_electronegativity	2.64801e-05
Perovskite_deposition_after_treatment_of_formed_perovskite_Laser annealing	2.64728e-05
Substrate_stack_sequence_ Au-np; Graphene; TFSA	2.647e-05
ETL_stack_sequence_ MgZnO	2.64272e-05
HTL_stack_sequence_P3CT-N	2.63171e-05
HTL_deposition_aggregation_state_of_reactants_Gas	2.63103e-05
ETL_additives_compounds_ Li-FTSI	2.63098e-05
ETL_deposition_procedure_Hydrothermal	2.63071e-05
Encapsulation_stack_sequence_PMMA	2.62333e-05
Perovskite_deposition_thermal_annealing_temperature_70.0 >> 85.0	2.62316e-05
Perovskite_additives_compounds_5F-PCDM-60	2.62207e-05
Perovskite_deposition_synthesis_atmosphere_relative_humidity_25 >> 25	2.61903e-05
Cell_area_total_0.12	2.61865e-05
Perovskite_additives_concentrations_100 mol%	2.61694e-05
HTL_stack_sequence_CoPcNO2-OPh	2.61477e-05
HTL_stack_sequence_X23	2.61418e-05
Cell_number_of_cells_per_substrate_20	2.6132e-05
HTL_stack_sequence_Cu2ZnSn4-np	2.61187e-05
HTL_stack_sequence_Porphyrin-H1	2.60896e-05
Perovskite_pl_max_783.0	2.60815e-05
ETL_stack_sequence_ Au@TiO2-np; TiO2-mp	2.60717e-05
Perovskite_deposition_thermal_annealing_temperature_100; 120	2.60174e-05
ETL_additives_compounds_Li-TFSI	2.59985e-05
HTL_stack_sequence_PDMS	2.59354e-05
Perovskite_additives_compounds_PbSCN2	2.59313e-05
Perovskite_deposition_thermal_annealing_temperature_70.0 >> 130.0	2.5917e-05
Perovskite_composition_none_stoichiometry_components_in_excess_CsI	2.58289e-05
Perovskite_deposition_quenching_media_liquid N2; N2	2.58148e-05
HTL_stack_sequence_Carbozole @ S12	2.58105e-05
Perovskite_deposition_thermal_annealing_temperature_33.0	2.58023e-05
HTL_stack_sequence_Co-Porphyrin	2.57954e-05
Perovskite_deposition_thermal_annealing_temperature_70 >> Unknown	2.5789e-05
Backcontact_stack_sequence_ Cu	2.57888e-05
Perovskite_additives_compounds_MACl	2.57746e-05
Perovskite_deposition_thermal_annealing_temperature_75 >> 75; 70	2.57367e-05
Perovskite_deposition_thermal_annealing_temperature_90.0 >> 70.0	2.57281e-05
HTL_additives_compounds_Li-TFSI; PMo11V; TBP	2.57165e-05
HTL_stack_sequence_COTT-1	2.56872e-05
Perovskite_additives_compounds_Cl; NH4I	2.56361e-05
Perovskite_deposition_quenching_media_Petroleum ether	2.56289e-05
Perovskite_deposition_solvent_annealing_solvent_atmosphere_Chlorobenzene	2.56044e-05
Perovskite_deposition_solvents_DMF; DMSO >> IPA >> IPA	2.55525e-05
HTL_stack_sequence_SY1	2.5551e-05
ETL_deposition_procedure_ Sputtering	2.5544e-05
Perovskite_additives_concentrations_20; 10	2.54956e-05
Perovskite_additives_concentrations_0.15; 0.15	2.54902e-05
ETL_deposition_synthesis_atmosphere_N2	2.54841e-05
Perovskite_deposition_thermal_annealing_temperature_50	2.54822e-05
HTL_stack_sequence_ PEI-HI	2.54137e-05
Perovskite_deposition_thermal_annealing_temperature_50; 60; 70; 80; 90; 100	2.5392e-05
Perovskite_deposition_solvents_H2O >> Hexane; IPA	2.53721e-05
Backcontact_deposition_procedure_Candle burning >> Lamination	2.53692e-05
Perovskite_additives_compounds_PCBM-70	2.53661e-05
HTL_additives_concentrations_520 mg/ml; 334 mol%	2.53647e-05
Perovskite_additives_compounds_Carbon-QDs	2.53433e-05
Perovskite_band_gap_1.72	2.53318e-05
Perovskite_deposition_thermal_annealing_temperature_250	2.53054e-05
HTL_stack_sequence_SiTP-OMeTPA	2.52953e-05
Perovskite_deposition_solvents_2-methoxyethanol	2.52944e-05
Perovskite_additives_compounds_Ag@SiO2-nw	2.51939e-05
Perovskite_deposition_after_treatment_of_formed_perovskite_UV radiation	2.51802e-05
Perovskite_additives_compounds_Cl; PNVF-NVEE Microgels	2.51557e-05
Perovskite_deposition_thermal_annealing_temperature_90.0; 100.0	2.50955e-05
Perovskite_additives_compounds_Cl; ICBA	2.50733e-05
Substrate_stack_sequence_ PEDOT:PSS	2.50379e-05
HTL_stack_sequence_Zn-Chl	2.50322e-05
Perovskite_deposition_synthesis_atmosphere_Air >> Air; MAI	2.49322e-05
Perovskite_deposition_quenching_media_mixing_ratios_1; 0.7	2.49166e-05
HTL_stack_sequence_ CuSCN	2.48999e-05
Perovskite_deposition_solvents_mixing_ratios_17; 3 >> 1	2.48848e-05
Perovskite_deposition_thermal_annealing_time_5.0 >> 45.0	2.48599e-05
Perovskite_deposition_thermal_annealing_time_30.0; Unknown	2.48575e-05
Perovskite_deposition_synthesis_atmosphere_relative_humidity_65 >> 65	2.48533e-05
Perovskite_additives_concentrations_0.042	2.4841e-05
ETL_additives_compounds_ F127	2.47888e-05
HTL_stack_sequence_Asy-PBTBDT	2.47874e-05
HTL_stack_sequence_S5	2.47833e-05
Perovskite_deposition_procedure_Spin-coating >> Evaporation	2.47815e-05
ETL_deposition_procedure_ Electrodeposition	2.47684e-05
Perovskite_additives_compounds_Polyvinylbutyral	2.47568e-05
HTL_stack_sequence_DBTMT	2.47396e-05
Substrate_stack_sequence_ Cu	2.47165e-05
Perovskite_deposition_solvent_annealing_temperature_Unknown	2.46839e-05
ETL_deposition_solvents_Dichlorobenzene	2.46838e-05
Perovskite_additives_concentrations_0.9	2.46711e-05
Perovskite_deposition_thermal_annealing_time_60.0; 60.0	2.46526e-05
HTL_stack_sequence_HTM-M1	2.46388e-05
Perovskite_composition_c_ions_coefficients_0.30; 2.70	2.4604e-05
Perovskite_additives_concentrations_6.0	2.45743e-05
ETL_additives_compounds_ H	2.45605e-05
Perovskite_composition_a_ions_coefficients_0.3; 0.7	2.44966e-05
Backcontact_deposition_substrate_temperature_25	2.44956e-05
Perovskite_deposition_procedure_Slot-die coating >> CBD	2.44921e-05
Perovskite_deposition_thermal_annealing_temperature_80; 100	2.44912e-05
Perovskite_deposition_thermal_annealing_temperature_70.0 >> 50.0	2.44893e-05
Add_lay_front_stack_sequence_Unknown	2.44886e-05
HTL_deposition_procedure_Air brush spray	2.44497e-05
HTL_deposition_solvents_Water	2.44341e-05
Perovskite_deposition_thermal_annealing_time_Unknown >> 2.0	2.44295e-05
Perovskite_deposition_thermal_annealing_temperature_70.0 >> 95.0	2.43966e-05
ETL_stack_sequence_ TIPD	2.43444e-05
Perovskite_deposition_quenching_media_additives_compounds_PCBM-60	2.43305e-05
Perovskite_additives_compounds_Cl; MAAc	2.43115e-05
Perovskite_single_crystal_False	2.43065e-05
Perovskite_deposition_thermal_annealing_time_Unknown >> 0.333333333	2.42995e-05
HTL_deposition_solvents_none	2.42419e-05
Module_area_total_0.12	2.4213e-05
Backcontact_deposition_synthesis_atmosphere_pressure_partial_0.006 Torr	2.41962e-05
Perovskite_additives_compounds_5-AVAI	2.41852e-05
Perovskite_deposition_thermal_annealing_time_20.0 >> 60.0	2.41788e-05
Perovskite_additives_concentrations_0.5 M	2.41057e-05
ETL_deposition_procedure_Spray-coating	2.40794e-05
Perovskite_additives_compounds_Cl; TBPI	2.40004e-05
Perovskite_deposition_solvents_Terpineol	2.39992e-05
Perovskite_deposition_synthesis_atmosphere_Unknown >> Unknown	2.39917e-05
Perovskite_deposition_procedure_Electrospinning	2.39806e-05
HTL_stack_sequence_Polyacrylonitrile	2.39359e-05
ETL_stack_sequence_ ZnO-nw	2.39156e-05
Perovskite_deposition_thermal_annealing_temperature_100; 150	2.39136e-05
Perovskite_additives_compounds_Formamide	2.38961e-05
Add_lay_front_stack_sequence_Mica	2.38825e-05
Perovskite_composition_a_ions_(PEA); MA	2.3874e-05
Backcontact_stack_sequence_Graphene	2.38403e-05
HTL_stack_sequence_2窶紳minoterephthalic acid	2.38175e-05
HTL_stack_sequence_CuCo2O4	2.37829e-05
HTL_deposition_procedure_Evaporation >> Oxidation	2.37751e-05
ETL_deposition_reaction_solutions_compounds_Zinc Acetate dehydrate; ethanolamine	2.3746e-05
ETL_stack_sequence_ ZIF-8	2.3742e-05
Perovskite_composition_none_stoichiometry_components_in_excess_SnF2; Sn	2.37356e-05
Perovskite_deposition_thermal_annealing_time_10.0 >> 8.0	2.37331e-05
ETL_stack_sequence_Polystyrene	2.36967e-05
Perovskite_deposition_reaction_solutions_age_Unknown	2.36802e-05
Perovskite_deposition_thermal_annealing_time_3.0; 12.0	2.36571e-05
HTL_stack_sequence_Oleylamine	2.36309e-05
Perovskite_deposition_solvents_mixing_ratios_1; 5	2.36062e-05
Perovskite_deposition_reaction_solutions_compounds_supplier_Unknown	2.35886e-05
HTL_deposition_reaction_solutions_temperature_Unknown	2.35589e-05
Perovskite_pl_max_685.0	2.35514e-05
ETL_stack_sequence_LiF	2.3543e-05
ETL_deposition_thermal_annealing_time_Unknown	2.35305e-05
Substrate_stack_sequence_Mica	2.35225e-05
ETL_stack_sequence_ Ag	2.35042e-05
Perovskite_pl_max_722.0	2.3502e-05
Perovskite_additives_concentrations_0.1 wt%	2.34842e-05
Perovskite_deposition_thermal_annealing_temperature_100; 160	2.34588e-05
Perovskite_additives_compounds_Cl; Fe(acac)3	2.34545e-05
Perovskite_deposition_thermal_annealing_time_1.0; 25.0	2.34396e-05
Perovskite_deposition_thermal_annealing_time_Unknown >> 75.0	2.34303e-05
mode_1st_ionization_potential_(kJ/mol)	2.33413e-05
ETL_deposition_reaction_solutions_concentrations_ 0.5 mg/ml	2.33111e-05
ETL_additives_compounds_Carbon-QDs	2.32403e-05
HTL_stack_sequence_P5	2.32204e-05
[truncated: 13,307 more rows]

## Sheet: Table S8
Table S8. Sorted feature importance after aggregation for the 248 columns
Column name	Feature importane
Perovskite_composition_long_form	0.0880226
Perovskite_deposition_quenching_induced_crystallisation	0.0840296
HTL_stack_sequence	0.070474
Perovskite_deposition_solvents	0.064044
ETL_stack_sequence	0.0563101
Perovskite_composition_leadfree	0.0558878
Perovskite_deposition_thermal_annealing_time	0.0444541
Perovskite_deposition_thermal_annealing_temperature	0.0373776
Perovskite_composition_a_ions	0.0365768
Perovskite_deposition_quenching_media	0.0340628
Cell_area_measured	0.0330239
ETL_deposition_procedure	0.0313166
ETL_thickness	0.0283473
Perovskite_composition_a_ions_coefficients	0.0264199
Backcontact_thickness_list	0.0261992
Perovskite_deposition_solvents_mixing_ratios	0.0230076
Perovskite_thickness	0.0227761
Perovskite_deposition_synthesis_atmosphere	0.019582
HTL_additives_compounds	0.0181897
Backcontact_stack_sequence	0.0161426
Perovskite_additives_compounds	0.0157161
Perovskite_band_gap	0.0138988
HTL_thickness_list	0.0132861
Substrate_stack_sequence	0.0115332
Perovskite_additives_concentrations	0.011356
Perovskite_pl_max	0.0113553
HTL_deposition_procedure	0.0111533
Perovskite_deposition_procedure	0.0108644
ETL_additives_compounds	0.00996974
Backcontact_deposition_procedure	0.00626047
Cell_semitransparent	0.00507901
Perovskite_composition_none_stoichiometry_components_in_excess	0.00441969
Perovskite_composition_c_ions	0.00410938
Cell_architecture	0.00356194
Encapsulation	0.00352517
Perovskite_composition_b_ions	0.00340735
Perovskite_composition_c_ions_coefficients	0.00290499
Perovskite_deposition_aggregation_state_of_reactants	0.00284339
Perovskite_deposition_solvent_annealing	0.00227186
Perovskite_deposition_after_treatment_of_formed_perovskite	0.00218025
Perovskite_band_gap_estimation_basis	0.00200775
Perovskite_deposition_synthesis_atmosphere_relative_humidity	0.0018754
Perovskite_composition_b_ions_coefficients	0.00179154
Perovskite_deposition_number_of_deposition_steps	0.00153063
Cell_flexible	0.00143542
Module	0.00138789
Encapsulation_stack_sequence	0.00129322
ETL_deposition_thermal_annealing_temperature	0.00129171
HTL_additives_concentrations	0.00126264
Perovskite_composition_short_form	0.0010185
ETL_deposition_solvents	0.000882498
Perovskite_deposition_solvent_annealing_solvent_atmosphere	0.000841956
HTL_deposition_aggregation_state_of_reactants	0.000805699
Encapsulation_edge_sealing_materials	0.000603535
HTL_deposition_reaction_solutions_compounds	0.000572839
ETL_deposition_synthesis_atmosphere	0.000568937
ETL_deposition_aggregation_state_of_reactants	0.000548028
ETL_additives_concentrations	0.000538568
ETL_deposition_thermal_annealing_time	0.000458779
Perovskite_composition_perovskite_ABC3_structure	0.000452731
Perovskite_deposition_thermal_annealing_atmosphere	0.000451157
HTL_deposition_reaction_solutions_concentrations	0.000441752
Module_number_of_cells_in_module	0.000414179
Perovskite_deposition_quenching_media_additives_compounds	0.000399185
Perovskite_deposition_reaction_solutions_compounds	0.000398209
Encapsulation_atmosphere_for_encapsulation	0.000396271
HTL_deposition_solvents	0.000365975
ETL_deposition_reaction_solutions_compounds	0.000362385
ETL_surface_treatment_before_next_deposition_step	0.000348335
Add_lay_front	0.000318806
HTL_deposition_thermal_annealing_temperature	0.000310844
Perovskite_deposition_reaction_solutions_concentrations	0.000295971
Perovskite_deposition_quenching_media_mixing_ratios	0.000295081
HTL_deposition_synthesis_atmosphere	0.000270365
Perovskite_dimension_3D	0.000268124
Perovskite_deposition_after_treatment_of_formed_perovskite_met	0.00025747
Module_JV_data_recalculated_per_cell	0.000255137
HTL_deposition_thermal_annealing_atmosphere	0.000241163
Backcontact_deposition_synthesis_atmosphere	0.000240341
Substrate_deposition_procedure	0.000236981
Perovskite_dimension_list_of_layers	0.00023081
Module_area_total	0.000215511
ETL_deposition_thermal_annealing_atmosphere	0.000212867
Perovskite_storage_relative_humidity	0.000208384
Perovskite_deposition_quenching_media_additives_concentrations	0.000203027
Backcontact_deposition_solvents	0.000202414
Perovskite_deposition_solvent_annealing_time	0.000196956
Perovskite_storage_time_until_next_deposition_step	0.000183237
ETL_deposition_reaction_solutions_concentrations	0.00017835
Cell_area_total	0.000178027
Backcontact_deposition_reaction_solutions_compounds	0.000172247
Backcontact_deposition_aggregation_state_of_reactants	0.000168946
Perovskite_storage_atmosphere	0.000159424
Perovskite_dimension_2D	0.000144212
ETL_deposition_substrate_temperature	0.000141843
HTL_deposition_thermal_annealing_time	0.00013959
HTL_surface_treatment_before_next_deposition_step	0.000135431
ETL_deposition_solvents_supplier	0.000123848
Perovskite_deposition_substrate_temperature	0.000110476
Perovskite_dimension_0D	0.000105817
ETL_deposition_solvents_mixing_ratios	0.000104079
ETL_deposition_reaction_solutions_temperature	0.000101655
Module_area_effective	0.000101455
Perovskite_composition_assumption	0.000101154
ETL_deposition_reaction_solutions_compounds_supplier	9.54747e-05
HTL_deposition_substrate_temperature	8.92143e-05
Cell_number_of_cells_per_substrate	8.85331e-05
Perovskite_deposition_reaction_solutions_temperature	8.77366e-05
ETL_deposition_reaction_solutions_age	8.59975e-05
Add_lay_front_stack_sequence	8.3323e-05
Perovskite_deposition_quenching_media_volume	7.83044e-05
Cell_semitransparent_wavelength_range	7.808e-05
Backcontact_deposition_substrate_temperature	7.73216e-05
Backcontact_deposition_thermal_annealing_temperature	7.25098e-05
Substrate_cleaning_procedure	7.03487e-05
Perovskite_deposition_solvents_supplier	6.87874e-05
Perovskite_dimension_3D_with_2D_capping_layer	6.59373e-05
Add_lay_front_function	6.09852e-05
Perovskite_deposition_solvent_annealing_timing	5.9489e-05
HTL_deposition_reaction_solutions_compounds_supplier	5.87458e-05
HTL_deposition_solvents_mixing_ratios	5.74301e-05
Substrate_supplier	5.5404e-05
Substrate_etching_procedure	5.52413e-05
Perovskite_deposition_solvent_annealing_temperature	5.49296e-05
Backcontact_additives_compounds	5.15157e-05
Substrate_area	4.93657e-05
Backcontact_deposition_synthesis_atmosphere_pressure_total	4.07681e-05
Perovskite_single_crystal	4.05396e-05
HTL_deposition_reaction_solutions_temperature	4.04884e-05
Substrate_thickness	3.9598e-05
Perovskite_deposition_reaction_solutions_compounds_supplier	3.70182e-05
ETL_deposition_synthesis_atmosphere_pressure_total	3.6868e-05
Perovskite_deposition_reaction_solutions_age	3.56374e-05
HTL_deposition_reaction_solutions_volumes	3.32211e-05
Backcontact_deposition_synthesis_atmosphere_pressure_partial	3.24423e-05
Perovskite_deposition_reaction_solutions_volumes	3.10634e-05
Backcontact_deposition_reaction_solutions_temperature	3.0802e-05
ETL_deposition_reaction_solutions_volumes	3.03155e-05
ETL_deposition_synthesis_atmosphere_pressure_partial	2.92741e-05
HTL_deposition_solvents_supplier	2.8303e-05
Substrate_brand_name	2.65494e-05
Perovskite_deposition_synthesis_atmosphere_pressure_partial	2.47816e-05
Perovskite_deposition_synthesis_atmosphere_pressure_total	2.36776e-05
Perovskite_deposition_reaction_solutions_compounds_purity	2.21383e-05
Backcontact_deposition_thermal_annealing_time	2.15971e-05
HTL_deposition_synthesis_atmosphere_pressure_partial	2.05446e-05
Backcontact_deposition_solvents_mixing_ratios	1.92409e-05
HTL_deposition_synthesis_atmosphere_pressure_total	1.90173e-05
Perovskite_composition_inorganic	1.81932e-05
HTL_storage_atmosphere	1.76167e-05
Cell_semitransparent_AVT	1.73258e-05
ETL_deposition_synthesis_atmosphere_relative_humidity	1.69217e-05
ETL_deposition_reaction_solutions_compounds_purity	1.67925e-05
Backcontact_deposition_thermal_annealing_atmosphere	1.66932e-05
Perovskite_surface_treatment_before_next_deposition_step	1.64035e-05
Perovskite_deposition_thermal_annealing_pressure	1.62603e-05
Backcontact_surface_treatment_before_next_deposition_step	1.56833e-05
Perovskite_deposition_solvents_purity	1.39522e-05
HTL_deposition_synthesis_atmosphere_relative_humidity	1.35517e-05
Add_lay_back	1.30797e-05
Perovskite_dimension_2D3D_mixture	1.28433e-05
ETL_storage_atmosphere	1.24294e-05
Backcontact_deposition_reaction_solutions_compounds_supplier	1.02541e-05
HTL_deposition_reaction_solutions_compounds_purity	9.99302e-06
Perovskite_deposition_thermal_annealing_relative_humidity	7.31239e-06
ETL_deposition_solvents_purity	7.06049e-06
Perovskite_composition_perovskite_inspired_structure	6.7165e-06
Add_lay_back_function	4.40162e-06
Perovskite_band_gap_graded	4.38303e-06
Backcontact_storage_atmosphere	3.4393e-06
HTL_deposition_reaction_solutions_age	2.79982e-06
HTL_storage_time_until_next_deposition_step	2.5345e-06
ETL_storage_time_until_next_deposition_step	2.18499e-06
HTL_deposition_solvents_purity	1.9657e-06
Add_lay_back_stack_sequence	1.92292e-06
Backcontact_storage_time_until_next_deposition_step	1.69402e-06
Encapsulation_water_vapour_transmission_rate	1.60066e-06
Add_lay_front_deposition_procedure	1.50074e-06
Backcontact_deposition_synthesis_atmosphere_relative_humidity	1.25008e-06
Add_lay_front_thickness_list	1.23043e-06
ETL_storage_relative_humidity	1.00548e-06
Backcontact_deposition_reaction_solutions_compounds_purity	9.72384e-07
HTL_storage_relative_humidity	8.21537e-07
Backcontact_storage_relative_humidity	8.18746e-07
Add_lay_back_thickness_list	4.9096e-07
Add_lay_back_deposition_procedure	4.65168e-07
Backcontact_deposition_reaction_solutions_volumes	1.94915e-07
Backcontact_deposition_reaction_solutions_concentrations	1.02855e-07
Backcontact_deposition_solvents_supplier	8.90913e-08
Add_lay_back_deposition_reaction_solutions_compounds_purity	0
Add_lay_back_deposition_synthesis_atmosphere	0
Add_lay_back_deposition_synthesis_atmosphere_pressure_total	0
Add_lay_back_deposition_synthesis_atmosphere_pressure_partial	0
Add_lay_back_deposition_synthesis_atmosphere_relative_humidity	0
Add_lay_back_deposition_solvents	0
Add_lay_back_deposition_solvents_mixing_ratios	0
Add_lay_back_deposition_solvents_supplier	0
Add_lay_back_deposition_solvents_purity	0
Add_lay_back_deposition_reaction_solutions_compounds	0
Add_lay_back_deposition_reaction_solutions_compounds_supplier	0
Add_lay_back_deposition_thermal_annealing_time	0
Add_lay_back_deposition_reaction_solutions_concentrations	0
Add_lay_back_deposition_reaction_solutions_volumes	0
Add_lay_back_deposition_reaction_solutions_age	0
Add_lay_back_deposition_reaction_solutions_temperature	0
Add_lay_back_deposition_substrate_temperature	0
Add_lay_back_deposition_thermal_annealing_temperature	0
Add_lay_back_deposition_thermal_annealing_atmosphere	0
Add_lay_back_storage_time_until_next_deposition_step	0
Add_lay_back_storage_atmosphere	0
Add_lay_back_storage_relative_humidity	0
Add_lay_back_surface_treatment_before_next_deposition_step	0
Cell_flexible_min_bending_radius	0
Substrate_surface_roughness_rms	0
Encapsulation_oxygen_transmission_rate	0
Add_lay_back_deposition_aggregation_state_of_reactants	0
Backcontact_deposition_reaction_solutions_age	0
Add_lay_back_additives_concentrations	0
Add_lay_front_deposition_reaction_solutions_compounds_supplier	0
Backcontact_deposition_solvents_purity	0
Add_lay_front_additives_compounds	0
Add_lay_front_additives_concentrations	0
Add_lay_front_deposition_aggregation_state_of_reactants	0
Add_lay_front_deposition_synthesis_atmosphere	0
Add_lay_front_deposition_synthesis_atmosphere_pressure_total	0
Add_lay_front_deposition_synthesis_atmosphere_pressure_partial	0
Add_lay_front_deposition_synthesis_atmosphere_relative_humidity	0
Add_lay_front_deposition_solvents	0
Add_lay_front_deposition_solvents_mixing_ratios	0
Add_lay_front_deposition_solvents_supplier	0
Add_lay_front_deposition_solvents_purity	0
Add_lay_front_deposition_reaction_solutions_compounds	0
Add_lay_front_deposition_reaction_solutions_compounds_purity	0
Add_lay_back_additives_compounds	0
Add_lay_front_deposition_reaction_solutions_concentrations	0
Add_lay_front_deposition_reaction_solutions_volumes	0
Add_lay_front_deposition_reaction_solutions_age	0
Add_lay_front_deposition_reaction_solutions_temperature	0
Add_lay_front_deposition_substrate_temperature	0
Add_lay_front_deposition_thermal_annealing_temperature	0
Add_lay_front_deposition_thermal_annealing_time	0
Add_lay_front_deposition_thermal_annealing_atmosphere	0
Add_lay_front_storage_time_until_next_deposition_step	0
Add_lay_front_storage_atmosphere	0
Add_lay_front_storage_relative_humidity	0
Add_lay_front_surface_treatment_before_next_deposition_step	0
Cell_semitransparent_raw_data	0
Backcontact_additives_concentrations	0
Cell_area_total	0
